# Supplementary material for: Comparison and analysis of lncRNA-mediated ceRNA regulation in different molecular subtypes of glioblastoma
Source: Royal Society of Chemistry journal article supplement (doi:10.1039/c9mo00126c), 2019-10-02
Supplement: c9mo00126c1.zip [file c9mo00126c1.zip]

## Sheet: Sheet1
lncRNA	miRNA	mRNA	p	r	subtype
ENSG00000267106	hsa-miR-335-5p	ENSG00000184182	1.64924e-14	0.847279	CL
ENSG00000234741	hsa-miR-21-5p	ENSG00000171863	2.58545e-14	0.844083	CL
ENSG00000175061	hsa-miR-223-3p	ENSG00000143575	2.6151e-13	0.826433	CL
ENSG00000222041	hsa-miR-1-3p	ENSG00000158710	3.95023e-13	0.823063	CL
ENSG00000267106	hsa-miR-7-5p	ENSG00000189043	3.30143e-12	0.804521	CL
ENSG00000222041	hsa-miR-1-3p	ENSG00000182718	4.04868e-12	0.802628	CL
ENSG00000222041	hsa-miR-206	ENSG00000182718	4.04868e-12	0.802628	CL
ENSG00000215424	hsa-miR-155-5p	ENSG00000176953	6.53948e-12	0.798098	CL
ENSG00000267106	hsa-miR-93-5p	ENSG00000114383	1.01149e-11	0.793875	CL
ENSG00000153187	hsa-miR-135a-5p	ENSG00000146587	1.64055e-11	0.789076	CL
ENSG00000153187	hsa-miR-149-5p	ENSG00000181472	2.22481e-11	0.785988	CL
ENSG00000235531	hsa-miR-378a-3p	ENSG00000178860	2.95792e-11	0.783054	CL
ENSG00000237125	hsa-miR-25-3p	ENSG00000164107	3.24525e-11	0.782089	CL
ENSG00000223773	hsa-miR-30a-5p	ENSG00000002586	4.44333e-11	0.778783	CL
ENSG00000267106	hsa-miR-17-5p	ENSG00000172465	4.8387e-11	0.777876	CL
ENSG00000267106	hsa-miR-106b-5p	ENSG00000172465	4.8387e-11	0.777876	CL
ENSG00000267106	hsa-miR-20a-5p	ENSG00000172465	4.8387e-11	0.777876	CL
ENSG00000242125	hsa-miR-1207-5p	ENSG00000165283	7.3293e-11	0.773398	CL
ENSG00000214106	hsa-miR-145-5p	ENSG00000133789	9.0459e-11	0.771089	CL
ENSG00000267106	hsa-miR-20a-5p	ENSG00000074319	1.01542e-10	0.769809	CL
ENSG00000258867	hsa-miR-424-5p	ENSG00000066336	1.43412e-10	0.765937	CL
ENSG00000247095	hsa-miR-106a-5p	ENSG00000112715	1.46869e-10	0.765667	CL
ENSG00000258867	hsa-miR-146a-5p	ENSG00000137462	1.55279e-10	0.765035	CL
ENSG00000245573	hsa-miR-145-5p	ENSG00000175348	1.82078e-10	0.763216	CL
ENSG00000245526	hsa-miR-21-5p	ENSG00000181449	3.47528e-10	0.755662	CL
ENSG00000245526	hsa-miR-371a-5p	ENSG00000181449	3.47528e-10	0.755662	CL
ENSG00000245526	hsa-miR-34c-5p	ENSG00000181449	3.47528e-10	0.755662	CL
ENSG00000245526	hsa-miR-429	ENSG00000181449	3.47528e-10	0.755662	CL
ENSG00000245526	hsa-miR-140-5p	ENSG00000181449	3.47528e-10	0.755662	CL
ENSG00000245526	hsa-miR-340-5p	ENSG00000181449	3.47528e-10	0.755662	CL
ENSG00000248698	hsa-miR-146a-5p	ENSG00000181449	4.10294e-10	0.753676	CL
ENSG00000248698	hsa-miR-140-5p	ENSG00000181449	4.10294e-10	0.753676	CL
ENSG00000248698	hsa-miR-128-3p	ENSG00000181449	4.10294e-10	0.753676	CL
ENSG00000267106	hsa-miR-203a-3p	ENSG00000175334	4.3087e-10	0.753088	CL
ENSG00000260339	hsa-miR-21-5p	ENSG00000181449	6.36007e-10	0.748344	CL
ENSG00000260339	hsa-miR-145-5p	ENSG00000181449	6.36007e-10	0.748344	CL
ENSG00000260339	hsa-miR-429	ENSG00000181449	6.36007e-10	0.748344	CL
ENSG00000222041	hsa-miR-24-3p	ENSG00000134333	6.93181e-10	0.747281	CL
ENSG00000153187	hsa-miR-324-3p	ENSG00000005339	7.72967e-10	0.745928	CL
ENSG00000153187	hsa-miR-488-3p	ENSG00000107581	1.0282e-09	0.742345	CL
ENSG00000255571	hsa-miR-182-5p	ENSG00000128594	1.04289e-09	0.742165	CL
ENSG00000206337	hsa-miR-202-3p	ENSG00000102524	1.07677e-09	0.74176	CL
ENSG00000255571	hsa-miR-187-3p	ENSG00000072832	1.32509e-09	0.739109	CL
ENSG00000206337	hsa-miR-383-5p	ENSG00000161955	1.87561e-09	0.734599	CL
ENSG00000269293	hsa-miR-129-5p	ENSG00000184182	2.01145e-09	0.733681	CL
ENSG00000267106	hsa-miR-7-5p	ENSG00000077721	2.453e-09	0.731052	CL
ENSG00000235597	hsa-let-7i-5p	ENSG00000139352	2.54389e-09	0.730567	CL
ENSG00000153187	hsa-miR-25-3p	ENSG00000009413	2.69384e-09	0.729801	CL
ENSG00000177112	hsa-let-7b-5p	ENSG00000214575	2.71588e-09	0.729692	CL
ENSG00000218510	hsa-miR-377-3p	ENSG00000142168	2.99971e-09	0.728356	CL
ENSG00000258867	hsa-miR-433-3p	ENSG00000162645	3.00014e-09	0.728354	CL
ENSG00000220575	hsa-miR-148a-3p	ENSG00000169884	3.71421e-09	0.725458	CL
ENSG00000260339	hsa-miR-142-3p	ENSG00000115008	3.77802e-09	0.725226	CL
ENSG00000215424	hsa-miR-129-5p	ENSG00000114770	4.16027e-09	0.723905	CL
ENSG00000258867	hsa-miR-135b-5p	ENSG00000204103	5.14826e-09	0.720958	CL
ENSG00000230006	hsa-miR-107	ENSG00000168539	5.69103e-09	0.719559	CL
ENSG00000152931	hsa-miR-34c-5p	ENSG00000145335	5.71549e-09	0.719499	CL
ENSG00000248698	hsa-miR-30a-5p	ENSG00000002586	5.76499e-09	0.719378	CL
ENSG00000175061	hsa-miR-200a-3p	ENSG00000092208	6.44142e-09	0.717818	CL
ENSG00000186594	hsa-miR-23a-3p	ENSG00000169429	7.23267e-09	0.716178	CL
ENSG00000186594	hsa-miR-106a-5p	ENSG00000169429	7.23267e-09	0.716178	CL
ENSG00000220575	hsa-miR-302a-3p	ENSG00000006128	7.904e-09	0.714914	CL
ENSG00000220575	hsa-miR-320a	ENSG00000006128	7.904e-09	0.714914	CL
ENSG00000245060	hsa-miR-124-3p	ENSG00000177105	8.09301e-09	0.714576	CL
ENSG00000186594	hsa-miR-206	ENSG00000108691	8.4373e-09	0.71398	CL
ENSG00000186594	hsa-miR-495-3p	ENSG00000108691	8.4373e-09	0.71398	CL
ENSG00000186594	hsa-miR-1-3p	ENSG00000108691	8.4373e-09	0.71398	CL
ENSG00000206337	hsa-miR-211-5p	ENSG00000157601	8.61616e-09	0.713679	CL
ENSG00000175061	hsa-miR-22-3p	ENSG00000162704	9.31391e-09	0.712558	CL
ENSG00000267106	hsa-miR-106a-5p	ENSG00000085871	9.48775e-09	0.712291	CL
ENSG00000237372	hsa-miR-371a-5p	ENSG00000181449	9.76971e-09	0.711868	CL
ENSG00000240498	hsa-let-7g-5p	ENSG00000147889	1.19928e-08	0.708884	CL
ENSG00000232021	hsa-miR-149-5p	ENSG00000125384	1.21923e-08	0.708642	CL
ENSG00000235703	hsa-miR-181c-5p	ENSG00000173531	1.24255e-08	0.708364	CL
ENSG00000235703	hsa-miR-130b-3p	ENSG00000173531	1.24255e-08	0.708364	CL
ENSG00000218510	hsa-miR-17-5p	ENSG00000172465	1.24561e-08	0.708328	CL
ENSG00000218510	hsa-miR-221-3p	ENSG00000172465	1.24561e-08	0.708328	CL
ENSG00000218510	hsa-miR-22-3p	ENSG00000172465	1.24561e-08	0.708328	CL
ENSG00000227392	hsa-let-7f-5p	ENSG00000167755	1.57562e-08	0.704853	CL
ENSG00000206337	hsa-miR-146a-5p	ENSG00000271503	1.71415e-08	0.703595	CL
ENSG00000258867	hsa-miR-146a-5p	ENSG00000271503	1.74333e-08	0.703342	CL
ENSG00000260032	hsa-miR-21-5p	ENSG00000124151	1.78195e-08	0.703014	CL
ENSG00000260032	hsa-miR-18a-5p	ENSG00000124151	1.78195e-08	0.703014	CL
ENSG00000218510	hsa-miR-199a-5p	ENSG00000110801	1.8395e-08	0.702536	CL
ENSG00000214381	hsa-miR-125b-5p	ENSG00000111319	1.92859e-08	0.701824	CL
ENSG00000231889	hsa-miR-23b-3p	ENSG00000277443	1.99238e-08	0.701333	CL
ENSG00000175061	hsa-miR-218-5p	ENSG00000147155	2.49701e-08	0.697898	CL
ENSG00000177640	hsa-miR-29b-3p	ENSG00000171885	2.6336e-08	0.697081	CL
ENSG00000177112	hsa-miR-98-5p	ENSG00000114383	2.66661e-08	0.696889	CL
ENSG00000177112	hsa-miR-19a-3p	ENSG00000114383	2.66661e-08	0.696889	CL
ENSG00000267106	hsa-miR-93-5p	ENSG00000155366	2.67185e-08	0.696859	CL
ENSG00000267106	hsa-miR-138-5p	ENSG00000155366	2.67185e-08	0.696859	CL
ENSG00000267106	hsa-miR-106b-5p	ENSG00000155366	2.67185e-08	0.696859	CL
ENSG00000152931	hsa-miR-141-3p	ENSG00000138378	2.74531e-08	0.696441	CL
ENSG00000237149	hsa-miR-17-5p	ENSG00000239697	2.7774e-08	0.696262	CL
ENSG00000234420	hsa-miR-146a-5p	ENSG00000115904	2.87659e-08	0.695721	CL
ENSG00000255571	hsa-miR-182-5p	ENSG00000102678	2.95847e-08	0.695286	CL
ENSG00000255693	hsa-miR-320a	ENSG00000072315	2.9739e-08	0.695206	CL
ENSG00000184608	hsa-miR-146a-5p	ENSG00000163914	3.2914e-08	0.69363	CL
ENSG00000205704	hsa-miR-143-3p	ENSG00000189283	3.44113e-08	0.692935	CL
ENSG00000280780	hsa-miR-138-5p	ENSG00000163947	3.47758e-08	0.692771	CL
ENSG00000171101	hsa-miR-34a-5p	ENSG00000066336	3.8321e-08	0.691248	CL
ENSG00000222041	hsa-miR-193a-3p	ENSG00000122861	4.01228e-08	0.690524	CL
ENSG00000222041	hsa-miR-193b-3p	ENSG00000122861	4.01228e-08	0.690524	CL
ENSG00000234420	hsa-miR-129-5p	ENSG00000126070	4.33271e-08	0.689308	CL
ENSG00000175061	hsa-miR-192-5p	ENSG00000163041	4.33625e-08	0.689295	CL
ENSG00000206337	hsa-miR-15a-5p	ENSG00000169245	4.54247e-08	0.688558	CL
ENSG00000204650	hsa-miR-23a-3p	ENSG00000137343	4.6112e-08	0.688319	CL
ENSG00000152931	hsa-miR-34a-5p	ENSG00000067715	4.6439e-08	0.688206	CL
ENSG00000245060	hsa-miR-133a-3p	ENSG00000198805	4.73981e-08	0.68788	CL
ENSG00000267064	hsa-miR-210-3p	ENSG00000197548	5.29761e-08	0.6861	CL
ENSG00000237125	hsa-miR-203a-3p	ENSG00000128652	5.60894e-08	0.685181	CL
ENSG00000215417	hsa-miR-129-5p	ENSG00000126070	6.00246e-08	0.684086	CL
ENSG00000118412	hsa-miR-106a-5p	ENSG00000054267	6.09415e-08	0.68384	CL
ENSG00000245526	hsa-miR-497-5p	ENSG00000154764	6.20278e-08	0.683554	CL
ENSG00000245526	hsa-miR-195-5p	ENSG00000154764	6.20278e-08	0.683554	CL
ENSG00000256073	hsa-miR-155-5p	ENSG00000144746	6.28936e-08	0.683329	CL
ENSG00000272168	hsa-miR-203a-3p	ENSG00000105880	6.37672e-08	0.683105	CL
ENSG00000222041	hsa-miR-1-3p	ENSG00000198805	6.43331e-08	0.682961	CL
ENSG00000215424	hsa-miR-130b-3p	ENSG00000173531	6.5296e-08	0.68272	CL
ENSG00000267586	hsa-miR-455-5p	ENSG00000182179	6.54653e-08	0.682678	CL
ENSG00000260032	hsa-miR-155-5p	ENSG00000146587	7.153e-08	0.681232	CL
ENSG00000226137	hsa-miR-143-3p	ENSG00000124782	7.19042e-08	0.681146	CL
ENSG00000267106	hsa-miR-138-5p	ENSG00000107262	8.41227e-08	0.678564	CL
ENSG00000218510	hsa-miR-335-5p	ENSG00000184182	8.59111e-08	0.678215	CL
ENSG00000231419	hsa-miR-122-5p	ENSG00000138439	8.59809e-08	0.678202	CL
ENSG00000175061	hsa-miR-199a-5p	ENSG00000110801	8.73147e-08	0.677947	CL
ENSG00000203930	hsa-miR-218-5p	ENSG00000164327	8.74582e-08	0.67792	CL
ENSG00000178977	hsa-miR-106a-5p	ENSG00000085871	8.76646e-08	0.677881	CL
ENSG00000225791	hsa-miR-204-5p	ENSG00000120742	8.84612e-08	0.677731	CL
ENSG00000153187	hsa-miR-106a-5p	ENSG00000054267	8.87555e-08	0.677675	CL
ENSG00000088340	hsa-miR-1-3p	ENSG00000112715	8.93316e-08	0.677568	CL
ENSG00000088340	hsa-miR-150-5p	ENSG00000112715	8.93316e-08	0.677568	CL
ENSG00000088340	hsa-miR-106a-5p	ENSG00000112715	8.93316e-08	0.677568	CL
ENSG00000088340	hsa-miR-34a-5p	ENSG00000112715	8.93316e-08	0.677568	CL
ENSG00000088340	hsa-miR-107	ENSG00000112715	8.93316e-08	0.677568	CL
ENSG00000088340	hsa-miR-206	ENSG00000112715	8.93316e-08	0.677568	CL
ENSG00000229619	hsa-miR-101-3p	ENSG00000051382	9.10354e-08	0.677254	CL
ENSG00000206337	hsa-miR-17-5p	ENSG00000239697	9.43566e-08	0.676658	CL
ENSG00000269293	hsa-miR-485-5p	ENSG00000137312	9.78399e-08	0.676053	CL
ENSG00000248698	hsa-miR-320a	ENSG00000171885	1.00864e-07	0.675544	CL
ENSG00000248698	hsa-miR-29b-3p	ENSG00000171885	1.00864e-07	0.675544	CL
ENSG00000228784	hsa-miR-31-5p	ENSG00000240654	1.05463e-07	0.674797	CL
ENSG00000232656	hsa-miR-34c-5p	ENSG00000145335	1.11835e-07	0.673811	CL
ENSG00000230844	hsa-miR-490-3p	ENSG00000125991	1.15048e-07	0.673333	CL
ENSG00000228486	hsa-miR-338-3p	ENSG00000102125	1.15969e-07	0.673199	CL
ENSG00000258867	hsa-miR-185-5p	ENSG00000110324	1.17223e-07	0.673017	CL
ENSG00000272168	hsa-miR-137	ENSG00000170396	1.18307e-07	0.672862	CL
ENSG00000235703	hsa-miR-124-3p	ENSG00000245532	1.18905e-07	0.672776	CL
ENSG00000225470	hsa-miR-145-5p	ENSG00000000003	1.19653e-07	0.67267	CL
ENSG00000237984	hsa-miR-21-5p	ENSG00000182568	1.19757e-07	0.672656	CL
ENSG00000237984	hsa-miR-448	ENSG00000182568	1.19757e-07	0.672656	CL
ENSG00000214106	hsa-miR-145-5p	ENSG00000124782	1.21618e-07	0.672395	CL
ENSG00000260032	hsa-miR-155-5p	ENSG00000118689	1.22224e-07	0.67231	CL
ENSG00000260032	hsa-miR-182-5p	ENSG00000118689	1.22224e-07	0.67231	CL
ENSG00000260032	hsa-miR-222-3p	ENSG00000118689	1.22224e-07	0.67231	CL
ENSG00000260032	hsa-miR-221-3p	ENSG00000118689	1.22224e-07	0.67231	CL
ENSG00000177640	hsa-miR-155-5p	ENSG00000118690	1.2547e-07	0.671866	CL
ENSG00000206337	hsa-miR-758-3p	ENSG00000164342	1.25707e-07	0.671834	CL
ENSG00000179314	hsa-miR-302d-3p	ENSG00000095015	1.28857e-07	0.671414	CL
ENSG00000179314	hsa-miR-302a-3p	ENSG00000095015	1.28857e-07	0.671414	CL
ENSG00000179314	hsa-miR-302b-3p	ENSG00000095015	1.28857e-07	0.671414	CL
ENSG00000179314	hsa-miR-302c-3p	ENSG00000095015	1.28857e-07	0.671414	CL
ENSG00000227487	hsa-miR-125b-5p	ENSG00000172943	1.28908e-07	0.671407	CL
ENSG00000226137	hsa-miR-520c-3p	ENSG00000114867	1.30894e-07	0.671147	CL
ENSG00000234420	hsa-miR-129-5p	ENSG00000185591	1.34951e-07	0.670627	CL
ENSG00000215424	hsa-miR-15a-5p	ENSG00000135164	1.38367e-07	0.6702	CL
ENSG00000245060	hsa-miR-26b-5p	ENSG00000141741	1.4217e-07	0.669737	CL
ENSG00000218510	hsa-miR-19a-3p	ENSG00000114383	1.42554e-07	0.669691	CL
ENSG00000218510	hsa-miR-378a-3p	ENSG00000114383	1.42554e-07	0.669691	CL
ENSG00000220575	hsa-miR-152-3p	ENSG00000110148	1.42675e-07	0.669676	CL
ENSG00000220575	hsa-miR-148b-3p	ENSG00000110148	1.42675e-07	0.669676	CL
ENSG00000220575	hsa-miR-148a-3p	ENSG00000110148	1.42675e-07	0.669676	CL
ENSG00000260032	hsa-miR-26b-5p	ENSG00000155506	1.42688e-07	0.669675	CL
ENSG00000260032	hsa-miR-26a-5p	ENSG00000155506	1.42688e-07	0.669675	CL
ENSG00000267106	hsa-miR-146a-5p	ENSG00000198612	1.43941e-07	0.669525	CL
ENSG00000222041	hsa-miR-206	ENSG00000108691	1.44059e-07	0.669511	CL
ENSG00000222041	hsa-miR-1-3p	ENSG00000108691	1.44059e-07	0.669511	CL
ENSG00000088340	hsa-miR-103a-3p	ENSG00000013588	1.44276e-07	0.669485	CL
ENSG00000214353	hsa-miR-155-5p	ENSG00000118690	1.54138e-07	0.66835	CL
ENSG00000237984	hsa-miR-29c-3p	ENSG00000117020	1.61045e-07	0.667596	CL
ENSG00000237984	hsa-miR-20b-5p	ENSG00000117020	1.61045e-07	0.667596	CL
ENSG00000237984	hsa-miR-29b-3p	ENSG00000117020	1.61045e-07	0.667596	CL
ENSG00000237984	hsa-miR-519d-3p	ENSG00000117020	1.61045e-07	0.667596	CL
ENSG00000237984	hsa-miR-29a-3p	ENSG00000117020	1.61045e-07	0.667596	CL
ENSG00000243701	hsa-miR-302a-3p	ENSG00000183283	1.65129e-07	0.667163	CL
ENSG00000234883	hsa-miR-33a-5p	ENSG00000175592	1.68097e-07	0.666855	CL
ENSG00000178977	hsa-miR-106a-5p	ENSG00000197548	1.68254e-07	0.666839	CL
ENSG00000240498	hsa-miR-15a-5p	ENSG00000147883	1.74879e-07	0.66617	CL
ENSG00000206337	hsa-miR-106b-5p	ENSG00000064012	1.89164e-07	0.664805	CL
ENSG00000206337	hsa-miR-376a-3p	ENSG00000064012	1.89164e-07	0.664805	CL
ENSG00000206337	hsa-miR-146a-5p	ENSG00000137462	1.91952e-07	0.66455	CL
ENSG00000206337	hsa-miR-143-3p	ENSG00000137462	1.91952e-07	0.66455	CL
ENSG00000232973	hsa-miR-27b-3p	ENSG00000138061	1.95256e-07	0.664252	CL
ENSG00000153187	hsa-miR-511-5p	ENSG00000122779	1.97267e-07	0.664073	CL
ENSG00000237737	hsa-miR-7-5p	ENSG00000145335	1.98515e-07	0.663963	CL
ENSG00000237149	hsa-miR-106a-5p	ENSG00000085871	1.98768e-07	0.663941	CL
ENSG00000229619	hsa-miR-30a-5p	ENSG00000152601	2.00033e-07	0.66383	CL
ENSG00000229619	hsa-miR-30e-5p	ENSG00000152601	2.00033e-07	0.66383	CL
ENSG00000229619	hsa-miR-30b-5p	ENSG00000152601	2.00033e-07	0.66383	CL
ENSG00000226137	hsa-miR-143-3p	ENSG00000157764	2.00265e-07	0.663809	CL
ENSG00000222041	hsa-miR-106a-5p	ENSG00000137869	2.01187e-07	0.663729	CL
ENSG00000224687	hsa-miR-186-5p	ENSG00000101349	2.01324e-07	0.663717	CL
ENSG00000175061	hsa-miR-192-5p	ENSG00000167842	2.02578e-07	0.663608	CL
ENSG00000203499	hsa-miR-221-3p	ENSG00000007908	2.03389e-07	0.663538	CL
ENSG00000203499	hsa-miR-222-3p	ENSG00000007908	2.03389e-07	0.663538	CL
ENSG00000277147	hsa-miR-155-5p	ENSG00000144746	2.05793e-07	0.663333	CL
ENSG00000277147	hsa-miR-145-5p	ENSG00000144746	2.05793e-07	0.663333	CL
ENSG00000222041	hsa-miR-129-5p	ENSG00000168398	2.10917e-07	0.662901	CL
ENSG00000226287	hsa-miR-7-5p	ENSG00000145335	2.18114e-07	0.662312	CL
ENSG00000272168	hsa-miR-140-5p	ENSG00000124766	2.21823e-07	0.662015	CL
ENSG00000272168	hsa-miR-132-3p	ENSG00000124766	2.21823e-07	0.662015	CL
ENSG00000272168	hsa-miR-138-5p	ENSG00000124766	2.21823e-07	0.662015	CL
ENSG00000272168	hsa-miR-212-3p	ENSG00000124766	2.21823e-07	0.662015	CL
ENSG00000272168	hsa-miR-338-3p	ENSG00000124766	2.21823e-07	0.662015	CL
ENSG00000255198	hsa-miR-21-5p	ENSG00000110801	2.2428e-07	0.661821	CL
ENSG00000259134	hsa-miR-200b-3p	ENSG00000128052	2.29053e-07	0.661449	CL
ENSG00000259134	hsa-miR-200c-3p	ENSG00000128052	2.29053e-07	0.661449	CL
ENSG00000214106	hsa-miR-542-3p	ENSG00000155760	2.4792e-07	0.660048	CL
ENSG00000214106	hsa-miR-145-5p	ENSG00000155760	2.4792e-07	0.660048	CL
ENSG00000214106	hsa-miR-485-5p	ENSG00000155760	2.4792e-07	0.660048	CL
ENSG00000214106	hsa-miR-27b-3p	ENSG00000155760	2.4792e-07	0.660048	CL
ENSG00000260339	hsa-miR-155-5p	ENSG00000046653	2.55245e-07	0.659531	CL
ENSG00000206337	hsa-miR-23a-3p	ENSG00000125347	2.71972e-07	0.658401	CL
ENSG00000206337	hsa-miR-383-5p	ENSG00000125347	2.71972e-07	0.658401	CL
ENSG00000225791	hsa-miR-221-3p	ENSG00000134970	2.73107e-07	0.658326	CL
ENSG00000225791	hsa-miR-181b-5p	ENSG00000134970	2.73107e-07	0.658326	CL
ENSG00000225791	hsa-miR-24-3p	ENSG00000134970	2.73107e-07	0.658326	CL
ENSG00000179840	hsa-miR-24-3p	ENSG00000102879	2.7504e-07	0.6582	CL
ENSG00000203930	hsa-miR-182-5p	ENSG00000102678	2.77205e-07	0.65806	CL
ENSG00000255693	hsa-miR-182-5p	ENSG00000102678	2.86923e-07	0.657443	CL
ENSG00000255693	hsa-miR-26a-5p	ENSG00000102678	2.86923e-07	0.657443	CL
ENSG00000269293	hsa-miR-23b-3p	ENSG00000145782	2.90271e-07	0.657236	CL
ENSG00000230844	hsa-miR-204-5p	ENSG00000070831	2.9627e-07	0.656868	CL
ENSG00000230844	hsa-miR-185-5p	ENSG00000070831	2.9627e-07	0.656868	CL
ENSG00000234741	hsa-miR-103a-2-5p	ENSG00000114209	3.17396e-07	0.655629	CL
ENSG00000206337	hsa-miR-125b-5p	ENSG00000161405	3.22135e-07	0.655362	CL
ENSG00000236824	hsa-miR-107	ENSG00000173267	3.25753e-07	0.65516	CL
ENSG00000236824	hsa-miR-103a-3p	ENSG00000173267	3.25753e-07	0.65516	CL
ENSG00000236824	hsa-miR-4722-5p	ENSG00000173267	3.25753e-07	0.65516	CL
ENSG00000233098	hsa-miR-21-5p	ENSG00000140416	3.28168e-07	0.655026	CL
ENSG00000156273	hsa-miR-24-3p	ENSG00000171940	3.35064e-07	0.65465	CL
ENSG00000268471	hsa-miR-15a-5p	ENSG00000109079	3.38189e-07	0.654482	CL
ENSG00000269293	hsa-miR-200a-3p	ENSG00000256060	3.42463e-07	0.654254	CL
ENSG00000269293	hsa-miR-141-3p	ENSG00000256060	3.42463e-07	0.654254	CL
ENSG00000222041	hsa-miR-1-3p	ENSG00000205542	3.47261e-07	0.654002	CL
ENSG00000228486	hsa-miR-15a-5p	ENSG00000135164	3.47839e-07	0.653972	CL
ENSG00000206337	hsa-miR-106b-5p	ENSG00000104689	3.51136e-07	0.653801	CL
ENSG00000245060	hsa-miR-181b-5p	ENSG00000118785	3.52293e-07	0.653741	CL
ENSG00000152931	hsa-miR-184	ENSG00000166501	3.5356e-07	0.653676	CL
ENSG00000152931	hsa-miR-33a-5p	ENSG00000166501	3.5356e-07	0.653676	CL
ENSG00000222041	hsa-miR-24-3p	ENSG00000143546	3.68204e-07	0.652937	CL
ENSG00000245060	hsa-miR-505-3p	ENSG00000101843	3.70988e-07	0.6528	CL
ENSG00000231419	hsa-miR-122-5p	ENSG00000149294	3.84387e-07	0.652153	CL
ENSG00000237149	hsa-miR-22-3p	ENSG00000214114	3.85182e-07	0.652115	CL
ENSG00000204650	hsa-let-7e-5p	ENSG00000134323	3.94637e-07	0.651672	CL
ENSG00000204650	hsa-miR-103a-3p	ENSG00000134323	3.94637e-07	0.651672	CL
ENSG00000280780	hsa-miR-30a-5p	ENSG00000002586	3.95396e-07	0.651636	CL
ENSG00000206337	hsa-miR-29a-3p	ENSG00000123609	3.96025e-07	0.651607	CL
ENSG00000245060	hsa-miR-204-5p	ENSG00000140941	4.07617e-07	0.651079	CL
ENSG00000175061	hsa-miR-138-5p	ENSG00000107262	4.1023e-07	0.650961	CL
ENSG00000234420	hsa-miR-211-5p	ENSG00000102908	4.13028e-07	0.650837	CL
ENSG00000234420	hsa-miR-146a-5p	ENSG00000102908	4.13028e-07	0.650837	CL
ENSG00000227487	hsa-miR-18b-5p	ENSG00000100354	4.1375e-07	0.650805	CL
ENSG00000204623	hsa-miR-200c-3p	ENSG00000251562	4.14899e-07	0.650754	CL
ENSG00000204623	hsa-miR-141-3p	ENSG00000251562	4.14899e-07	0.650754	CL
ENSG00000204623	hsa-miR-200b-3p	ENSG00000251562	4.14899e-07	0.650754	CL
ENSG00000204623	hsa-miR-200a-3p	ENSG00000251562	4.14899e-07	0.650754	CL
ENSG00000204623	hsa-miR-429	ENSG00000251562	4.14899e-07	0.650754	CL
ENSG00000204623	hsa-miR-202-3p	ENSG00000251562	4.14899e-07	0.650754	CL
ENSG00000255693	hsa-miR-186-5p	ENSG00000101349	4.22643e-07	0.650414	CL
ENSG00000204650	hsa-let-7i-5p	ENSG00000139352	4.27618e-07	0.650199	CL
ENSG00000237984	hsa-miR-130b-3p	ENSG00000198719	4.34001e-07	0.649926	CL
ENSG00000222041	hsa-miR-106a-5p	ENSG00000169429	4.38688e-07	0.649728	CL
ENSG00000177410	hsa-miR-205-5p	ENSG00000167815	4.55053e-07	0.649052	CL
ENSG00000260032	hsa-miR-25-3p	ENSG00000174437	4.68116e-07	0.648529	CL
ENSG00000225470	hsa-miR-29c-3p	ENSG00000070831	4.72472e-07	0.648357	CL
ENSG00000225470	hsa-miR-224-5p	ENSG00000070831	4.72472e-07	0.648357	CL
ENSG00000225470	hsa-miR-29b-3p	ENSG00000070831	4.72472e-07	0.648357	CL
ENSG00000225470	hsa-miR-29a-3p	ENSG00000070831	4.72472e-07	0.648357	CL
ENSG00000225470	hsa-miR-204-5p	ENSG00000070831	4.72472e-07	0.648357	CL
ENSG00000225470	hsa-miR-216a-5p	ENSG00000070831	4.72472e-07	0.648357	CL
ENSG00000245060	hsa-miR-150-5p	ENSG00000141480	4.78222e-07	0.648133	CL
ENSG00000237149	hsa-miR-106a-5p	ENSG00000026103	4.95375e-07	0.647479	CL
ENSG00000216775	hsa-miR-23b-3p	ENSG00000138757	5.05456e-07	0.647104	CL
ENSG00000206337	hsa-miR-221-3p	ENSG00000121858	5.16016e-07	0.646719	CL
ENSG00000206337	hsa-miR-25-3p	ENSG00000121858	5.16016e-07	0.646719	CL
ENSG00000206337	hsa-miR-222-3p	ENSG00000121858	5.16016e-07	0.646719	CL
ENSG00000231419	hsa-miR-140-5p	ENSG00000102678	5.20275e-07	0.646566	CL
ENSG00000216775	hsa-miR-339-5p	ENSG00000139910	5.22333e-07	0.646492	CL
ENSG00000177112	hsa-miR-98-5p	ENSG00000136634	5.23496e-07	0.646451	CL
ENSG00000177112	hsa-miR-19a-3p	ENSG00000136634	5.23496e-07	0.646451	CL
ENSG00000177112	hsa-let-7c-5p	ENSG00000136634	5.23496e-07	0.646451	CL
ENSG00000177640	hsa-miR-155-5p	ENSG00000123575	5.39664e-07	0.645883	CL
ENSG00000272168	hsa-miR-128-3p	ENSG00000154928	5.39723e-07	0.645881	CL
ENSG00000245573	hsa-miR-142-3p	ENSG00000115008	5.40963e-07	0.645838	CL
ENSG00000260032	hsa-miR-142-3p	ENSG00000134318	5.87087e-07	0.644304	CL
ENSG00000245060	hsa-miR-194-5p	ENSG00000136634	5.89807e-07	0.644217	CL
ENSG00000179314	hsa-miR-708-5p	ENSG00000105221	5.91531e-07	0.644162	CL
ENSG00000179314	hsa-miR-124-3p	ENSG00000105221	5.91531e-07	0.644162	CL
ENSG00000179314	hsa-miR-302b-3p	ENSG00000105221	5.91531e-07	0.644162	CL
ENSG00000178977	hsa-miR-9-5p	ENSG00000113328	5.9322e-07	0.644108	CL
ENSG00000220575	hsa-miR-376a-3p	ENSG00000123612	6.04389e-07	0.643757	CL
ENSG00000220575	hsa-miR-376b-3p	ENSG00000123612	6.04389e-07	0.643757	CL
ENSG00000280798	hsa-miR-374a-5p	ENSG00000277363	6.07796e-07	0.643651	CL
ENSG00000178977	hsa-miR-335-5p	ENSG00000184182	6.08852e-07	0.643619	CL
ENSG00000179840	hsa-miR-24-3p	ENSG00000105329	6.22385e-07	0.643204	CL
ENSG00000215424	hsa-miR-155-5p	ENSG00000134698	6.5382e-07	0.642272	CL
ENSG00000272168	hsa-miR-29a-3p	ENSG00000164604	6.61768e-07	0.642044	CL
ENSG00000154537	hsa-miR-125b-5p	ENSG00000130427	6.6751e-07	0.64188	CL
ENSG00000236824	hsa-miR-107	ENSG00000107295	6.76816e-07	0.641617	CL
ENSG00000277147	hsa-miR-199a-5p	ENSG00000110801	6.93203e-07	0.641163	CL
ENSG00000177410	hsa-miR-195-5p	ENSG00000070831	6.94588e-07	0.641125	CL
ENSG00000222041	hsa-miR-485-5p	ENSG00000137312	7.02933e-07	0.640897	CL
ENSG00000179840	hsa-miR-98-5p	ENSG00000271503	7.03566e-07	0.64088	CL
ENSG00000228784	hsa-miR-203a-3p	ENSG00000172936	7.15892e-07	0.64055	CL
ENSG00000228784	hsa-miR-155-5p	ENSG00000172936	7.15892e-07	0.64055	CL
ENSG00000206337	hsa-miR-758-3p	ENSG00000196664	7.20214e-07	0.640435	CL
ENSG00000206337	hsa-miR-17-5p	ENSG00000196664	7.20214e-07	0.640435	CL
ENSG00000206337	hsa-miR-181a-5p	ENSG00000134242	7.29656e-07	0.640186	CL
ENSG00000237984	hsa-miR-29b-3p	ENSG00000134323	7.44227e-07	0.639809	CL
ENSG00000237984	hsa-miR-34c-5p	ENSG00000134323	7.44227e-07	0.639809	CL
ENSG00000237984	hsa-miR-29a-3p	ENSG00000134323	7.44227e-07	0.639809	CL
ENSG00000237984	hsa-miR-19b-3p	ENSG00000134323	7.44227e-07	0.639809	CL
ENSG00000237984	hsa-miR-19a-3p	ENSG00000134323	7.44227e-07	0.639809	CL
ENSG00000237984	hsa-miR-29c-3p	ENSG00000134323	7.44227e-07	0.639809	CL
ENSG00000256073	hsa-miR-155-5p	ENSG00000067560	7.78283e-07	0.638953	CL
ENSG00000178977	hsa-miR-493-5p	ENSG00000155366	7.90696e-07	0.638649	CL
ENSG00000228784	hsa-miR-143-3p	ENSG00000119772	8.05351e-07	0.638297	CL
ENSG00000228784	hsa-miR-200c-3p	ENSG00000119772	8.05351e-07	0.638297	CL
ENSG00000228784	hsa-miR-200b-3p	ENSG00000119772	8.05351e-07	0.638297	CL
ENSG00000228784	hsa-miR-29a-3p	ENSG00000119772	8.05351e-07	0.638297	CL
ENSG00000218510	hsa-miR-214-3p	ENSG00000101843	8.07351e-07	0.638249	CL
ENSG00000223773	hsa-miR-223-3p	ENSG00000136244	8.09154e-07	0.638206	CL
ENSG00000223773	hsa-miR-9-5p	ENSG00000136244	8.09154e-07	0.638206	CL
ENSG00000223773	hsa-miR-125a-3p	ENSG00000136244	8.09154e-07	0.638206	CL
ENSG00000223773	hsa-miR-149-5p	ENSG00000136244	8.09154e-07	0.638206	CL
ENSG00000247095	hsa-miR-106a-5p	ENSG00000059804	8.32067e-07	0.637669	CL
ENSG00000220575	hsa-miR-181b-5p	ENSG00000163032	8.47291e-07	0.63732	CL
ENSG00000260339	hsa-miR-21-5p	ENSG00000120885	8.52324e-07	0.637205	CL
ENSG00000273032	hsa-miR-873-5p	ENSG00000277363	8.60614e-07	0.637019	CL
ENSG00000273032	hsa-miR-346	ENSG00000277363	8.60614e-07	0.637019	CL
ENSG00000269293	hsa-miR-23b-3p	ENSG00000165672	8.61588e-07	0.636997	CL
ENSG00000248698	hsa-miR-335-5p	ENSG00000172201	8.83723e-07	0.636507	CL
ENSG00000274956	hsa-miR-128-3p	ENSG00000154928	8.85685e-07	0.636464	CL
ENSG00000177853	hsa-miR-106a-5p	ENSG00000054267	8.88527e-07	0.636402	CL
ENSG00000177640	hsa-miR-23b-3p	ENSG00000152661	8.95265e-07	0.636256	CL
ENSG00000177640	hsa-miR-1-3p	ENSG00000152661	8.95265e-07	0.636256	CL
ENSG00000177640	hsa-miR-20a-5p	ENSG00000152661	8.95265e-07	0.636256	CL
ENSG00000177640	hsa-miR-218-5p	ENSG00000152661	8.95265e-07	0.636256	CL
ENSG00000177640	hsa-miR-186-5p	ENSG00000152661	8.95265e-07	0.636256	CL
ENSG00000177640	hsa-miR-206	ENSG00000152661	8.95265e-07	0.636256	CL
ENSG00000177640	hsa-miR-200a-3p	ENSG00000152661	8.95265e-07	0.636256	CL
ENSG00000177640	hsa-miR-381-3p	ENSG00000152661	8.95265e-07	0.636256	CL
ENSG00000177640	hsa-miR-221-3p	ENSG00000152661	8.95265e-07	0.636256	CL
ENSG00000273032	hsa-miR-34c-5p	ENSG00000011677	8.96451e-07	0.63623	CL
ENSG00000179314	hsa-miR-330-5p	ENSG00000184588	9.03323e-07	0.636082	CL
ENSG00000243701	hsa-miR-21-5p	ENSG00000120885	9.14527e-07	0.635844	CL
ENSG00000267454	hsa-miR-21-5p	ENSG00000110801	9.2381e-07	0.635648	CL
ENSG00000206337	hsa-miR-125b-5p	ENSG00000012779	9.28302e-07	0.635554	CL
ENSG00000223839	hsa-miR-29b-3p	ENSG00000102996	9.3264e-07	0.635463	CL
ENSG00000223839	hsa-miR-29c-3p	ENSG00000102996	9.3264e-07	0.635463	CL
ENSG00000267106	hsa-miR-17-5p	ENSG00000239697	9.38911e-07	0.635333	CL
ENSG00000206337	hsa-miR-181a-5p	ENSG00000010610	9.99296e-07	0.63412	CL
ENSG00000258867	hsa-miR-205-5p	ENSG00000008517	1.00285e-06	0.634051	CL
ENSG00000260032	hsa-miR-92a-3p	ENSG00000130703	1.00862e-06	0.633939	CL
ENSG00000245060	hsa-miR-124-3p	ENSG00000245848	1.01875e-06	0.633744	CL
ENSG00000245060	hsa-miR-181a-5p	ENSG00000245848	1.01875e-06	0.633744	CL
ENSG00000258708	hsa-miR-146a-5p	ENSG00000163914	1.02594e-06	0.633607	CL
ENSG00000205704	hsa-miR-342-3p	ENSG00000228408	1.04194e-06	0.633305	CL
ENSG00000234420	hsa-miR-146a-5p	ENSG00000029363	1.04948e-06	0.633163	CL
ENSG00000247982	hsa-miR-130b-3p	ENSG00000173531	1.05179e-06	0.63312	CL
ENSG00000228223	hsa-miR-106a-5p	ENSG00000198053	1.07526e-06	0.632688	CL
ENSG00000245067	hsa-miR-381-3p	ENSG00000152661	1.08174e-06	0.63257	CL
ENSG00000245067	hsa-miR-186-5p	ENSG00000152661	1.08174e-06	0.63257	CL
ENSG00000280780	hsa-miR-335-5p	ENSG00000181788	1.11658e-06	0.631948	CL
ENSG00000156273	hsa-miR-372-3p	ENSG00000150457	1.1184e-06	0.631916	CL
ENSG00000156273	hsa-miR-373-3p	ENSG00000150457	1.1184e-06	0.631916	CL
ENSG00000156273	hsa-miR-93-5p	ENSG00000150457	1.1184e-06	0.631916	CL
ENSG00000245060	hsa-miR-224-5p	ENSG00000158793	1.14361e-06	0.631478	CL
ENSG00000230006	hsa-miR-185-5p	ENSG00000172350	1.15251e-06	0.631325	CL
ENSG00000234636	hsa-miR-106a-5p	ENSG00000085871	1.17278e-06	0.630982	CL
ENSG00000234883	hsa-miR-155-5p	ENSG00000182718	1.19983e-06	0.630532	CL
ENSG00000231290	hsa-miR-23b-3p	ENSG00000122861	1.21384e-06	0.630302	CL
ENSG00000247240	hsa-let-7f-5p	ENSG00000169727	1.22017e-06	0.630199	CL
ENSG00000247240	hsa-let-7i-5p	ENSG00000169727	1.22017e-06	0.630199	CL
ENSG00000247240	hsa-let-7c-5p	ENSG00000169727	1.22017e-06	0.630199	CL
ENSG00000222041	hsa-miR-320a	ENSG00000213585	1.23671e-06	0.629933	CL
ENSG00000177640	hsa-miR-143-3p	ENSG00000132470	1.2529e-06	0.629676	CL
ENSG00000236901	hsa-miR-106a-5p	ENSG00000177169	1.26991e-06	0.629408	CL
ENSG00000171101	hsa-miR-9-5p	ENSG00000028277	1.28144e-06	0.629229	CL
ENSG00000245526	hsa-miR-92a-3p	ENSG00000114166	1.28614e-06	0.629156	CL
ENSG00000245526	hsa-miR-32-5p	ENSG00000114166	1.28614e-06	0.629156	CL
ENSG00000245526	hsa-miR-25-3p	ENSG00000114166	1.28614e-06	0.629156	CL
ENSG00000228784	hsa-miR-155-5p	ENSG00000010818	1.29782e-06	0.628977	CL
ENSG00000177853	hsa-miR-106a-5p	ENSG00000149311	1.31078e-06	0.62878	CL
ENSG00000218510	hsa-miR-22-3p	ENSG00000162704	1.32139e-06	0.628619	CL
ENSG00000258867	hsa-miR-370-3p	ENSG00000107968	1.32441e-06	0.628574	CL
ENSG00000206337	hsa-miR-155-5p	ENSG00000066336	1.32517e-06	0.628563	CL
ENSG00000206337	hsa-miR-424-5p	ENSG00000066336	1.32517e-06	0.628563	CL
ENSG00000225470	hsa-miR-24-3p	ENSG00000130741	1.36787e-06	0.627931	CL
ENSG00000226137	hsa-miR-520e	ENSG00000178951	1.37041e-06	0.627894	CL
ENSG00000177112	hsa-miR-346	ENSG00000150782	1.37578e-06	0.627816	CL
ENSG00000215417	hsa-miR-146a-5p	ENSG00000139618	1.38868e-06	0.62763	CL
ENSG00000258867	hsa-miR-146a-5p	ENSG00000124107	1.39145e-06	0.62759	CL
ENSG00000237984	hsa-miR-10b-5p	ENSG00000183117	1.40526e-06	0.627393	CL
ENSG00000204650	hsa-miR-27b-3p	ENSG00000168958	1.40781e-06	0.627357	CL
ENSG00000247271	hsa-miR-491-5p	ENSG00000166337	1.41175e-06	0.627301	CL
ENSG00000234390	hsa-miR-30c-5p	ENSG00000138823	1.42571e-06	0.627104	CL
ENSG00000234390	hsa-miR-30e-5p	ENSG00000138823	1.42571e-06	0.627104	CL
ENSG00000235703	hsa-miR-203a-3p	ENSG00000149311	1.42721e-06	0.627083	CL
ENSG00000235703	hsa-miR-181b-5p	ENSG00000149311	1.42721e-06	0.627083	CL
ENSG00000235703	hsa-miR-181a-5p	ENSG00000149311	1.42721e-06	0.627083	CL
ENSG00000235703	hsa-miR-101-3p	ENSG00000149311	1.42721e-06	0.627083	CL
ENSG00000235703	hsa-miR-223-3p	ENSG00000149311	1.42721e-06	0.627083	CL
ENSG00000249464	hsa-miR-1-3p	ENSG00000117519	1.42827e-06	0.627069	CL
ENSG00000260852	hsa-miR-145-5p	ENSG00000274211	1.45517e-06	0.626695	CL
ENSG00000267106	hsa-miR-106a-5p	ENSG00000012061	1.45625e-06	0.62668	CL
ENSG00000277147	hsa-miR-155-5p	ENSG00000169021	1.47578e-06	0.626414	CL
ENSG00000222041	hsa-miR-24-3p	ENSG00000100292	1.47801e-06	0.626383	CL
ENSG00000231028	hsa-miR-204-5p	ENSG00000092820	1.47919e-06	0.626367	CL
ENSG00000248019	hsa-miR-129-5p	ENSG00000114770	1.50476e-06	0.626024	CL
ENSG00000267106	hsa-miR-203a-3p	ENSG00000132341	1.51458e-06	0.625893	CL
ENSG00000212766	hsa-miR-204-5p	ENSG00000160183	1.5308e-06	0.625679	CL
ENSG00000206337	hsa-miR-155-5p	ENSG00000115415	1.53712e-06	0.625596	CL
ENSG00000206337	hsa-miR-146a-5p	ENSG00000115415	1.53712e-06	0.625596	CL
ENSG00000206337	hsa-miR-203a-3p	ENSG00000115415	1.53712e-06	0.625596	CL
ENSG00000206337	hsa-miR-140-5p	ENSG00000115415	1.53712e-06	0.625596	CL
ENSG00000206337	hsa-miR-150-5p	ENSG00000115415	1.53712e-06	0.625596	CL
ENSG00000248698	hsa-miR-376a-3p	ENSG00000163884	1.53773e-06	0.625589	CL
ENSG00000177410	hsa-miR-194-5p	ENSG00000100387	1.54015e-06	0.625557	CL
ENSG00000245060	hsa-miR-224-5p	ENSG00000089220	1.59141e-06	0.624898	CL
ENSG00000179314	hsa-miR-22-3p	ENSG00000101144	1.59673e-06	0.624831	CL
ENSG00000179314	hsa-miR-542-3p	ENSG00000101144	1.59673e-06	0.624831	CL
ENSG00000156273	hsa-miR-106b-5p	ENSG00000135842	1.59919e-06	0.6248	CL
ENSG00000156273	hsa-miR-140-5p	ENSG00000135862	1.59951e-06	0.624796	CL
ENSG00000214106	hsa-miR-145-5p	ENSG00000138594	1.61015e-06	0.624662	CL
ENSG00000245573	hsa-miR-10a-5p	ENSG00000121653	1.62805e-06	0.624439	CL
ENSG00000186594	hsa-miR-1-3p	ENSG00000182718	1.62973e-06	0.624418	CL
ENSG00000186594	hsa-miR-206	ENSG00000182718	1.62973e-06	0.624418	CL
ENSG00000186594	hsa-miR-133a-3p	ENSG00000182718	1.62973e-06	0.624418	CL
ENSG00000267106	hsa-miR-212-3p	ENSG00000198001	1.63621e-06	0.624338	CL
ENSG00000267106	hsa-miR-132-3p	ENSG00000198001	1.63621e-06	0.624338	CL
ENSG00000230844	hsa-miR-141-3p	ENSG00000151247	1.65548e-06	0.624102	CL
ENSG00000206337	hsa-miR-20a-5p	ENSG00000168310	1.65607e-06	0.624095	CL
ENSG00000206337	hsa-miR-18a-5p	ENSG00000168310	1.65607e-06	0.624095	CL
ENSG00000223773	hsa-miR-17-5p	ENSG00000120885	1.68348e-06	0.623763	CL
ENSG00000171101	hsa-miR-214-3p	ENSG00000271503	1.70356e-06	0.623523	CL
ENSG00000152931	hsa-miR-320a	ENSG00000006128	1.70509e-06	0.623505	CL
ENSG00000223773	hsa-miR-29b-3p	ENSG00000160307	1.72167e-06	0.623309	CL
ENSG00000223773	hsa-miR-29a-3p	ENSG00000160307	1.72167e-06	0.623309	CL
ENSG00000206337	hsa-miR-9-5p	ENSG00000145779	1.74377e-06	0.62305	CL
ENSG00000227487	hsa-miR-143-3p	ENSG00000177463	1.7532e-06	0.622941	CL
ENSG00000177640	hsa-miR-29a-3p	ENSG00000170542	1.79152e-06	0.622502	CL
ENSG00000245060	hsa-miR-7-5p	ENSG00000189043	1.79908e-06	0.622417	CL
ENSG00000255198	hsa-miR-21-5p	ENSG00000103266	1.81566e-06	0.62223	CL
ENSG00000273032	hsa-miR-185-5p	ENSG00000172350	1.82615e-06	0.622113	CL
ENSG00000248698	hsa-miR-29a-3p	ENSG00000160307	1.84653e-06	0.621887	CL
ENSG00000248698	hsa-miR-29b-3p	ENSG00000160307	1.84653e-06	0.621887	CL
ENSG00000273032	hsa-miR-107	ENSG00000168539	1.84901e-06	0.62186	CL
ENSG00000214381	hsa-miR-376a-3p	ENSG00000064012	1.87681e-06	0.621556	CL
ENSG00000214381	hsa-miR-21-5p	ENSG00000064012	1.87681e-06	0.621556	CL
ENSG00000277147	hsa-miR-155-5p	ENSG00000005194	1.89497e-06	0.621359	CL
ENSG00000235597	hsa-miR-302a-3p	ENSG00000139737	1.89644e-06	0.621344	CL
ENSG00000235703	hsa-miR-338-3p	ENSG00000102125	1.91983e-06	0.621093	CL
ENSG00000206337	hsa-miR-200a-3p	ENSG00000010704	1.95852e-06	0.620686	CL
ENSG00000269293	hsa-miR-218-5p	ENSG00000113048	1.95923e-06	0.620679	CL
ENSG00000227487	hsa-miR-10b-5p	ENSG00000148400	1.97846e-06	0.620479	CL
ENSG00000227487	hsa-miR-326	ENSG00000148400	1.97846e-06	0.620479	CL
ENSG00000204282	hsa-miR-32-5p	ENSG00000158715	1.98002e-06	0.620463	CL
ENSG00000247240	hsa-miR-197-3p	ENSG00000132341	2.0053e-06	0.620203	CL
ENSG00000225470	hsa-miR-335-5p	ENSG00000185222	2.00589e-06	0.620197	CL
ENSG00000156273	hsa-miR-20a-5p	ENSG00000084093	2.01712e-06	0.620083	CL
ENSG00000214106	hsa-miR-27b-3p	ENSG00000111424	2.03362e-06	0.619916	CL
ENSG00000243701	hsa-miR-425-5p	ENSG00000010671	2.0471e-06	0.61978	CL
ENSG00000280780	hsa-miR-15a-5p	ENSG00000137309	2.06822e-06	0.61957	CL
ENSG00000280780	hsa-miR-195-5p	ENSG00000137309	2.06822e-06	0.61957	CL
ENSG00000280780	hsa-miR-185-5p	ENSG00000137309	2.06822e-06	0.61957	CL
ENSG00000280780	hsa-miR-16-5p	ENSG00000137309	2.06822e-06	0.61957	CL
ENSG00000277147	hsa-miR-28-5p	ENSG00000107262	2.08414e-06	0.619412	CL
ENSG00000214106	hsa-miR-93-5p	ENSG00000105855	2.10067e-06	0.61925	CL
ENSG00000214106	hsa-miR-145-5p	ENSG00000105855	2.10067e-06	0.61925	CL
ENSG00000206337	hsa-miR-22-3p	ENSG00000168961	2.1681e-06	0.6186	CL
ENSG00000245573	hsa-miR-199a-5p	ENSG00000121900	2.17058e-06	0.618577	CL
ENSG00000249464	hsa-miR-145-5p	ENSG00000143549	2.20253e-06	0.618275	CL
ENSG00000230006	hsa-miR-146a-5p	ENSG00000089250	2.20299e-06	0.618271	CL
ENSG00000204650	hsa-miR-200c-3p	ENSG00000067606	2.20481e-06	0.618254	CL
ENSG00000229619	hsa-miR-23a-3p	ENSG00000081189	2.22319e-06	0.618083	CL
ENSG00000277147	hsa-miR-155-5p	ENSG00000171530	2.22402e-06	0.618075	CL
ENSG00000222041	hsa-miR-106a-5p	ENSG00000085871	2.26528e-06	0.617696	CL
ENSG00000174365	hsa-miR-22-3p	ENSG00000177697	2.27764e-06	0.617583	CL
ENSG00000177640	hsa-miR-16-5p	ENSG00000159713	2.29509e-06	0.617426	CL
ENSG00000171101	hsa-miR-7-5p	ENSG00000171608	2.31317e-06	0.617263	CL
ENSG00000171101	hsa-miR-199a-5p	ENSG00000171608	2.31317e-06	0.617263	CL
ENSG00000245017	hsa-miR-122-5p	ENSG00000165775	2.43623e-06	0.616189	CL
ENSG00000156273	hsa-miR-155-5p	ENSG00000138071	2.49143e-06	0.615723	CL
ENSG00000237737	hsa-miR-15b-5p	ENSG00000136535	2.49768e-06	0.615671	CL
ENSG00000226137	hsa-miR-542-3p	ENSG00000085733	2.50392e-06	0.615619	CL
ENSG00000214106	hsa-miR-21-5p	ENSG00000064012	2.535e-06	0.615363	CL
ENSG00000267278	hsa-miR-1-3p	ENSG00000198804	2.5845e-06	0.61496	CL
ENSG00000153187	hsa-miR-424-5p	ENSG00000169710	2.60118e-06	0.614825	CL
ENSG00000222041	hsa-miR-1-3p	ENSG00000117519	2.62165e-06	0.614662	CL
ENSG00000214381	hsa-miR-326	ENSG00000113578	2.71104e-06	0.613961	CL
ENSG00000215424	hsa-miR-449a	ENSG00000143190	2.7127e-06	0.613948	CL
ENSG00000277147	hsa-miR-129-5p	ENSG00000184182	2.71591e-06	0.613924	CL
ENSG00000243701	hsa-miR-27a-3p	ENSG00000177885	2.72743e-06	0.613835	CL
ENSG00000243701	hsa-miR-200a-3p	ENSG00000177885	2.72743e-06	0.613835	CL
ENSG00000243701	hsa-miR-376c-3p	ENSG00000177885	2.72743e-06	0.613835	CL
ENSG00000175061	hsa-miR-138-5p	ENSG00000155366	2.75709e-06	0.613608	CL
ENSG00000269293	hsa-miR-141-3p	ENSG00000151247	2.76769e-06	0.613528	CL
ENSG00000224975	hsa-miR-125b-5p	ENSG00000179361	2.79269e-06	0.61334	CL
ENSG00000224975	hsa-miR-125a-5p	ENSG00000179361	2.79269e-06	0.61334	CL
ENSG00000088340	hsa-miR-106a-5p	ENSG00000059804	2.79445e-06	0.613326	CL
ENSG00000153187	hsa-miR-539-5p	ENSG00000076382	2.81519e-06	0.613171	CL
ENSG00000229180	hsa-miR-106a-5p	ENSG00000164896	2.8431e-06	0.612964	CL
ENSG00000236333	hsa-miR-141-3p	ENSG00000138378	2.85233e-06	0.612896	CL
ENSG00000223773	hsa-miR-19a-3p	ENSG00000012779	2.8769e-06	0.612716	CL
ENSG00000230844	hsa-miR-185-5p	ENSG00000067560	2.92581e-06	0.612361	CL
ENSG00000230844	hsa-miR-101-3p	ENSG00000067560	2.92581e-06	0.612361	CL
ENSG00000230844	hsa-miR-490-3p	ENSG00000067560	2.92581e-06	0.612361	CL
ENSG00000258708	hsa-miR-181a-5p	ENSG00000156076	2.97811e-06	0.611988	CL
ENSG00000258708	hsa-miR-203a-3p	ENSG00000156076	2.97811e-06	0.611988	CL
ENSG00000175061	hsa-miR-138-5p	ENSG00000074266	2.98783e-06	0.61192	CL
ENSG00000245060	hsa-miR-133a-3p	ENSG00000167397	2.99431e-06	0.611874	CL
ENSG00000204623	hsa-miR-30a-5p	ENSG00000090905	2.99831e-06	0.611846	CL
ENSG00000224975	hsa-miR-155-5p	ENSG00000176953	2.99876e-06	0.611843	CL
ENSG00000214353	hsa-miR-145-5p	ENSG00000108602	3.01606e-06	0.611721	CL
ENSG00000215417	hsa-miR-155-5p	ENSG00000134698	3.03216e-06	0.611609	CL
ENSG00000232021	hsa-miR-149-5p	ENSG00000117560	3.05187e-06	0.611472	CL
ENSG00000258867	hsa-miR-422a	ENSG00000105329	3.10884e-06	0.611082	CL
ENSG00000258867	hsa-miR-15b-5p	ENSG00000105329	3.10884e-06	0.611082	CL
ENSG00000258867	hsa-miR-185-5p	ENSG00000105329	3.10884e-06	0.611082	CL
ENSG00000258867	hsa-miR-146a-5p	ENSG00000105329	3.10884e-06	0.611082	CL
ENSG00000273032	hsa-miR-214-3p	ENSG00000164050	3.16872e-06	0.610678	CL
ENSG00000176840	hsa-miR-185-5p	ENSG00000172350	3.25784e-06	0.610091	CL
ENSG00000272168	hsa-miR-9-5p	ENSG00000119547	3.28361e-06	0.609924	CL
ENSG00000226137	hsa-miR-372-3p	ENSG00000040199	3.30874e-06	0.609762	CL
ENSG00000245526	hsa-miR-384	ENSG00000140538	3.33955e-06	0.609565	CL
ENSG00000245526	hsa-miR-9-5p	ENSG00000140538	3.33955e-06	0.609565	CL
ENSG00000255571	hsa-miR-182-5p	ENSG00000182667	3.35198e-06	0.609486	CL
ENSG00000245573	hsa-miR-326	ENSG00000010278	3.3639e-06	0.609411	CL
ENSG00000269893	hsa-miR-425-5p	ENSG00000114209	3.38309e-06	0.60929	CL
ENSG00000279873	hsa-miR-222-3p	ENSG00000117713	3.39445e-06	0.609219	CL
ENSG00000206337	hsa-miR-22-3p	ENSG00000128604	3.40371e-06	0.609161	CL
ENSG00000180769	hsa-miR-320a	ENSG00000171885	3.5092e-06	0.608511	CL
ENSG00000277147	hsa-miR-155-5p	ENSG00000111229	3.59506e-06	0.607995	CL
ENSG00000226137	hsa-miR-372-3p	ENSG00000104447	3.63196e-06	0.607777	CL
ENSG00000226137	hsa-miR-302d-3p	ENSG00000104447	3.63196e-06	0.607777	CL
ENSG00000227487	hsa-miR-143-3p	ENSG00000110367	3.65661e-06	0.607632	CL
ENSG00000243701	hsa-miR-142-3p	ENSG00000115008	3.69124e-06	0.60743	CL
ENSG00000156273	hsa-miR-224-5p	ENSG00000123094	3.73019e-06	0.607206	CL
ENSG00000257242	hsa-miR-152-3p	ENSG00000117461	3.73258e-06	0.607192	CL
ENSG00000245060	hsa-miR-133b	ENSG00000171552	3.75546e-06	0.607061	CL
ENSG00000245060	hsa-miR-133a-3p	ENSG00000171552	3.75546e-06	0.607061	CL
ENSG00000235703	hsa-miR-15a-5p	ENSG00000135164	3.75922e-06	0.60704	CL
ENSG00000156273	hsa-miR-17-5p	ENSG00000118762	3.81726e-06	0.606711	CL
ENSG00000156273	hsa-miR-106b-5p	ENSG00000118762	3.81726e-06	0.606711	CL
ENSG00000234420	hsa-miR-146b-5p	ENSG00000251562	3.85177e-06	0.606518	CL
ENSG00000258867	hsa-miR-378a-3p	ENSG00000177885	3.85392e-06	0.606506	CL
ENSG00000258867	hsa-miR-433-3p	ENSG00000177885	3.85392e-06	0.606506	CL
ENSG00000214353	hsa-miR-145-5p	ENSG00000174007	3.85888e-06	0.606478	CL
ENSG00000179314	hsa-miR-124-3p	ENSG00000101384	3.89877e-06	0.606257	CL
ENSG00000176124	hsa-miR-206	ENSG00000136518	3.90516e-06	0.606222	CL
ENSG00000260032	hsa-miR-590-3p	ENSG00000134982	3.95892e-06	0.605928	CL
ENSG00000260032	hsa-miR-155-5p	ENSG00000134982	3.95892e-06	0.605928	CL
ENSG00000260032	hsa-miR-142-3p	ENSG00000134982	3.95892e-06	0.605928	CL
ENSG00000230006	hsa-miR-148a-3p	ENSG00000006432	4.0602e-06	0.605385	CL
ENSG00000230006	hsa-miR-148b-3p	ENSG00000006432	4.0602e-06	0.605385	CL
ENSG00000248698	hsa-miR-10a-5p	ENSG00000121653	4.08276e-06	0.605265	CL
ENSG00000268996	hsa-miR-17-5p	ENSG00000170276	4.09048e-06	0.605224	CL
ENSG00000206337	hsa-miR-203a-3p	ENSG00000185745	4.10248e-06	0.605161	CL
ENSG00000205334	hsa-miR-107	ENSG00000168539	4.10565e-06	0.605145	CL
ENSG00000260339	hsa-miR-98-5p	ENSG00000117400	4.19019e-06	0.604705	CL
ENSG00000260339	hsa-let-7f-5p	ENSG00000117400	4.19019e-06	0.604705	CL
ENSG00000260339	hsa-let-7c-5p	ENSG00000117400	4.19019e-06	0.604705	CL
ENSG00000260339	hsa-let-7e-5p	ENSG00000117400	4.19019e-06	0.604705	CL
ENSG00000260339	hsa-let-7a-5p	ENSG00000117400	4.19019e-06	0.604705	CL
ENSG00000260339	hsa-let-7d-5p	ENSG00000117400	4.19019e-06	0.604705	CL
ENSG00000177640	hsa-miR-92a-3p	ENSG00000180628	4.2059e-06	0.604624	CL
ENSG00000236333	hsa-miR-7-5p	ENSG00000145335	4.25155e-06	0.604391	CL
ENSG00000215424	hsa-miR-378a-3p	ENSG00000141068	4.29391e-06	0.604176	CL
ENSG00000230006	hsa-miR-107	ENSG00000100604	4.38592e-06	0.603717	CL
ENSG00000214106	hsa-miR-9-5p	ENSG00000132842	4.40134e-06	0.603641	CL
ENSG00000204650	hsa-miR-27a-3p	ENSG00000196132	4.47006e-06	0.603305	CL
ENSG00000222041	hsa-miR-1-3p	ENSG00000169299	4.48327e-06	0.603241	CL
ENSG00000177640	hsa-miR-155-5p	ENSG00000055208	4.49118e-06	0.603203	CL
ENSG00000177640	hsa-miR-23b-3p	ENSG00000055208	4.49118e-06	0.603203	CL
ENSG00000177640	hsa-miR-342-3p	ENSG00000055208	4.49118e-06	0.603203	CL
ENSG00000231419	hsa-miR-140-5p	ENSG00000124766	4.52861e-06	0.603022	CL
ENSG00000260032	hsa-miR-155-5p	ENSG00000141564	4.53762e-06	0.602979	CL
ENSG00000248698	hsa-miR-128-3p	ENSG00000184371	4.54489e-06	0.602944	CL
ENSG00000153187	hsa-miR-25-3p	ENSG00000174437	4.63e-06	0.602541	CL
ENSG00000234420	hsa-miR-129-5p	ENSG00000140992	4.66181e-06	0.602392	CL
ENSG00000236824	hsa-miR-331-3p	ENSG00000189283	4.66801e-06	0.602363	CL
ENSG00000236824	hsa-miR-143-3p	ENSG00000189283	4.66801e-06	0.602363	CL
ENSG00000214106	hsa-miR-9-5p	ENSG00000112333	4.71566e-06	0.602142	CL
ENSG00000237125	hsa-miR-128-3p	ENSG00000077279	4.72141e-06	0.602115	CL
ENSG00000269293	hsa-miR-181b-5p	ENSG00000118785	4.82439e-06	0.601645	CL
ENSG00000176124	hsa-miR-490-3p	ENSG00000125991	4.82679e-06	0.601634	CL
ENSG00000206337	hsa-miR-92a-3p	ENSG00000185811	4.83325e-06	0.601605	CL
ENSG00000272168	hsa-let-7c-5p	ENSG00000164327	4.83436e-06	0.6016	CL
ENSG00000272168	hsa-miR-128-3p	ENSG00000164327	4.83436e-06	0.6016	CL
ENSG00000260339	hsa-miR-145-5p	ENSG00000151883	4.88187e-06	0.601386	CL
ENSG00000227487	hsa-miR-125b-5p	ENSG00000168769	4.89843e-06	0.601312	CL
ENSG00000260339	hsa-miR-21-5p	ENSG00000177640	4.92914e-06	0.601176	CL
ENSG00000177640	hsa-miR-326	ENSG00000113578	4.987e-06	0.60092	CL
ENSG00000245060	hsa-miR-181a-5p	ENSG00000174775	5.04058e-06	0.600687	CL
ENSG00000245060	hsa-miR-181d-5p	ENSG00000174775	5.04058e-06	0.600687	CL
ENSG00000156273	hsa-miR-194-5p	ENSG00000127947	5.08097e-06	0.600512	CL
ENSG00000223773	hsa-miR-130a-3p	ENSG00000150782	5.08236e-06	0.600506	CL
ENSG00000226950	hsa-miR-145-5p	ENSG00000125821	5.08499e-06	0.600494	CL
ENSG00000206344	hsa-miR-125a-5p	ENSG00000102125	5.09215e-06	0.600464	CL
ENSG00000206344	hsa-miR-141-3p	ENSG00000102125	5.09215e-06	0.600464	CL
ENSG00000206344	hsa-miR-338-3p	ENSG00000102125	5.09215e-06	0.600464	CL
ENSG00000186594	hsa-miR-133a-3p	ENSG00000087086	5.14986e-06	0.600217	CL
ENSG00000177410	hsa-miR-182-5p	ENSG00000182916	5.18186e-06	0.600081	CL
ENSG00000179840	hsa-let-7e-5p	ENSG00000117560	5.19021e-06	0.600045	CL
ENSG00000267106	hsa-miR-106a-5p	ENSG00000136634	5.22192e-06	0.599912	CL
ENSG00000176124	hsa-miR-124-3p	ENSG00000196419	5.25481e-06	0.599774	CL
ENSG00000175061	hsa-miR-223-3p	ENSG00000166347	5.30022e-06	0.599585	CL
ENSG00000205704	hsa-miR-150-5p	ENSG00000277363	5.34072e-06	0.599417	CL
ENSG00000243701	hsa-miR-19a-3p	ENSG00000136634	5.35747e-06	0.599349	CL
ENSG00000204282	hsa-miR-129-5p	ENSG00000114770	5.40412e-06	0.599158	CL
ENSG00000236939	hsa-miR-185-5p	ENSG00000067560	5.42296e-06	0.599081	CL
ENSG00000177640	hsa-miR-155-5p	ENSG00000109790	5.42356e-06	0.599079	CL
ENSG00000267454	hsa-miR-497-5p	ENSG00000151247	5.45372e-06	0.598957	CL
ENSG00000218510	hsa-miR-199a-5p	ENSG00000116885	5.52733e-06	0.598661	CL
ENSG00000174365	hsa-miR-128-3p	ENSG00000131981	5.60249e-06	0.598363	CL
ENSG00000088340	hsa-miR-34c-5p	ENSG00000131015	5.61264e-06	0.598323	CL
ENSG00000088340	hsa-miR-34a-5p	ENSG00000131015	5.61264e-06	0.598323	CL
ENSG00000171101	hsa-miR-199a-5p	ENSG00000204103	5.6532e-06	0.598164	CL
ENSG00000226051	hsa-miR-206	ENSG00000108691	5.65792e-06	0.598146	CL
ENSG00000226051	hsa-miR-1-3p	ENSG00000108691	5.65792e-06	0.598146	CL
ENSG00000231419	hsa-miR-203a-3p	ENSG00000105880	5.69108e-06	0.598017	CL
ENSG00000267339	hsa-miR-214-3p	ENSG00000164050	5.73016e-06	0.597866	CL
ENSG00000279355	hsa-miR-23a-3p	ENSG00000165699	5.73185e-06	0.597859	CL
ENSG00000230006	hsa-miR-223-3p	ENSG00000082397	5.77331e-06	0.5977	CL
ENSG00000225470	hsa-miR-155-5p	ENSG00000111711	5.79208e-06	0.597628	CL
ENSG00000260032	hsa-miR-155-5p	ENSG00000010818	5.7926e-06	0.597626	CL
ENSG00000245060	hsa-miR-224-5p	ENSG00000172465	5.79461e-06	0.597618	CL
ENSG00000245060	hsa-miR-370-3p	ENSG00000172465	5.79461e-06	0.597618	CL
ENSG00000245060	hsa-miR-221-3p	ENSG00000172465	5.79461e-06	0.597618	CL
ENSG00000245060	hsa-miR-504-5p	ENSG00000172465	5.79461e-06	0.597618	CL
ENSG00000225470	hsa-miR-181b-5p	ENSG00000127314	5.79568e-06	0.597614	CL
ENSG00000225470	hsa-miR-181d-5p	ENSG00000127314	5.79568e-06	0.597614	CL
ENSG00000230844	hsa-miR-23b-3p	ENSG00000145782	5.82212e-06	0.597514	CL
ENSG00000214106	hsa-miR-21-5p	ENSG00000116641	5.84741e-06	0.597418	CL
ENSG00000235958	hsa-miR-30c-5p	ENSG00000182979	5.89621e-06	0.597234	CL
ENSG00000234883	hsa-miR-19a-3p	ENSG00000006327	5.9211e-06	0.59714	CL
ENSG00000174365	hsa-miR-199a-5p	ENSG00000121900	5.98027e-06	0.59692	CL
ENSG00000214106	hsa-miR-31-5p	ENSG00000090339	6.00201e-06	0.596839	CL
ENSG00000214106	hsa-miR-146a-5p	ENSG00000090339	6.00201e-06	0.596839	CL
ENSG00000214106	hsa-miR-21-5p	ENSG00000090339	6.00201e-06	0.596839	CL
ENSG00000177640	hsa-miR-21-5p	ENSG00000120885	6.0956e-06	0.596496	CL
ENSG00000177640	hsa-miR-17-5p	ENSG00000120885	6.0956e-06	0.596496	CL
ENSG00000206337	hsa-miR-155-5p	ENSG00000129226	6.20758e-06	0.596091	CL
ENSG00000227392	hsa-miR-133a-3p	ENSG00000099822	6.2119e-06	0.596076	CL
ENSG00000227392	hsa-miR-133b	ENSG00000099822	6.2119e-06	0.596076	CL
ENSG00000260032	hsa-miR-222-3p	ENSG00000117713	6.24021e-06	0.595975	CL
ENSG00000227372	hsa-miR-346	ENSG00000172638	6.27173e-06	0.595863	CL
ENSG00000272168	hsa-miR-128-3p	ENSG00000077279	6.34071e-06	0.595619	CL
ENSG00000220575	hsa-miR-374a-5p	ENSG00000156076	6.39753e-06	0.59542	CL
ENSG00000249464	hsa-miR-30d-5p	ENSG00000057663	6.577e-06	0.594803	CL
ENSG00000249464	hsa-miR-34a-5p	ENSG00000057663	6.577e-06	0.594803	CL
ENSG00000249464	hsa-miR-30e-5p	ENSG00000057663	6.577e-06	0.594803	CL
ENSG00000186594	hsa-miR-181a-5p	ENSG00000102265	6.59902e-06	0.594729	CL
ENSG00000186594	hsa-miR-377-3p	ENSG00000102265	6.59902e-06	0.594729	CL
ENSG00000245060	hsa-miR-133a-3p	ENSG00000087086	6.68664e-06	0.594434	CL
ENSG00000228784	hsa-miR-29a-3p	ENSG00000130508	6.69526e-06	0.594405	CL
ENSG00000247982	hsa-miR-338-3p	ENSG00000102125	6.6999e-06	0.594389	CL
ENSG00000249464	hsa-miR-206	ENSG00000182718	6.70009e-06	0.594389	CL
ENSG00000249464	hsa-miR-1-3p	ENSG00000182718	6.70009e-06	0.594389	CL
ENSG00000177112	hsa-miR-122-5p	ENSG00000115008	6.72925e-06	0.594292	CL
ENSG00000215424	hsa-miR-23a-3p	ENSG00000165699	6.74119e-06	0.594252	CL
ENSG00000186594	hsa-miR-203a-3p	ENSG00000184557	6.74574e-06	0.594237	CL
ENSG00000100181	hsa-miR-106b-5p	ENSG00000101665	6.76646e-06	0.594168	CL
ENSG00000100181	hsa-miR-216a-5p	ENSG00000101665	6.76646e-06	0.594168	CL
ENSG00000100181	hsa-miR-185-5p	ENSG00000101665	6.76646e-06	0.594168	CL
ENSG00000100181	hsa-miR-93-5p	ENSG00000101665	6.76646e-06	0.594168	CL
ENSG00000212694	hsa-miR-129-5p	ENSG00000114770	6.78401e-06	0.59411	CL
ENSG00000236824	hsa-miR-107	ENSG00000100604	6.79106e-06	0.594087	CL
ENSG00000214353	hsa-miR-218-5p	ENSG00000141232	6.82688e-06	0.593969	CL
ENSG00000265688	hsa-miR-24-3p	ENSG00000173465	6.86256e-06	0.593852	CL
ENSG00000255737	hsa-miR-195-5p	ENSG00000135446	6.86646e-06	0.59384	CL
ENSG00000255737	hsa-miR-539-5p	ENSG00000135446	6.86646e-06	0.59384	CL
ENSG00000255737	hsa-miR-497-5p	ENSG00000135446	6.86646e-06	0.59384	CL
ENSG00000203808	hsa-miR-200c-3p	ENSG00000067606	7.04882e-06	0.593252	CL
ENSG00000175061	hsa-miR-218-5p	ENSG00000113048	7.07118e-06	0.593181	CL
ENSG00000272767	hsa-miR-30b-5p	ENSG00000126778	7.08351e-06	0.593142	CL
ENSG00000088340	hsa-miR-106a-5p	ENSG00000149948	7.17077e-06	0.592867	CL
ENSG00000088340	hsa-let-7e-5p	ENSG00000149948	7.17077e-06	0.592867	CL
ENSG00000088340	hsa-miR-154-5p	ENSG00000149948	7.17077e-06	0.592867	CL
ENSG00000088340	hsa-miR-107	ENSG00000149948	7.17077e-06	0.592867	CL
ENSG00000088340	hsa-miR-196a-5p	ENSG00000149948	7.17077e-06	0.592867	CL
ENSG00000256073	hsa-miR-181a-5p	ENSG00000245848	7.18391e-06	0.592825	CL
ENSG00000156273	hsa-miR-24-3p	ENSG00000157227	7.25582e-06	0.592601	CL
ENSG00000156273	hsa-miR-133a-3p	ENSG00000157227	7.25582e-06	0.592601	CL
ENSG00000214106	hsa-miR-27a-3p	ENSG00000188641	7.45251e-06	0.591999	CL
ENSG00000214106	hsa-miR-27b-3p	ENSG00000188641	7.45251e-06	0.591999	CL
ENSG00000227487	hsa-miR-143-3p	ENSG00000157764	7.49767e-06	0.591863	CL
ENSG00000267080	hsa-miR-34a-5p	ENSG00000187531	7.51848e-06	0.5918	CL
ENSG00000230844	hsa-miR-221-3p	ENSG00000172465	7.53516e-06	0.59175	CL
ENSG00000230844	hsa-miR-222-3p	ENSG00000172465	7.53516e-06	0.59175	CL
ENSG00000214353	hsa-miR-145-5p	ENSG00000185499	7.68512e-06	0.591305	CL
ENSG00000237149	hsa-miR-22-3p	ENSG00000100097	7.74551e-06	0.591128	CL
ENSG00000177410	hsa-miR-138-5p	ENSG00000107262	7.7485e-06	0.59112	CL
ENSG00000223773	hsa-miR-326	ENSG00000010278	7.95198e-06	0.590533	CL
ENSG00000277147	hsa-miR-155-5p	ENSG00000112110	8.05315e-06	0.590246	CL
ENSG00000177112	hsa-miR-214-3p	ENSG00000213465	8.14323e-06	0.589994	CL
ENSG00000176124	hsa-miR-27a-3p	ENSG00000167085	8.18925e-06	0.589866	CL
ENSG00000176124	hsa-miR-27b-3p	ENSG00000167085	8.18925e-06	0.589866	CL
ENSG00000218510	hsa-miR-17-5p	ENSG00000239697	8.19704e-06	0.589845	CL
ENSG00000206337	hsa-miR-146a-5p	ENSG00000121594	8.22668e-06	0.589763	CL
ENSG00000267339	hsa-miR-139-5p	ENSG00000178764	8.23498e-06	0.58974	CL
ENSG00000267454	hsa-miR-21-5p	ENSG00000103266	8.28291e-06	0.589608	CL
ENSG00000218510	hsa-miR-221-3p	ENSG00000168374	8.28356e-06	0.589606	CL
ENSG00000247240	hsa-miR-429	ENSG00000162521	8.33731e-06	0.589459	CL
ENSG00000179840	hsa-miR-28-5p	ENSG00000017427	8.33858e-06	0.589456	CL
ENSG00000179840	hsa-let-7e-5p	ENSG00000017427	8.33858e-06	0.589456	CL
ENSG00000179840	hsa-miR-98-5p	ENSG00000017427	8.33858e-06	0.589456	CL
ENSG00000179840	hsa-let-7i-5p	ENSG00000017427	8.33858e-06	0.589456	CL
ENSG00000175061	hsa-miR-141-3p	ENSG00000151247	8.40163e-06	0.589284	CL
ENSG00000237125	hsa-miR-200a-3p	ENSG00000130675	8.45502e-06	0.58914	CL
ENSG00000280780	hsa-miR-130a-3p	ENSG00000184371	8.46155e-06	0.589123	CL
ENSG00000280780	hsa-miR-130b-3p	ENSG00000184371	8.46155e-06	0.589123	CL
ENSG00000278175	hsa-miR-21-5p	ENSG00000068903	8.47285e-06	0.589092	CL
ENSG00000228784	hsa-miR-199a-5p	ENSG00000178607	8.55157e-06	0.588882	CL
ENSG00000171101	hsa-miR-34a-5p	ENSG00000182578	8.56365e-06	0.588849	CL
ENSG00000179314	hsa-miR-375	ENSG00000075043	8.5815e-06	0.588802	CL
ENSG00000237984	hsa-miR-590-3p	ENSG00000169554	8.58402e-06	0.588795	CL
ENSG00000237984	hsa-miR-154-5p	ENSG00000169554	8.58402e-06	0.588795	CL
ENSG00000237984	hsa-miR-205-5p	ENSG00000169554	8.58402e-06	0.588795	CL
ENSG00000237984	hsa-miR-338-3p	ENSG00000169554	8.58402e-06	0.588795	CL
ENSG00000237984	hsa-miR-153-3p	ENSG00000169554	8.58402e-06	0.588795	CL
ENSG00000230006	hsa-miR-148b-3p	ENSG00000110148	8.59454e-06	0.588767	CL
ENSG00000230006	hsa-miR-148a-3p	ENSG00000110148	8.59454e-06	0.588767	CL
ENSG00000230006	hsa-miR-152-3p	ENSG00000110148	8.59454e-06	0.588767	CL
ENSG00000171101	hsa-miR-34a-5p	ENSG00000095970	8.60066e-06	0.588751	CL
ENSG00000204650	hsa-miR-150-5p	ENSG00000089041	8.61102e-06	0.588724	CL
ENSG00000204650	hsa-miR-186-5p	ENSG00000089041	8.61102e-06	0.588724	CL
ENSG00000277147	hsa-miR-155-5p	ENSG00000148229	8.63435e-06	0.588662	CL
ENSG00000277147	hsa-miR-155-5p	ENSG00000067560	8.6495e-06	0.588622	CL
ENSG00000277147	hsa-miR-340-5p	ENSG00000067560	8.6495e-06	0.588622	CL
ENSG00000223773	hsa-miR-224-5p	ENSG00000158793	8.74521e-06	0.588371	CL
ENSG00000245526	hsa-miR-18a-5p	ENSG00000081913	8.87324e-06	0.588039	CL
ENSG00000245526	hsa-miR-15a-5p	ENSG00000081913	8.87324e-06	0.588039	CL
ENSG00000245526	hsa-miR-190a-5p	ENSG00000081913	8.87324e-06	0.588039	CL
ENSG00000245526	hsa-miR-92a-3p	ENSG00000081913	8.87324e-06	0.588039	CL
ENSG00000245526	hsa-miR-200b-3p	ENSG00000081913	8.87324e-06	0.588039	CL
ENSG00000245526	hsa-miR-141-3p	ENSG00000081913	8.87324e-06	0.588039	CL
ENSG00000223773	hsa-miR-124-3p	ENSG00000177105	8.9225e-06	0.587913	CL
ENSG00000175061	hsa-miR-200a-3p	ENSG00000256060	9.10174e-06	0.587458	CL
ENSG00000175061	hsa-miR-141-3p	ENSG00000256060	9.10174e-06	0.587458	CL
ENSG00000175061	hsa-miR-217	ENSG00000256060	9.10174e-06	0.587458	CL
ENSG00000175061	hsa-miR-192-5p	ENSG00000256060	9.10174e-06	0.587458	CL
ENSG00000177640	hsa-miR-101-3p	ENSG00000132463	9.10908e-06	0.587439	CL
ENSG00000236333	hsa-miR-181b-5p	ENSG00000163032	9.12746e-06	0.587393	CL
ENSG00000235531	hsa-miR-200b-3p	ENSG00000099246	9.16089e-06	0.58731	CL
ENSG00000257702	hsa-miR-206	ENSG00000025434	9.17239e-06	0.587281	CL
ENSG00000177410	hsa-miR-135b-5p	ENSG00000109919	9.40625e-06	0.586704	CL
ENSG00000269293	hsa-miR-181a-5p	ENSG00000245848	9.54309e-06	0.586372	CL
ENSG00000177640	hsa-miR-27a-3p	ENSG00000151012	9.5445e-06	0.586369	CL
ENSG00000214353	hsa-miR-155-5p	ENSG00000103351	9.62028e-06	0.586187	CL
ENSG00000239523	hsa-miR-106a-5p	ENSG00000197548	9.703e-06	0.58599	CL
ENSG00000177112	hsa-miR-214-3p	ENSG00000101843	9.72705e-06	0.585933	CL
ENSG00000206337	hsa-miR-106b-5p	ENSG00000165168	9.79271e-06	0.585778	CL
ENSG00000267106	hsa-miR-485-5p	ENSG00000137312	9.86629e-06	0.585606	CL
ENSG00000260032	hsa-miR-203a-3p	ENSG00000124209	9.91984e-06	0.585481	CL
ENSG00000243701	hsa-miR-141-3p	ENSG00000151247	9.94311e-06	0.585427	CL
ENSG00000232774	hsa-miR-204-5p	ENSG00000124813	1.00627e-05	0.585152	CL
ENSG00000232774	hsa-miR-155-5p	ENSG00000124813	1.00627e-05	0.585152	CL
ENSG00000232774	hsa-miR-205-5p	ENSG00000124813	1.00627e-05	0.585152	CL
ENSG00000232774	hsa-miR-135a-5p	ENSG00000124813	1.00627e-05	0.585152	CL
ENSG00000232774	hsa-miR-433-3p	ENSG00000124813	1.00627e-05	0.585152	CL
ENSG00000232774	hsa-miR-103a-3p	ENSG00000124813	1.00627e-05	0.585152	CL
ENSG00000232774	hsa-miR-195-5p	ENSG00000124813	1.00627e-05	0.585152	CL
ENSG00000232774	hsa-miR-497-5p	ENSG00000124813	1.00627e-05	0.585152	CL
ENSG00000230006	hsa-miR-125a-3p	ENSG00000157168	1.00747e-05	0.585124	CL
ENSG00000214106	hsa-miR-146a-5p	ENSG00000165806	1.01171e-05	0.585027	CL
ENSG00000205885	hsa-miR-31-5p	ENSG00000150457	1.01192e-05	0.585023	CL
ENSG00000260339	hsa-miR-155-5p	ENSG00000155016	1.01196e-05	0.585022	CL
ENSG00000243701	hsa-miR-21-5p	ENSG00000164342	1.01497e-05	0.584953	CL
ENSG00000222041	hsa-miR-485-5p	ENSG00000155760	1.01845e-05	0.584874	CL
ENSG00000222041	hsa-miR-1-3p	ENSG00000155760	1.01845e-05	0.584874	CL
ENSG00000279685	hsa-miR-107	ENSG00000107295	1.01906e-05	0.58486	CL
ENSG00000245060	hsa-miR-221-3p	ENSG00000102879	1.0245e-05	0.584737	CL
ENSG00000226287	hsa-miR-140-5p	ENSG00000108960	1.0258e-05	0.584708	CL
ENSG00000260032	hsa-miR-203a-3p	ENSG00000153317	1.03102e-05	0.584591	CL
ENSG00000186594	hsa-miR-1-3p	ENSG00000198888	1.03462e-05	0.58451	CL
ENSG00000234420	hsa-miR-146a-5p	ENSG00000067900	1.03858e-05	0.584422	CL
ENSG00000214106	hsa-miR-214-3p	ENSG00000120217	1.05146e-05	0.584137	CL
ENSG00000214106	hsa-miR-708-5p	ENSG00000120217	1.05146e-05	0.584137	CL
ENSG00000179840	hsa-let-7c-5p	ENSG00000136634	1.05213e-05	0.584122	CL
ENSG00000179840	hsa-miR-98-5p	ENSG00000136634	1.05213e-05	0.584122	CL
ENSG00000235703	hsa-miR-23a-3p	ENSG00000165699	1.05265e-05	0.584111	CL
ENSG00000235703	hsa-miR-32-5p	ENSG00000165699	1.05265e-05	0.584111	CL
ENSG00000248049	hsa-miR-150-5p	ENSG00000173465	1.0547e-05	0.584066	CL
ENSG00000224687	hsa-miR-155-5p	ENSG00000120756	1.06074e-05	0.583933	CL
ENSG00000277147	hsa-miR-206	ENSG00000136518	1.07717e-05	0.583577	CL
ENSG00000260852	hsa-miR-23a-3p	ENSG00000165699	1.0849e-05	0.583412	CL
ENSG00000223773	hsa-miR-145-5p	ENSG00000175348	1.09736e-05	0.583146	CL
ENSG00000214106	hsa-miR-338-3p	ENSG00000117155	1.09807e-05	0.583131	CL
ENSG00000267454	hsa-miR-124-3p	ENSG00000126247	1.10892e-05	0.582903	CL
ENSG00000245067	hsa-miR-212-3p	ENSG00000112096	1.11238e-05	0.582831	CL
ENSG00000175061	hsa-miR-138-5p	ENSG00000187840	1.11588e-05	0.582758	CL
ENSG00000176124	hsa-miR-205-5p	ENSG00000167815	1.12147e-05	0.582641	CL
ENSG00000255693	hsa-miR-124-3p	ENSG00000117152	1.13567e-05	0.582349	CL
ENSG00000179314	hsa-miR-124-3p	ENSG00000125675	1.1414e-05	0.582232	CL
ENSG00000196951	hsa-miR-155-5p	ENSG00000171033	1.14501e-05	0.582158	CL
ENSG00000273032	hsa-miR-107	ENSG00000107295	1.14506e-05	0.582157	CL
ENSG00000248698	hsa-miR-27b-3p	ENSG00000079156	1.14511e-05	0.582156	CL
ENSG00000248698	hsa-miR-33a-5p	ENSG00000079156	1.14511e-05	0.582156	CL
ENSG00000178977	hsa-miR-106a-5p	ENSG00000136634	1.14712e-05	0.582115	CL
ENSG00000255198	hsa-miR-106a-5p	ENSG00000012061	1.15088e-05	0.582039	CL
ENSG00000248049	hsa-miR-15a-5p	ENSG00000175567	1.15298e-05	0.581996	CL
ENSG00000237372	hsa-miR-122-5p	ENSG00000154917	1.16237e-05	0.581807	CL
ENSG00000177410	hsa-miR-150-5p	ENSG00000173465	1.16239e-05	0.581807	CL
ENSG00000236333	hsa-miR-7-5p	ENSG00000149269	1.16518e-05	0.581751	CL
ENSG00000236333	hsa-miR-30c-5p	ENSG00000149269	1.16518e-05	0.581751	CL
ENSG00000267454	hsa-miR-23b-3p	ENSG00000145782	1.17649e-05	0.581526	CL
ENSG00000234420	hsa-miR-129-5p	ENSG00000148400	1.17737e-05	0.581508	CL
ENSG00000234420	hsa-miR-146a-5p	ENSG00000148400	1.17737e-05	0.581508	CL
ENSG00000218510	hsa-miR-22-3p	ENSG00000214114	1.17791e-05	0.581497	CL
ENSG00000218510	hsa-miR-130a-3p	ENSG00000150782	1.17969e-05	0.581462	CL
ENSG00000237984	hsa-miR-29a-3p	ENSG00000164604	1.19513e-05	0.581158	CL
ENSG00000177640	hsa-miR-18a-5p	ENSG00000124145	1.20087e-05	0.581046	CL
ENSG00000245060	hsa-miR-101-3p	ENSG00000214575	1.20896e-05	0.580889	CL
ENSG00000205885	hsa-miR-155-5p	ENSG00000156273	1.21866e-05	0.580702	CL
ENSG00000280798	hsa-miR-19a-3p	ENSG00000091513	1.22025e-05	0.580672	CL
ENSG00000277147	hsa-miR-1-3p	ENSG00000198805	1.23805e-05	0.580333	CL
ENSG00000225791	hsa-miR-375	ENSG00000108561	1.23835e-05	0.580327	CL
ENSG00000176124	hsa-miR-223-3p	ENSG00000143575	1.24944e-05	0.580118	CL
ENSG00000237984	hsa-miR-214-3p	ENSG00000107643	1.25018e-05	0.580104	CL
ENSG00000227372	hsa-miR-346	ENSG00000164362	1.25104e-05	0.580088	CL
ENSG00000227372	hsa-miR-512-5p	ENSG00000164362	1.25104e-05	0.580088	CL
ENSG00000267586	hsa-miR-155-5p	ENSG00000168918	1.26917e-05	0.57975	CL
ENSG00000232656	hsa-miR-197-3p	ENSG00000114383	1.26986e-05	0.579738	CL
ENSG00000255559	hsa-miR-20a-5p	ENSG00000232995	1.27033e-05	0.579729	CL
ENSG00000255559	hsa-miR-7-5p	ENSG00000232995	1.27033e-05	0.579729	CL
ENSG00000243701	hsa-miR-21-5p	ENSG00000163823	1.29677e-05	0.579245	CL
ENSG00000176840	hsa-miR-140-5p	ENSG00000102678	1.2994e-05	0.579197	CL
ENSG00000258867	hsa-miR-433-3p	ENSG00000078579	1.30095e-05	0.579169	CL
ENSG00000232063	hsa-miR-18a-5p	ENSG00000144852	1.30252e-05	0.579141	CL
ENSG00000226287	hsa-miR-7-5p	ENSG00000149269	1.30415e-05	0.579111	CL
ENSG00000178977	hsa-miR-106a-5p	ENSG00000012061	1.30981e-05	0.579009	CL
ENSG00000171101	hsa-miR-143-3p	ENSG00000137462	1.31969e-05	0.578832	CL
ENSG00000245526	hsa-miR-135b-5p	ENSG00000101871	1.32526e-05	0.578733	CL
ENSG00000245060	hsa-miR-124-3p	ENSG00000136238	1.32842e-05	0.578677	CL
ENSG00000245060	hsa-miR-101-3p	ENSG00000136238	1.32842e-05	0.578677	CL
ENSG00000245060	hsa-miR-146a-5p	ENSG00000136238	1.32842e-05	0.578677	CL
ENSG00000245060	hsa-miR-224-5p	ENSG00000136238	1.32842e-05	0.578677	CL
ENSG00000245060	hsa-miR-194-5p	ENSG00000136238	1.32842e-05	0.578677	CL
ENSG00000215424	hsa-miR-129-5p	ENSG00000126070	1.33855e-05	0.578498	CL
ENSG00000248698	hsa-miR-135b-5p	ENSG00000101871	1.34004e-05	0.578472	CL
ENSG00000218510	hsa-miR-106a-5p	ENSG00000085871	1.34251e-05	0.578428	CL
ENSG00000247271	hsa-miR-224-5p	ENSG00000158793	1.34444e-05	0.578395	CL
ENSG00000215067	hsa-miR-150-5p	ENSG00000141480	1.35077e-05	0.578284	CL
ENSG00000088340	hsa-miR-1-3p	ENSG00000095752	1.36421e-05	0.57805	CL
ENSG00000267106	hsa-miR-146a-5p	ENSG00000168040	1.37111e-05	0.577931	CL
ENSG00000248019	hsa-miR-873-5p	ENSG00000250506	1.37692e-05	0.577831	CL
ENSG00000223773	hsa-miR-429	ENSG00000134996	1.37879e-05	0.577799	CL
ENSG00000153187	hsa-miR-337-3p	ENSG00000101266	1.38097e-05	0.577762	CL
ENSG00000267454	hsa-miR-28-5p	ENSG00000107262	1.39497e-05	0.577523	CL
ENSG00000206337	hsa-miR-221-3p	ENSG00000102879	1.39545e-05	0.577515	CL
ENSG00000206337	hsa-miR-222-3p	ENSG00000102879	1.39545e-05	0.577515	CL
ENSG00000236824	hsa-miR-93-5p	ENSG00000114383	1.40567e-05	0.577342	CL
ENSG00000236824	hsa-miR-378a-5p	ENSG00000114383	1.40567e-05	0.577342	CL
ENSG00000218510	hsa-miR-199a-5p	ENSG00000121900	1.40713e-05	0.577318	CL
ENSG00000245526	hsa-miR-29b-3p	ENSG00000171885	1.41135e-05	0.577247	CL
ENSG00000176124	hsa-miR-21-5p	ENSG00000177889	1.41716e-05	0.57715	CL
ENSG00000184608	hsa-miR-204-5p	ENSG00000148053	1.41825e-05	0.577131	CL
ENSG00000204623	hsa-miR-30a-5p	ENSG00000167371	1.42916e-05	0.57695	CL
ENSG00000248019	hsa-miR-23a-3p	ENSG00000165699	1.4338e-05	0.576873	CL
ENSG00000248019	hsa-miR-32-5p	ENSG00000165699	1.4338e-05	0.576873	CL
ENSG00000225791	hsa-miR-181b-5p	ENSG00000114209	1.44294e-05	0.576723	CL
ENSG00000245573	hsa-miR-23b-3p	ENSG00000133818	1.4439e-05	0.576707	CL
ENSG00000205885	hsa-miR-31-5p	ENSG00000240654	1.44783e-05	0.576642	CL
ENSG00000229619	hsa-miR-15b-5p	ENSG00000185129	1.46465e-05	0.576368	CL
ENSG00000179840	hsa-miR-370-3p	ENSG00000107968	1.46719e-05	0.576327	CL
ENSG00000267454	hsa-miR-378a-3p	ENSG00000114383	1.46726e-05	0.576326	CL
ENSG00000204650	hsa-miR-130a-3p	ENSG00000139737	1.47284e-05	0.576236	CL
ENSG00000235989	hsa-miR-155-5p	ENSG00000130758	1.48196e-05	0.576089	CL
ENSG00000232850	hsa-miR-222-3p	ENSG00000007908	1.51176e-05	0.575616	CL
ENSG00000224687	hsa-miR-124-3p	ENSG00000185420	1.51492e-05	0.575566	CL
ENSG00000214106	hsa-miR-145-5p	ENSG00000125398	1.5155e-05	0.575557	CL
ENSG00000222041	hsa-miR-24-3p	ENSG00000205364	1.51591e-05	0.57555	CL
ENSG00000246582	hsa-miR-122-5p	ENSG00000122359	1.52497e-05	0.575408	CL
ENSG00000156273	hsa-miR-7-5p	ENSG00000162924	1.52934e-05	0.57534	CL
ENSG00000206344	hsa-miR-130b-3p	ENSG00000173531	1.53413e-05	0.575266	CL
ENSG00000206344	hsa-miR-181c-5p	ENSG00000173531	1.53413e-05	0.575266	CL
ENSG00000279873	hsa-miR-144-3p	ENSG00000198793	1.54497e-05	0.575098	CL
ENSG00000279873	hsa-miR-497-5p	ENSG00000198793	1.54497e-05	0.575098	CL
ENSG00000279873	hsa-miR-125a-5p	ENSG00000198793	1.54497e-05	0.575098	CL
ENSG00000279873	hsa-miR-16-5p	ENSG00000198793	1.54497e-05	0.575098	CL
ENSG00000256073	hsa-miR-155-5p	ENSG00000113048	1.54614e-05	0.57508	CL
ENSG00000180769	hsa-miR-206	ENSG00000152661	1.54684e-05	0.575069	CL
ENSG00000180769	hsa-miR-200a-3p	ENSG00000152661	1.54684e-05	0.575069	CL
ENSG00000180769	hsa-miR-1-3p	ENSG00000152661	1.54684e-05	0.575069	CL
ENSG00000180769	hsa-miR-186-5p	ENSG00000152661	1.54684e-05	0.575069	CL
ENSG00000260339	hsa-miR-155-5p	ENSG00000153944	1.5674e-05	0.574754	CL
ENSG00000174365	hsa-miR-224-5p	ENSG00000136238	1.57139e-05	0.574693	CL
ENSG00000177410	hsa-miR-138-5p	ENSG00000155366	1.57376e-05	0.574658	CL
ENSG00000203930	hsa-miR-193a-3p	ENSG00000041353	1.57419e-05	0.574651	CL
ENSG00000258867	hsa-miR-137	ENSG00000139278	1.57689e-05	0.57461	CL
ENSG00000270547	hsa-miR-155-5p	ENSG00000173391	1.57746e-05	0.574601	CL
ENSG00000245526	hsa-miR-33a-5p	ENSG00000079156	1.58103e-05	0.574547	CL
ENSG00000215424	hsa-miR-149-5p	ENSG00000177000	1.58338e-05	0.574512	CL
ENSG00000248049	hsa-miR-195-5p	ENSG00000137309	1.58766e-05	0.574447	CL
ENSG00000248049	hsa-miR-15a-5p	ENSG00000137309	1.58766e-05	0.574447	CL
ENSG00000248049	hsa-miR-185-5p	ENSG00000137309	1.58766e-05	0.574447	CL
ENSG00000248049	hsa-miR-16-5p	ENSG00000137309	1.58766e-05	0.574447	CL
ENSG00000272168	hsa-miR-155-5p	ENSG00000196268	1.59057e-05	0.574404	CL
ENSG00000232774	hsa-miR-144-3p	ENSG00000107968	1.59084e-05	0.5744	CL
ENSG00000177640	hsa-miR-204-5p	ENSG00000092820	1.62026e-05	0.573961	CL
ENSG00000273032	hsa-miR-34a-5p	ENSG00000006432	1.6426e-05	0.573634	CL
ENSG00000067992	hsa-miR-106a-5p	ENSG00000142867	1.65076e-05	0.573515	CL
ENSG00000277147	hsa-miR-145-5p	ENSG00000189043	1.65506e-05	0.573453	CL
ENSG00000260032	hsa-miR-144-3p	ENSG00000198793	1.66439e-05	0.573318	CL
ENSG00000260032	hsa-miR-496	ENSG00000198793	1.66439e-05	0.573318	CL
ENSG00000237372	hsa-miR-122-5p	ENSG00000115008	1.66489e-05	0.573311	CL
ENSG00000272168	hsa-miR-155-5p	ENSG00000171033	1.67585e-05	0.573153	CL
ENSG00000231290	hsa-miR-19b-3p	ENSG00000069399	1.68507e-05	0.573021	CL
ENSG00000223839	hsa-miR-29a-3p	ENSG00000137204	1.68932e-05	0.572961	CL
ENSG00000227487	hsa-miR-10b-5p	ENSG00000196498	1.70264e-05	0.572772	CL
ENSG00000227487	hsa-miR-10a-5p	ENSG00000196498	1.70264e-05	0.572772	CL
ENSG00000227487	hsa-miR-125b-5p	ENSG00000196498	1.70264e-05	0.572772	CL
ENSG00000177410	hsa-miR-138-5p	ENSG00000187840	1.70377e-05	0.572756	CL
ENSG00000249464	hsa-miR-145-5p	ENSG00000146386	1.70737e-05	0.572706	CL
ENSG00000235703	hsa-miR-873-5p	ENSG00000250506	1.71497e-05	0.572599	CL
ENSG00000216775	hsa-miR-200b-3p	ENSG00000169554	1.72073e-05	0.572518	CL
ENSG00000216775	hsa-miR-590-3p	ENSG00000169554	1.72073e-05	0.572518	CL
ENSG00000216775	hsa-miR-200c-3p	ENSG00000169554	1.72073e-05	0.572518	CL
ENSG00000216775	hsa-miR-429	ENSG00000169554	1.72073e-05	0.572518	CL
ENSG00000216775	hsa-miR-335-5p	ENSG00000169554	1.72073e-05	0.572518	CL
ENSG00000216775	hsa-miR-205-5p	ENSG00000169554	1.72073e-05	0.572518	CL
ENSG00000216775	hsa-miR-203a-3p	ENSG00000169554	1.72073e-05	0.572518	CL
ENSG00000234883	hsa-miR-203a-3p	ENSG00000184557	1.72382e-05	0.572475	CL
ENSG00000234883	hsa-miR-19a-3p	ENSG00000184557	1.72382e-05	0.572475	CL
ENSG00000234883	hsa-let-7f-5p	ENSG00000184557	1.72382e-05	0.572475	CL
ENSG00000235597	hsa-miR-26a-5p	ENSG00000102678	1.72634e-05	0.57244	CL
ENSG00000175061	hsa-miR-223-3p	ENSG00000117632	1.74405e-05	0.572194	CL
ENSG00000237737	hsa-miR-24-3p	ENSG00000006432	1.755e-05	0.572044	CL
ENSG00000214381	hsa-miR-758-3p	ENSG00000164342	1.75951e-05	0.571982	CL
ENSG00000214381	hsa-miR-21-5p	ENSG00000164342	1.75951e-05	0.571982	CL
ENSG00000225953	hsa-miR-26a-5p	ENSG00000120875	1.76305e-05	0.571934	CL
ENSG00000226950	hsa-miR-125a-5p	ENSG00000143575	1.76579e-05	0.571896	CL
ENSG00000204282	hsa-miR-214-3p	ENSG00000164050	1.77001e-05	0.571839	CL
ENSG00000234883	hsa-miR-155-5p	ENSG00000172216	1.78108e-05	0.571688	CL
ENSG00000234883	hsa-let-7c-5p	ENSG00000172216	1.78108e-05	0.571688	CL
ENSG00000177112	hsa-miR-346	ENSG00000010671	1.79384e-05	0.571516	CL
ENSG00000176124	hsa-miR-21-5p	ENSG00000171863	1.80319e-05	0.571391	CL
ENSG00000234390	hsa-miR-30a-5p	ENSG00000002586	1.80482e-05	0.571369	CL
ENSG00000230006	hsa-miR-19a-3p	ENSG00000012124	1.80694e-05	0.571341	CL
ENSG00000205885	hsa-miR-214-3p	ENSG00000077782	1.80982e-05	0.571302	CL
ENSG00000175061	hsa-miR-326	ENSG00000141101	1.81237e-05	0.571268	CL
ENSG00000175061	hsa-miR-192-5p	ENSG00000141101	1.81237e-05	0.571268	CL
ENSG00000227487	hsa-miR-125b-5p	ENSG00000169926	1.82323e-05	0.571124	CL
ENSG00000227487	hsa-miR-125a-5p	ENSG00000169926	1.82323e-05	0.571124	CL
ENSG00000260032	hsa-miR-155-5p	ENSG00000175216	1.82379e-05	0.571117	CL
ENSG00000263812	hsa-miR-143-3p	ENSG00000133477	1.82682e-05	0.571077	CL
ENSG00000214381	hsa-miR-488-3p	ENSG00000115138	1.84649e-05	0.570818	CL
ENSG00000267454	hsa-miR-181d-5p	ENSG00000174775	1.85827e-05	0.570664	CL
ENSG00000267454	hsa-miR-181a-5p	ENSG00000174775	1.85827e-05	0.570664	CL
ENSG00000205704	hsa-miR-150-5p	ENSG00000081052	1.86224e-05	0.570612	CL
ENSG00000152931	hsa-miR-21-5p	ENSG00000136003	1.86334e-05	0.570598	CL
ENSG00000277147	hsa-miR-27b-3p	ENSG00000256060	1.87026e-05	0.570508	CL
ENSG00000277147	hsa-miR-217	ENSG00000256060	1.87026e-05	0.570508	CL
ENSG00000214381	hsa-miR-149-5p	ENSG00000125384	1.87066e-05	0.570503	CL
ENSG00000257702	hsa-miR-107	ENSG00000030582	1.8741e-05	0.570459	CL
ENSG00000156273	hsa-miR-155-5p	ENSG00000068305	1.89259e-05	0.570221	CL
ENSG00000156273	hsa-miR-1-3p	ENSG00000068305	1.89259e-05	0.570221	CL
ENSG00000177640	hsa-miR-21-5p	ENSG00000164342	1.8955e-05	0.570184	CL
ENSG00000177640	hsa-miR-758-3p	ENSG00000164342	1.8955e-05	0.570184	CL
ENSG00000247240	hsa-miR-206	ENSG00000136518	1.89623e-05	0.570174	CL
ENSG00000206344	hsa-miR-125b-5p	ENSG00000187531	1.90664e-05	0.570042	CL
ENSG00000206344	hsa-miR-125a-5p	ENSG00000187531	1.90664e-05	0.570042	CL
ENSG00000204241	hsa-miR-138-5p	ENSG00000169554	1.91238e-05	0.569969	CL
ENSG00000204241	hsa-miR-335-5p	ENSG00000169554	1.91238e-05	0.569969	CL
ENSG00000234883	hsa-miR-155-5p	ENSG00000056736	1.91321e-05	0.569958	CL
ENSG00000174365	hsa-miR-34a-5p	ENSG00000119782	1.91473e-05	0.569939	CL
ENSG00000260032	hsa-miR-25-3p	ENSG00000009413	1.92182e-05	0.569849	CL
ENSG00000260032	hsa-miR-32-5p	ENSG00000009413	1.92182e-05	0.569849	CL
ENSG00000171101	hsa-miR-488-3p	ENSG00000115138	1.94777e-05	0.569524	CL
ENSG00000177112	hsa-miR-98-5p	ENSG00000137869	1.94911e-05	0.569507	CL
ENSG00000177112	hsa-miR-19b-3p	ENSG00000137869	1.94911e-05	0.569507	CL
ENSG00000177112	hsa-let-7f-5p	ENSG00000137869	1.94911e-05	0.569507	CL
ENSG00000214106	hsa-miR-9-5p	ENSG00000084093	1.95474e-05	0.569437	CL
ENSG00000214106	hsa-miR-21-5p	ENSG00000084093	1.95474e-05	0.569437	CL
ENSG00000232656	hsa-miR-145-5p	ENSG00000108984	1.96717e-05	0.569283	CL
ENSG00000177410	hsa-miR-138-5p	ENSG00000074266	1.97191e-05	0.569225	CL
ENSG00000236824	hsa-miR-23a-3p	ENSG00000115419	1.97735e-05	0.569158	CL
ENSG00000226051	hsa-miR-1-3p	ENSG00000117519	1.97736e-05	0.569158	CL
ENSG00000237310	hsa-miR-106a-5p	ENSG00000085871	1.98105e-05	0.569112	CL
ENSG00000174365	hsa-miR-24-3p	ENSG00000205364	1.993e-05	0.568966	CL
ENSG00000156273	hsa-miR-142-3p	ENSG00000145012	1.99308e-05	0.568965	CL
ENSG00000267454	hsa-miR-21-5p	ENSG00000111328	1.99475e-05	0.568945	CL
ENSG00000234883	hsa-let-7f-5p	ENSG00000137869	1.99485e-05	0.568944	CL
ENSG00000234883	hsa-miR-19b-3p	ENSG00000137869	1.99485e-05	0.568944	CL
ENSG00000234883	hsa-miR-98-5p	ENSG00000137869	1.99485e-05	0.568944	CL
ENSG00000206337	hsa-miR-125b-5p	ENSG00000182511	1.99997e-05	0.568881	CL
ENSG00000245060	hsa-miR-133a-3p	ENSG00000175567	2.0003e-05	0.568877	CL
ENSG00000177640	hsa-miR-155-5p	ENSG00000103351	2.01137e-05	0.568743	CL
ENSG00000279873	hsa-miR-125a-5p	ENSG00000106144	2.01941e-05	0.568646	CL
ENSG00000227372	hsa-miR-200b-3p	ENSG00000147065	2.02532e-05	0.568575	CL
ENSG00000227372	hsa-miR-200c-3p	ENSG00000147065	2.02532e-05	0.568575	CL
ENSG00000222041	hsa-miR-320a	ENSG00000136238	2.02632e-05	0.568563	CL
ENSG00000245060	hsa-miR-124-3p	ENSG00000126247	2.05212e-05	0.568254	CL
ENSG00000280780	hsa-miR-17-5p	ENSG00000120885	2.06894e-05	0.568055	CL
ENSG00000222041	hsa-miR-125a-3p	ENSG00000136244	2.07742e-05	0.567955	CL
ENSG00000222041	hsa-miR-149-5p	ENSG00000136244	2.07742e-05	0.567955	CL
ENSG00000222041	hsa-miR-136-5p	ENSG00000136244	2.07742e-05	0.567955	CL
ENSG00000186594	hsa-miR-613	ENSG00000025434	2.08668e-05	0.567847	CL
ENSG00000186594	hsa-miR-206	ENSG00000025434	2.08668e-05	0.567847	CL
ENSG00000177640	hsa-miR-31-5p	ENSG00000137710	2.09332e-05	0.567769	CL
ENSG00000277147	hsa-miR-155-5p	ENSG00000172086	2.10111e-05	0.567679	CL
ENSG00000260032	hsa-miR-155-5p	ENSG00000082269	2.10164e-05	0.567672	CL
ENSG00000248698	hsa-miR-29a-3p	ENSG00000113742	2.11174e-05	0.567555	CL
ENSG00000232656	hsa-miR-300	ENSG00000168283	2.12154e-05	0.567442	CL
ENSG00000232656	hsa-miR-494-3p	ENSG00000168283	2.12154e-05	0.567442	CL
ENSG00000232656	hsa-miR-708-5p	ENSG00000168283	2.12154e-05	0.567442	CL
ENSG00000235597	hsa-miR-34c-5p	ENSG00000186868	2.12932e-05	0.567353	CL
ENSG00000204650	hsa-miR-329-3p	ENSG00000004487	2.1442e-05	0.567182	CL
ENSG00000228794	hsa-miR-103a-3p	ENSG00000107404	2.14953e-05	0.567122	CL
ENSG00000152931	hsa-miR-27a-3p	ENSG00000065559	2.15206e-05	0.567093	CL
ENSG00000245526	hsa-miR-21-5p	ENSG00000172575	2.1548e-05	0.567062	CL
ENSG00000220575	hsa-miR-376a-3p	ENSG00000152595	2.16405e-05	0.566957	CL
ENSG00000245526	hsa-miR-34c-5p	ENSG00000186868	2.16678e-05	0.566926	CL
ENSG00000279685	hsa-miR-214-3p	ENSG00000164050	2.17256e-05	0.566861	CL
ENSG00000232021	hsa-miR-149-5p	ENSG00000172936	2.17934e-05	0.566784	CL
ENSG00000243701	hsa-miR-129-5p	ENSG00000184182	2.1823e-05	0.566751	CL
ENSG00000243701	hsa-miR-335-5p	ENSG00000184182	2.1823e-05	0.566751	CL
ENSG00000245573	hsa-miR-224-5p	ENSG00000136238	2.18318e-05	0.566741	CL
ENSG00000245573	hsa-miR-142-3p	ENSG00000136238	2.18318e-05	0.566741	CL
ENSG00000245573	hsa-miR-101-3p	ENSG00000136238	2.18318e-05	0.566741	CL
ENSG00000131797	hsa-miR-129-5p	ENSG00000126070	2.18874e-05	0.566679	CL
ENSG00000236939	hsa-miR-222-3p	ENSG00000134970	2.19178e-05	0.566645	CL
ENSG00000236939	hsa-miR-221-3p	ENSG00000134970	2.19178e-05	0.566645	CL
ENSG00000280798	hsa-miR-107	ENSG00000171132	2.19912e-05	0.566563	CL
ENSG00000228784	hsa-miR-29a-3p	ENSG00000123500	2.20048e-05	0.566548	CL
ENSG00000226287	hsa-miR-375	ENSG00000102882	2.20684e-05	0.566477	CL
ENSG00000214106	hsa-miR-21-5p	ENSG00000124831	2.22907e-05	0.566231	CL
ENSG00000230006	hsa-miR-15b-5p	ENSG00000136535	2.23334e-05	0.566184	CL
ENSG00000206337	hsa-miR-155-5p	ENSG00000101347	2.23351e-05	0.566182	CL
ENSG00000206337	hsa-miR-181a-5p	ENSG00000101347	2.23351e-05	0.566182	CL
ENSG00000230844	hsa-miR-23a-3p	ENSG00000198830	2.23582e-05	0.566157	CL
ENSG00000241769	hsa-miR-141-3p	ENSG00000102125	2.24674e-05	0.566037	CL
ENSG00000230006	hsa-miR-100-5p	ENSG00000122254	2.25387e-05	0.56596	CL
ENSG00000267454	hsa-miR-124-3p	ENSG00000177105	2.25438e-05	0.565954	CL
ENSG00000258708	hsa-miR-133b	ENSG00000117569	2.26173e-05	0.565874	CL
ENSG00000258708	hsa-miR-223-3p	ENSG00000117569	2.26173e-05	0.565874	CL
ENSG00000179314	hsa-miR-27a-3p	ENSG00000105866	2.26815e-05	0.565804	CL
ENSG00000267064	hsa-miR-155-5p	ENSG00000144746	2.30038e-05	0.565458	CL
ENSG00000235823	hsa-let-7b-5p	ENSG00000214575	2.30737e-05	0.565383	CL
ENSG00000248698	hsa-miR-10a-5p	ENSG00000105698	2.3116e-05	0.565338	CL
ENSG00000267106	hsa-miR-20b-5p	ENSG00000132170	2.31547e-05	0.565297	CL
ENSG00000267106	hsa-miR-20a-5p	ENSG00000132170	2.31547e-05	0.565297	CL
ENSG00000177410	hsa-miR-497-5p	ENSG00000151247	2.32013e-05	0.565247	CL
ENSG00000241560	hsa-miR-135b-5p	ENSG00000186340	2.33949e-05	0.565042	CL
ENSG00000241560	hsa-miR-27b-3p	ENSG00000186340	2.33949e-05	0.565042	CL
ENSG00000206337	hsa-miR-18a-5p	ENSG00000072694	2.34156e-05	0.565021	CL
ENSG00000152931	hsa-miR-221-3p	ENSG00000149269	2.3422e-05	0.565014	CL
ENSG00000152931	hsa-miR-30c-5p	ENSG00000149269	2.3422e-05	0.565014	CL
ENSG00000179840	hsa-let-7a-5p	ENSG00000111424	2.35238e-05	0.564907	CL
ENSG00000177640	hsa-miR-155-5p	ENSG00000168918	2.35754e-05	0.564853	CL
ENSG00000226746	hsa-miR-24-3p	ENSG00000050820	2.37805e-05	0.564639	CL
ENSG00000248698	hsa-miR-128-3p	ENSG00000140538	2.39077e-05	0.564508	CL
ENSG00000214106	hsa-miR-146a-5p	ENSG00000109320	2.4074e-05	0.564337	CL
ENSG00000214106	hsa-miR-9-5p	ENSG00000109320	2.4074e-05	0.564337	CL
ENSG00000214106	hsa-miR-146b-5p	ENSG00000109320	2.4074e-05	0.564337	CL
ENSG00000204650	hsa-miR-26a-5p	ENSG00000102678	2.43076e-05	0.564098	CL
ENSG00000273032	hsa-miR-30a-5p	ENSG00000149294	2.43178e-05	0.564088	CL
ENSG00000223773	hsa-miR-17-5p	ENSG00000239697	2.4345e-05	0.56406	CL
ENSG00000186594	hsa-miR-106a-5p	ENSG00000136634	2.43752e-05	0.56403	CL
ENSG00000278175	hsa-miR-27b-3p	ENSG00000168958	2.44042e-05	0.564	CL
ENSG00000225470	hsa-miR-155-5p	ENSG00000172086	2.45121e-05	0.563891	CL
ENSG00000243701	hsa-miR-340-5p	ENSG00000067560	2.45852e-05	0.563817	CL
ENSG00000243701	hsa-miR-101-3p	ENSG00000067560	2.45852e-05	0.563817	CL
ENSG00000243701	hsa-miR-101-3p	ENSG00000132463	2.45876e-05	0.563815	CL
ENSG00000245060	hsa-miR-218-5p	ENSG00000113048	2.48861e-05	0.563517	CL
ENSG00000204623	hsa-miR-130b-3p	ENSG00000173531	2.48969e-05	0.563506	CL
ENSG00000247271	hsa-miR-181a-5p	ENSG00000245848	2.52016e-05	0.563204	CL
ENSG00000230006	hsa-miR-103a-3p	ENSG00000173267	2.5367e-05	0.563042	CL
ENSG00000230006	hsa-miR-107	ENSG00000173267	2.5367e-05	0.563042	CL
ENSG00000215424	hsa-miR-204-5p	ENSG00000161202	2.53763e-05	0.563033	CL
ENSG00000218510	hsa-miR-16-5p	ENSG00000213465	2.54393e-05	0.562972	CL
ENSG00000218510	hsa-miR-195-5p	ENSG00000213465	2.54393e-05	0.562972	CL
ENSG00000218510	hsa-miR-214-3p	ENSG00000213465	2.54393e-05	0.562972	CL
ENSG00000171101	hsa-miR-199a-5p	ENSG00000130203	2.55242e-05	0.562889	CL
ENSG00000214106	hsa-miR-27a-3p	ENSG00000116044	2.56129e-05	0.562803	CL
ENSG00000215424	hsa-miR-155-5p	ENSG00000187742	2.56533e-05	0.562764	CL
ENSG00000204282	hsa-miR-145-5p	ENSG00000124920	2.5693e-05	0.562725	CL
ENSG00000227487	hsa-miR-125a-5p	ENSG00000068024	2.56997e-05	0.562719	CL
ENSG00000248698	hsa-miR-29a-3p	ENSG00000172575	2.57284e-05	0.562691	CL
ENSG00000152931	hsa-miR-21-5p	ENSG00000163536	2.58421e-05	0.562582	CL
ENSG00000088340	hsa-miR-1-3p	ENSG00000137193	2.59146e-05	0.562512	CL
ENSG00000171101	hsa-miR-199a-5p	ENSG00000109861	2.59546e-05	0.562474	CL
ENSG00000223773	hsa-miR-214-3p	ENSG00000271503	2.59862e-05	0.562444	CL
ENSG00000176124	hsa-miR-185-5p	ENSG00000070831	2.60613e-05	0.562372	CL
ENSG00000176124	hsa-miR-133b	ENSG00000070831	2.60613e-05	0.562372	CL
ENSG00000176124	hsa-miR-204-5p	ENSG00000070831	2.60613e-05	0.562372	CL
ENSG00000176124	hsa-miR-133a-3p	ENSG00000070831	2.60613e-05	0.562372	CL
ENSG00000176124	hsa-miR-195-5p	ENSG00000070831	2.60613e-05	0.562372	CL
ENSG00000176124	hsa-miR-107	ENSG00000070831	2.60613e-05	0.562372	CL
ENSG00000226137	hsa-miR-373-3p	ENSG00000198793	2.60879e-05	0.562347	CL
ENSG00000226137	hsa-miR-520c-3p	ENSG00000198793	2.60879e-05	0.562347	CL
ENSG00000223773	hsa-miR-19a-3p	ENSG00000137462	2.61316e-05	0.562305	CL
ENSG00000223773	hsa-miR-19b-3p	ENSG00000137462	2.61316e-05	0.562305	CL
ENSG00000223773	hsa-miR-154-5p	ENSG00000137462	2.61316e-05	0.562305	CL
ENSG00000206337	hsa-miR-29a-3p	ENSG00000170542	2.61743e-05	0.562265	CL
ENSG00000206337	hsa-miR-127-3p	ENSG00000170542	2.61743e-05	0.562265	CL
ENSG00000206337	hsa-miR-155-5p	ENSG00000136404	2.64768e-05	0.561979	CL
ENSG00000131797	hsa-miR-129-5p	ENSG00000114770	2.65224e-05	0.561936	CL
ENSG00000156273	hsa-miR-93-5p	ENSG00000165029	2.66005e-05	0.561863	CL
ENSG00000156273	hsa-miR-613	ENSG00000165029	2.66005e-05	0.561863	CL
ENSG00000156273	hsa-miR-17-5p	ENSG00000165029	2.66005e-05	0.561863	CL
ENSG00000156273	hsa-miR-33b-5p	ENSG00000165029	2.66005e-05	0.561863	CL
ENSG00000156273	hsa-miR-302a-3p	ENSG00000165029	2.66005e-05	0.561863	CL
ENSG00000234616	hsa-miR-106a-5p	ENSG00000110092	2.69294e-05	0.561557	CL
ENSG00000277147	hsa-miR-155-5p	ENSG00000113048	2.69358e-05	0.561551	CL
ENSG00000176124	hsa-miR-133a-3p	ENSG00000126261	2.71596e-05	0.561345	CL
ENSG00000233930	hsa-miR-155-5p	ENSG00000007908	2.71722e-05	0.561333	CL
ENSG00000223573	hsa-miR-31-5p	ENSG00000171132	2.73644e-05	0.561157	CL
ENSG00000186594	hsa-miR-106a-5p	ENSG00000026103	2.73875e-05	0.561136	CL
ENSG00000186594	hsa-miR-23a-3p	ENSG00000026103	2.73875e-05	0.561136	CL
ENSG00000186594	hsa-miR-133b	ENSG00000026103	2.73875e-05	0.561136	CL
ENSG00000171101	hsa-miR-185-5p	ENSG00000105329	2.73893e-05	0.561135	CL
ENSG00000214106	hsa-miR-93-5p	ENSG00000174282	2.74978e-05	0.561036	CL
ENSG00000240990	hsa-miR-19a-3p	ENSG00000106004	2.76427e-05	0.560905	CL
ENSG00000237737	hsa-miR-92a-3p	ENSG00000109670	2.76684e-05	0.560881	CL
ENSG00000237737	hsa-miR-363-3p	ENSG00000109670	2.76684e-05	0.560881	CL
ENSG00000237737	hsa-miR-25-3p	ENSG00000109670	2.76684e-05	0.560881	CL
ENSG00000237737	hsa-miR-24-3p	ENSG00000109670	2.76684e-05	0.560881	CL
ENSG00000237737	hsa-miR-32-5p	ENSG00000109670	2.76684e-05	0.560881	CL
ENSG00000237737	hsa-miR-367-3p	ENSG00000109670	2.76684e-05	0.560881	CL
ENSG00000247271	hsa-let-7e-5p	ENSG00000117400	2.78021e-05	0.560761	CL
ENSG00000231419	hsa-miR-122-5p	ENSG00000117020	2.7812e-05	0.560752	CL
ENSG00000234420	hsa-miR-211-5p	ENSG00000197081	2.78163e-05	0.560748	CL
ENSG00000260852	hsa-miR-145-5p	ENSG00000140443	2.79049e-05	0.560669	CL
ENSG00000260852	hsa-miR-138-5p	ENSG00000140443	2.79049e-05	0.560669	CL
ENSG00000260852	hsa-miR-143-3p	ENSG00000140443	2.79049e-05	0.560669	CL
ENSG00000260852	hsa-miR-185-5p	ENSG00000140443	2.79049e-05	0.560669	CL
ENSG00000230006	hsa-miR-376c-3p	ENSG00000123612	2.80463e-05	0.560543	CL
ENSG00000231177	hsa-miR-146a-5p	ENSG00000100065	2.81523e-05	0.560448	CL
ENSG00000243701	hsa-miR-19a-3p	ENSG00000196664	2.81632e-05	0.560439	CL
ENSG00000245017	hsa-miR-122-5p	ENSG00000180228	2.82092e-05	0.560398	CL
ENSG00000226051	hsa-miR-1-3p	ENSG00000205542	2.82534e-05	0.560359	CL
ENSG00000234741	hsa-miR-21-5p	ENSG00000136986	2.82707e-05	0.560343	CL
ENSG00000224975	hsa-miR-143-3p	ENSG00000119772	2.85668e-05	0.560083	CL
ENSG00000224975	hsa-miR-101-3p	ENSG00000119772	2.85668e-05	0.560083	CL
ENSG00000224975	hsa-miR-194-5p	ENSG00000119772	2.85668e-05	0.560083	CL
ENSG00000214353	hsa-miR-196a-5p	ENSG00000135046	2.90762e-05	0.55964	CL
ENSG00000249464	hsa-miR-30d-5p	ENSG00000169756	2.93995e-05	0.559363	CL
ENSG00000225470	hsa-miR-155-5p	ENSG00000111229	2.95094e-05	0.559269	CL
ENSG00000279685	hsa-miR-137	ENSG00000058335	2.95546e-05	0.559231	CL
ENSG00000239265	hsa-miR-221-3p	ENSG00000135046	2.9656e-05	0.559145	CL
ENSG00000251359	hsa-miR-26a-5p	ENSG00000163932	2.96714e-05	0.559132	CL
ENSG00000243701	hsa-miR-19a-3p	ENSG00000012779	2.98558e-05	0.558976	CL
ENSG00000267454	hsa-miR-205-5p	ENSG00000167815	2.99816e-05	0.55887	CL
ENSG00000156273	hsa-miR-155-5p	ENSG00000176853	3.02382e-05	0.558656	CL
ENSG00000269293	hsa-miR-218-5p	ENSG00000147155	3.03711e-05	0.558546	CL
ENSG00000230844	hsa-miR-23b-3p	ENSG00000165672	3.046e-05	0.558472	CL
ENSG00000216775	hsa-miR-203a-3p	ENSG00000170836	3.04935e-05	0.558444	CL
ENSG00000247240	hsa-miR-200c-3p	ENSG00000067560	3.08023e-05	0.558191	CL
ENSG00000247240	hsa-miR-146a-5p	ENSG00000067560	3.08023e-05	0.558191	CL
ENSG00000214106	hsa-miR-335-5p	ENSG00000155816	3.0913e-05	0.5581	CL
ENSG00000111850	hsa-miR-214-3p	ENSG00000101843	3.10123e-05	0.55802	CL
ENSG00000171101	hsa-miR-34a-5p	ENSG00000165168	3.13154e-05	0.557774	CL
ENSG00000225756	hsa-miR-128-3p	ENSG00000186350	3.15996e-05	0.557547	CL
ENSG00000175061	hsa-miR-506-3p	ENSG00000165060	3.16774e-05	0.557484	CL
ENSG00000223773	hsa-miR-29b-3p	ENSG00000008517	3.18191e-05	0.557372	CL
ENSG00000179406	hsa-miR-106a-5p	ENSG00000149311	3.20322e-05	0.557203	CL
ENSG00000214106	hsa-miR-378a-3p	ENSG00000026025	3.20523e-05	0.557187	CL
ENSG00000214106	hsa-miR-9-5p	ENSG00000026025	3.20523e-05	0.557187	CL
ENSG00000230006	hsa-miR-150-5p	ENSG00000122025	3.20846e-05	0.557162	CL
ENSG00000248019	hsa-miR-32-5p	ENSG00000158715	3.213e-05	0.557126	CL
ENSG00000247271	hsa-miR-224-5p	ENSG00000172465	3.21822e-05	0.557085	CL
ENSG00000206337	hsa-miR-155-5p	ENSG00000132465	3.23187e-05	0.556978	CL
ENSG00000179840	hsa-miR-24-3p	ENSG00000205364	3.2439e-05	0.556884	CL
ENSG00000206337	hsa-miR-106a-5p	ENSG00000085871	3.25712e-05	0.556781	CL
ENSG00000229619	hsa-miR-19a-3p	ENSG00000114166	3.26456e-05	0.556723	CL
ENSG00000229619	hsa-miR-19b-3p	ENSG00000114166	3.26456e-05	0.556723	CL
ENSG00000176124	hsa-miR-133a-3p	ENSG00000162704	3.27737e-05	0.556624	CL
ENSG00000176124	hsa-miR-31-5p	ENSG00000162704	3.27737e-05	0.556624	CL
ENSG00000260032	hsa-miR-155-5p	ENSG00000150760	3.30569e-05	0.556407	CL
ENSG00000236882	hsa-miR-24-3p	ENSG00000149596	3.33232e-05	0.556203	CL
ENSG00000272168	hsa-miR-155-5p	ENSG00000198105	3.33987e-05	0.556146	CL
ENSG00000230417	hsa-miR-130a-3p	ENSG00000150782	3.34514e-05	0.556106	CL
ENSG00000230844	hsa-miR-181b-5p	ENSG00000134970	3.35693e-05	0.556017	CL
ENSG00000230844	hsa-miR-222-3p	ENSG00000134970	3.35693e-05	0.556017	CL
ENSG00000230844	hsa-miR-221-3p	ENSG00000134970	3.35693e-05	0.556017	CL
ENSG00000230844	hsa-miR-451a	ENSG00000134970	3.35693e-05	0.556017	CL
ENSG00000226051	hsa-miR-203a-3p	ENSG00000172936	3.36131e-05	0.555984	CL
ENSG00000255571	hsa-miR-96-5p	ENSG00000082701	3.37219e-05	0.555902	CL
ENSG00000255571	hsa-miR-182-5p	ENSG00000082701	3.37219e-05	0.555902	CL
ENSG00000255571	hsa-miR-29b-3p	ENSG00000082701	3.37219e-05	0.555902	CL
ENSG00000215424	hsa-miR-26b-5p	ENSG00000177463	3.38743e-05	0.555787	CL
ENSG00000215424	hsa-miR-143-3p	ENSG00000177463	3.38743e-05	0.555787	CL
ENSG00000249464	hsa-miR-449a	ENSG00000116478	3.38955e-05	0.555771	CL
ENSG00000249464	hsa-miR-34a-5p	ENSG00000116478	3.38955e-05	0.555771	CL
ENSG00000249464	hsa-miR-449b-5p	ENSG00000116478	3.38955e-05	0.555771	CL
ENSG00000156273	hsa-miR-20b-5p	ENSG00000110422	3.39036e-05	0.555765	CL
ENSG00000156273	hsa-miR-106a-5p	ENSG00000110422	3.39036e-05	0.555765	CL
ENSG00000214381	hsa-miR-143-3p	ENSG00000131724	3.4132e-05	0.555595	CL
ENSG00000258867	hsa-miR-146b-5p	ENSG00000136869	3.44242e-05	0.555378	CL
ENSG00000258867	hsa-miR-146a-5p	ENSG00000136869	3.44242e-05	0.555378	CL
ENSG00000218510	hsa-miR-218-5p	ENSG00000113048	3.44411e-05	0.555366	CL
ENSG00000175061	hsa-miR-382-5p	ENSG00000065978	3.46556e-05	0.555208	CL
ENSG00000273032	hsa-miR-34c-5p	ENSG00000136928	3.48031e-05	0.5551	CL
ENSG00000186162	hsa-miR-29a-3p	ENSG00000132341	3.48082e-05	0.555096	CL
ENSG00000220575	hsa-miR-204-5p	ENSG00000141542	3.49311e-05	0.555006	CL
ENSG00000222041	hsa-miR-106a-5p	ENSG00000026103	3.50201e-05	0.554942	CL
ENSG00000222041	hsa-miR-320a	ENSG00000026103	3.50201e-05	0.554942	CL
ENSG00000204623	hsa-miR-221-3p	ENSG00000137504	3.5046e-05	0.554923	CL
ENSG00000243701	hsa-miR-335-5p	ENSG00000139687	3.50513e-05	0.554919	CL
ENSG00000243701	hsa-miR-26b-5p	ENSG00000139687	3.50513e-05	0.554919	CL
ENSG00000243701	hsa-miR-26a-5p	ENSG00000139687	3.50513e-05	0.554919	CL
ENSG00000156273	hsa-miR-215-5p	ENSG00000159216	3.51891e-05	0.554819	CL
ENSG00000156273	hsa-miR-101-3p	ENSG00000159216	3.51891e-05	0.554819	CL
ENSG00000156273	hsa-miR-106a-5p	ENSG00000159216	3.51891e-05	0.554819	CL
ENSG00000156273	hsa-miR-20a-5p	ENSG00000159216	3.51891e-05	0.554819	CL
ENSG00000156273	hsa-miR-17-5p	ENSG00000159216	3.51891e-05	0.554819	CL
ENSG00000248698	hsa-miR-320a	ENSG00000169083	3.53081e-05	0.554733	CL
ENSG00000067992	hsa-miR-106a-5p	ENSG00000059804	3.54375e-05	0.55464	CL
ENSG00000234883	hsa-miR-9-5p	ENSG00000163874	3.54578e-05	0.554625	CL
ENSG00000245573	hsa-miR-429	ENSG00000181449	3.5527e-05	0.554576	CL
ENSG00000245573	hsa-miR-340-5p	ENSG00000181449	3.5527e-05	0.554576	CL
ENSG00000245573	hsa-miR-625-5p	ENSG00000181449	3.5527e-05	0.554576	CL
ENSG00000245573	hsa-miR-140-5p	ENSG00000181449	3.5527e-05	0.554576	CL
ENSG00000245573	hsa-miR-145-5p	ENSG00000181449	3.5527e-05	0.554576	CL
ENSG00000245573	hsa-miR-371a-5p	ENSG00000181449	3.5527e-05	0.554576	CL
ENSG00000179314	hsa-miR-302b-3p	ENSG00000118971	3.55316e-05	0.554572	CL
ENSG00000179314	hsa-miR-16-5p	ENSG00000118971	3.55316e-05	0.554572	CL
ENSG00000179314	hsa-miR-124-3p	ENSG00000118971	3.55316e-05	0.554572	CL
ENSG00000179314	hsa-miR-302d-3p	ENSG00000118971	3.55316e-05	0.554572	CL
ENSG00000179314	hsa-miR-191-5p	ENSG00000118971	3.55316e-05	0.554572	CL
ENSG00000279873	hsa-miR-143-3p	ENSG00000157764	3.59821e-05	0.554251	CL
ENSG00000214106	hsa-miR-31-5p	ENSG00000069974	3.60005e-05	0.554238	CL
ENSG00000279685	hsa-miR-1-3p	ENSG00000099822	3.61151e-05	0.554157	CL
ENSG00000267454	hsa-miR-378a-3p	ENSG00000135925	3.61189e-05	0.554154	CL
ENSG00000176840	hsa-miR-204-5p	ENSG00000141542	3.6196e-05	0.5541	CL
ENSG00000237037	hsa-miR-15b-5p	ENSG00000170873	3.61992e-05	0.554098	CL
ENSG00000214381	hsa-miR-125b-5p	ENSG00000182511	3.63356e-05	0.554002	CL
ENSG00000177112	hsa-miR-122-5p	ENSG00000165775	3.63824e-05	0.553969	CL
ENSG00000223839	hsa-miR-346	ENSG00000164362	3.63902e-05	0.553963	CL
ENSG00000223839	hsa-miR-138-5p	ENSG00000164362	3.63902e-05	0.553963	CL
ENSG00000281357	hsa-miR-142-3p	ENSG00000115008	3.67333e-05	0.553724	CL
ENSG00000260032	hsa-miR-154-5p	ENSG00000100697	3.70247e-05	0.553522	CL
ENSG00000260032	hsa-miR-222-3p	ENSG00000100697	3.70247e-05	0.553522	CL
ENSG00000260032	hsa-miR-18a-5p	ENSG00000100697	3.70247e-05	0.553522	CL
ENSG00000260032	hsa-miR-221-3p	ENSG00000100697	3.70247e-05	0.553522	CL
ENSG00000260339	hsa-miR-155-5p	ENSG00000120756	3.7387e-05	0.553273	CL
ENSG00000255571	hsa-miR-144-3p	ENSG00000001626	3.75783e-05	0.553142	CL
ENSG00000236333	hsa-miR-27a-3p	ENSG00000065559	3.76967e-05	0.553062	CL
ENSG00000218510	hsa-miR-218-5p	ENSG00000147155	3.7728e-05	0.55304	CL
ENSG00000278175	hsa-miR-18a-5p	ENSG00000028839	3.77448e-05	0.553029	CL
ENSG00000248698	hsa-miR-27a-3p	ENSG00000130821	3.77903e-05	0.552998	CL
ENSG00000274956	hsa-miR-199b-5p	ENSG00000157404	3.81418e-05	0.552761	CL
ENSG00000206337	hsa-miR-125b-5p	ENSG00000160712	3.83795e-05	0.552602	CL
ENSG00000206337	hsa-miR-124-3p	ENSG00000160712	3.83795e-05	0.552602	CL
ENSG00000206337	hsa-miR-23a-3p	ENSG00000160712	3.83795e-05	0.552602	CL
ENSG00000246582	hsa-miR-320a	ENSG00000026103	3.83813e-05	0.552601	CL
ENSG00000258708	hsa-miR-16-5p	ENSG00000164327	3.88889e-05	0.552263	CL
ENSG00000236333	hsa-miR-146a-5p	ENSG00000089250	3.90644e-05	0.552148	CL
ENSG00000177640	hsa-miR-218-5p	ENSG00000141232	3.90929e-05	0.552129	CL
ENSG00000259134	hsa-miR-542-3p	ENSG00000091879	3.92325e-05	0.552038	CL
ENSG00000214106	hsa-miR-21-5p	ENSG00000164342	3.94887e-05	0.55187	CL
ENSG00000255198	hsa-miR-21-5p	ENSG00000177889	3.9905e-05	0.551601	CL
ENSG00000222041	hsa-miR-383-5p	ENSG00000125347	4.04839e-05	0.55123	CL
ENSG00000247271	hsa-miR-9-5p	ENSG00000075239	4.07882e-05	0.551037	CL
ENSG00000222041	hsa-miR-24-3p	ENSG00000134970	4.07906e-05	0.551035	CL
ENSG00000239265	hsa-miR-200b-3p	ENSG00000010704	4.09728e-05	0.550921	CL
ENSG00000239265	hsa-miR-200c-3p	ENSG00000010704	4.09728e-05	0.550921	CL
ENSG00000248698	hsa-miR-326	ENSG00000010278	4.09835e-05	0.550914	CL
ENSG00000230565	hsa-miR-106a-5p	ENSG00000149311	4.10862e-05	0.550849	CL
ENSG00000206337	hsa-miR-155-5p	ENSG00000185338	4.12657e-05	0.550737	CL
ENSG00000206337	hsa-miR-221-3p	ENSG00000185338	4.12657e-05	0.550737	CL
ENSG00000206337	hsa-let-7i-5p	ENSG00000185338	4.12657e-05	0.550737	CL
ENSG00000206337	hsa-miR-30b-5p	ENSG00000185338	4.12657e-05	0.550737	CL
ENSG00000218510	hsa-miR-19b-3p	ENSG00000137869	4.13293e-05	0.550697	CL
ENSG00000218510	hsa-miR-378a-3p	ENSG00000137869	4.13293e-05	0.550697	CL
ENSG00000218510	hsa-miR-106a-5p	ENSG00000137869	4.13293e-05	0.550697	CL
ENSG00000218510	hsa-miR-106a-5p	ENSG00000136634	4.13299e-05	0.550697	CL
ENSG00000218510	hsa-miR-19a-3p	ENSG00000136634	4.13299e-05	0.550697	CL
ENSG00000222041	hsa-miR-1-3p	ENSG00000247596	4.14668e-05	0.550611	CL
ENSG00000177640	hsa-miR-125b-5p	ENSG00000138696	4.1517e-05	0.55058	CL
ENSG00000156273	hsa-miR-129-5p	ENSG00000185591	4.15326e-05	0.550571	CL
ENSG00000156273	hsa-miR-24-3p	ENSG00000185591	4.15326e-05	0.550571	CL
ENSG00000156273	hsa-miR-137	ENSG00000185591	4.15326e-05	0.550571	CL
ENSG00000156273	hsa-miR-1-3p	ENSG00000185591	4.15326e-05	0.550571	CL
ENSG00000156273	hsa-miR-133a-3p	ENSG00000185591	4.15326e-05	0.550571	CL
ENSG00000156273	hsa-miR-330-3p	ENSG00000185591	4.15326e-05	0.550571	CL
ENSG00000245067	hsa-miR-205-5p	ENSG00000008517	4.19047e-05	0.55034	CL
ENSG00000273032	hsa-miR-203a-3p	ENSG00000197122	4.20545e-05	0.550248	CL
ENSG00000273032	hsa-miR-34a-5p	ENSG00000197122	4.20545e-05	0.550248	CL
ENSG00000255693	hsa-miR-190a-5p	ENSG00000185760	4.21806e-05	0.550171	CL
ENSG00000179840	hsa-let-7a-5p	ENSG00000064012	4.22397e-05	0.550135	CL
ENSG00000249464	hsa-miR-23a-3p	ENSG00000119408	4.22993e-05	0.550098	CL
ENSG00000232021	hsa-miR-23a-3p	ENSG00000026103	4.23308e-05	0.550079	CL
ENSG00000243701	hsa-miR-196a-5p	ENSG00000163220	4.23553e-05	0.550064	CL
ENSG00000227487	hsa-miR-329-3p	ENSG00000141867	4.23785e-05	0.55005	CL
ENSG00000205704	hsa-miR-150-5p	ENSG00000089041	4.244e-05	0.550012	CL
ENSG00000214106	hsa-miR-21-5p	ENSG00000168610	4.24839e-05	0.549986	CL
ENSG00000214106	hsa-miR-874-3p	ENSG00000168610	4.24839e-05	0.549986	CL
ENSG00000214106	hsa-miR-223-3p	ENSG00000168610	4.24839e-05	0.549986	CL
ENSG00000214106	hsa-miR-181a-5p	ENSG00000168610	4.24839e-05	0.549986	CL
ENSG00000280798	hsa-miR-155-5p	ENSG00000162105	4.25629e-05	0.549937	CL
ENSG00000223773	hsa-miR-106a-5p	ENSG00000136634	4.2576e-05	0.54993	CL
ENSG00000223773	hsa-miR-194-5p	ENSG00000136634	4.2576e-05	0.54993	CL
ENSG00000223773	hsa-miR-19a-3p	ENSG00000136634	4.2576e-05	0.54993	CL
ENSG00000248508	hsa-miR-199a-5p	ENSG00000121900	4.25788e-05	0.549928	CL
ENSG00000260032	hsa-miR-363-3p	ENSG00000095951	4.28306e-05	0.549775	CL
ENSG00000231419	hsa-miR-205-5p	ENSG00000169554	4.3292e-05	0.549498	CL
ENSG00000231419	hsa-miR-203a-3p	ENSG00000169554	4.3292e-05	0.549498	CL
ENSG00000206337	hsa-miR-124-3p	ENSG00000177105	4.34669e-05	0.549394	CL
ENSG00000249464	hsa-miR-383-5p	ENSG00000165672	4.35392e-05	0.54935	CL
ENSG00000249464	hsa-miR-23b-3p	ENSG00000165672	4.35392e-05	0.54935	CL
ENSG00000226051	hsa-miR-196a-5p	ENSG00000163220	4.37825e-05	0.549206	CL
ENSG00000223573	hsa-let-7b-5p	ENSG00000107864	4.40941e-05	0.549022	CL
ENSG00000206337	hsa-miR-125a-5p	ENSG00000105851	4.41328e-05	0.548999	CL
ENSG00000206337	hsa-miR-29b-3p	ENSG00000105851	4.41328e-05	0.548999	CL
ENSG00000206337	hsa-miR-27a-3p	ENSG00000105851	4.41328e-05	0.548999	CL
ENSG00000186594	hsa-miR-133a-3p	ENSG00000164023	4.43412e-05	0.548877	CL
ENSG00000218510	hsa-miR-320a	ENSG00000091483	4.43482e-05	0.548873	CL
ENSG00000223773	hsa-miR-29a-3p	ENSG00000167333	4.44026e-05	0.548841	CL
ENSG00000248019	hsa-miR-146a-5p	ENSG00000198712	4.4489e-05	0.548791	CL
ENSG00000258867	hsa-miR-205-5p	ENSG00000162892	4.4745e-05	0.548642	CL
ENSG00000245060	hsa-miR-146a-5p	ENSG00000067560	4.48547e-05	0.548578	CL
ENSG00000245060	hsa-miR-133b	ENSG00000067560	4.48547e-05	0.548578	CL
ENSG00000245060	hsa-miR-185-5p	ENSG00000067560	4.48547e-05	0.548578	CL
ENSG00000245060	hsa-miR-101-3p	ENSG00000067560	4.48547e-05	0.548578	CL
ENSG00000245060	hsa-miR-125a-3p	ENSG00000067560	4.48547e-05	0.548578	CL
ENSG00000215424	hsa-miR-26a-5p	ENSG00000134744	4.48751e-05	0.548566	CL
ENSG00000273032	hsa-miR-107	ENSG00000171132	4.50546e-05	0.548463	CL
ENSG00000272168	hsa-miR-140-5p	ENSG00000102678	4.50872e-05	0.548444	CL
ENSG00000272168	hsa-miR-26a-5p	ENSG00000102678	4.50872e-05	0.548444	CL
ENSG00000249859	hsa-miR-15b-5p	ENSG00000087088	4.50956e-05	0.548439	CL
ENSG00000249859	hsa-miR-128-3p	ENSG00000087088	4.50956e-05	0.548439	CL
ENSG00000249859	hsa-miR-365a-3p	ENSG00000087088	4.50956e-05	0.548439	CL
ENSG00000249859	hsa-miR-148a-3p	ENSG00000087088	4.50956e-05	0.548439	CL
ENSG00000249859	hsa-miR-214-3p	ENSG00000087088	4.50956e-05	0.548439	CL
ENSG00000228784	hsa-miR-140-5p	ENSG00000061273	4.57234e-05	0.54808	CL
ENSG00000245060	hsa-miR-181b-5p	ENSG00000134970	4.58312e-05	0.548018	CL
ENSG00000245060	hsa-miR-221-3p	ENSG00000134970	4.58312e-05	0.548018	CL
ENSG00000236901	hsa-miR-199a-5p	ENSG00000110400	4.60361e-05	0.547902	CL
ENSG00000228784	hsa-miR-143-3p	ENSG00000124782	4.60379e-05	0.547901	CL
ENSG00000245573	hsa-miR-181a-5p	ENSG00000174775	4.60382e-05	0.547901	CL
ENSG00000245573	hsa-miR-143-3p	ENSG00000174775	4.60382e-05	0.547901	CL
ENSG00000204623	hsa-miR-214-3p	ENSG00000164050	4.61734e-05	0.547825	CL
ENSG00000228486	hsa-miR-421	ENSG00000149311	4.6353e-05	0.547724	CL
ENSG00000228486	hsa-miR-203a-3p	ENSG00000149311	4.6353e-05	0.547724	CL
ENSG00000227115	hsa-miR-145-5p	ENSG00000165795	4.64688e-05	0.547659	CL
ENSG00000176124	hsa-miR-186-5p	ENSG00000249859	4.65723e-05	0.547601	CL
ENSG00000272168	hsa-miR-33a-5p	ENSG00000197122	4.69558e-05	0.547387	CL
ENSG00000272168	hsa-miR-33b-5p	ENSG00000197122	4.69558e-05	0.547387	CL
ENSG00000272168	hsa-miR-203a-3p	ENSG00000197122	4.69558e-05	0.547387	CL
ENSG00000196951	hsa-miR-145-5p	ENSG00000166323	4.69782e-05	0.547375	CL
ENSG00000176840	hsa-miR-140-5p	ENSG00000108960	4.71153e-05	0.547299	CL
ENSG00000280798	hsa-miR-21-5p	ENSG00000176788	4.74381e-05	0.54712	CL
ENSG00000223773	hsa-miR-491-5p	ENSG00000166337	4.74854e-05	0.547094	CL
ENSG00000245526	hsa-miR-342-3p	ENSG00000172201	4.75522e-05	0.547058	CL
ENSG00000118412	hsa-miR-106a-5p	ENSG00000103479	4.77671e-05	0.54694	CL
ENSG00000225791	hsa-miR-192-5p	ENSG00000196776	4.77708e-05	0.546938	CL
ENSG00000279078	hsa-miR-15b-5p	ENSG00000117020	4.78458e-05	0.546897	CL
ENSG00000279078	hsa-miR-16-5p	ENSG00000117020	4.78458e-05	0.546897	CL
ENSG00000279078	hsa-miR-15a-5p	ENSG00000117020	4.78458e-05	0.546897	CL
ENSG00000279078	hsa-miR-29b-3p	ENSG00000117020	4.78458e-05	0.546897	CL
ENSG00000229619	hsa-miR-203a-3p	ENSG00000169554	4.80584e-05	0.546781	CL
ENSG00000229619	hsa-miR-590-3p	ENSG00000169554	4.80584e-05	0.546781	CL
ENSG00000229619	hsa-miR-221-3p	ENSG00000169554	4.80584e-05	0.546781	CL
ENSG00000229619	hsa-miR-101-3p	ENSG00000169554	4.80584e-05	0.546781	CL
ENSG00000179840	hsa-miR-24-3p	ENSG00000204103	4.80657e-05	0.546777	CL
ENSG00000226051	hsa-miR-1-3p	ENSG00000158710	4.82011e-05	0.546704	CL
ENSG00000177640	hsa-miR-101-3p	ENSG00000096968	4.82034e-05	0.546703	CL
ENSG00000177640	hsa-miR-135a-5p	ENSG00000096968	4.82034e-05	0.546703	CL
ENSG00000177640	hsa-miR-125a-5p	ENSG00000096968	4.82034e-05	0.546703	CL
ENSG00000177640	hsa-miR-204-5p	ENSG00000096968	4.82034e-05	0.546703	CL
ENSG00000177640	hsa-miR-125b-5p	ENSG00000096968	4.82034e-05	0.546703	CL
ENSG00000225791	hsa-miR-129-5p	ENSG00000184182	4.82074e-05	0.5467	CL
ENSG00000179314	hsa-miR-24-3p	ENSG00000130669	4.85937e-05	0.546492	CL
ENSG00000243083	hsa-miR-31-5p	ENSG00000007908	4.86776e-05	0.546447	CL
ENSG00000243083	hsa-miR-17-5p	ENSG00000007908	4.86776e-05	0.546447	CL
ENSG00000226051	hsa-miR-206	ENSG00000182718	4.86803e-05	0.546445	CL
ENSG00000226051	hsa-miR-1-3p	ENSG00000182718	4.86803e-05	0.546445	CL
ENSG00000216775	hsa-miR-203a-3p	ENSG00000068796	4.86868e-05	0.546442	CL
ENSG00000206337	hsa-miR-497-5p	ENSG00000183742	4.87412e-05	0.546413	CL
ENSG00000206337	hsa-miR-143-3p	ENSG00000183742	4.87412e-05	0.546413	CL
ENSG00000206337	hsa-miR-200a-3p	ENSG00000183742	4.87412e-05	0.546413	CL
ENSG00000269293	hsa-miR-181b-5p	ENSG00000134970	4.87778e-05	0.546393	CL
ENSG00000204282	hsa-miR-214-3p	ENSG00000187764	4.91344e-05	0.546202	CL
ENSG00000279873	hsa-miR-143-3p	ENSG00000177463	4.92032e-05	0.546166	CL
ENSG00000281357	hsa-miR-17-5p	ENSG00000170276	4.92781e-05	0.546126	CL
ENSG00000237984	hsa-miR-29a-3p	ENSG00000110987	4.92877e-05	0.546121	CL
ENSG00000249464	hsa-miR-200c-3p	ENSG00000114209	4.94546e-05	0.546032	CL
ENSG00000177757	hsa-miR-106a-5p	ENSG00000197548	4.97152e-05	0.545895	CL
ENSG00000274956	hsa-miR-128-3p	ENSG00000077279	5.03152e-05	0.54558	CL
ENSG00000267454	hsa-miR-150-5p	ENSG00000141480	5.04435e-05	0.545513	CL
ENSG00000231290	hsa-miR-205-5p	ENSG00000160789	5.04768e-05	0.545496	CL
ENSG00000256073	hsa-miR-155-5p	ENSG00000228408	5.06132e-05	0.545425	CL
ENSG00000256073	hsa-miR-23b-3p	ENSG00000228408	5.06132e-05	0.545425	CL
ENSG00000204650	hsa-miR-181b-5p	ENSG00000120251	5.07384e-05	0.545361	CL
ENSG00000226051	hsa-miR-23a-3p	ENSG00000026103	5.09169e-05	0.545268	CL
ENSG00000131797	hsa-miR-24-3p	ENSG00000061938	5.09632e-05	0.545244	CL
ENSG00000225470	hsa-miR-181b-5p	ENSG00000114209	5.12008e-05	0.545122	CL
ENSG00000258708	hsa-miR-137	ENSG00000058335	5.12653e-05	0.545089	CL
ENSG00000226950	hsa-miR-874-3p	ENSG00000127445	5.12911e-05	0.545076	CL
ENSG00000272168	hsa-miR-338-3p	ENSG00000179456	5.16743e-05	0.544881	CL
ENSG00000156273	hsa-miR-24-3p	ENSG00000110917	5.18624e-05	0.544785	CL
ENSG00000274956	hsa-miR-136-5p	ENSG00000075391	5.2181e-05	0.544624	CL
ENSG00000245526	hsa-miR-191-5p	ENSG00000115008	5.22658e-05	0.544581	CL
ENSG00000225953	hsa-miR-26a-5p	ENSG00000007171	5.23541e-05	0.544537	CL
ENSG00000206337	hsa-miR-92a-3p	ENSG00000108700	5.23572e-05	0.544535	CL
ENSG00000215256	hsa-miR-106a-5p	ENSG00000085871	5.24374e-05	0.544495	CL
ENSG00000231028	hsa-miR-186-5p	ENSG00000152661	5.24464e-05	0.544491	CL
ENSG00000231028	hsa-miR-221-3p	ENSG00000152661	5.24464e-05	0.544491	CL
ENSG00000231028	hsa-miR-222-3p	ENSG00000152661	5.24464e-05	0.544491	CL
ENSG00000277147	hsa-miR-145-5p	ENSG00000151247	5.26374e-05	0.544395	CL
ENSG00000243701	hsa-miR-127-3p	ENSG00000170542	5.28931e-05	0.544267	CL
ENSG00000226137	hsa-miR-302a-3p	ENSG00000033327	5.29858e-05	0.544221	CL
ENSG00000226137	hsa-miR-302c-3p	ENSG00000033327	5.29858e-05	0.544221	CL
ENSG00000176124	hsa-miR-497-5p	ENSG00000151247	5.32854e-05	0.544073	CL
ENSG00000176124	hsa-miR-145-5p	ENSG00000151247	5.32854e-05	0.544073	CL
ENSG00000249464	hsa-miR-30a-5p	ENSG00000169857	5.3533e-05	0.54395	CL
ENSG00000260852	hsa-miR-143-3p	ENSG00000177463	5.37051e-05	0.543866	CL
ENSG00000260032	hsa-miR-155-5p	ENSG00000169057	5.38994e-05	0.543771	CL
ENSG00000265688	hsa-miR-24-3p	ENSG00000132646	5.39067e-05	0.543767	CL
ENSG00000267339	hsa-miR-24-3p	ENSG00000119950	5.39267e-05	0.543757	CL
ENSG00000267339	hsa-miR-155-5p	ENSG00000119950	5.39267e-05	0.543757	CL
ENSG00000100181	hsa-miR-28-5p	ENSG00000167770	5.40629e-05	0.543691	CL
ENSG00000100181	hsa-miR-542-3p	ENSG00000167770	5.40629e-05	0.543691	CL
ENSG00000223773	hsa-miR-152-3p	ENSG00000204103	5.42128e-05	0.543618	CL
ENSG00000223773	hsa-miR-148a-3p	ENSG00000204103	5.42128e-05	0.543618	CL
ENSG00000223773	hsa-miR-130a-3p	ENSG00000204103	5.42128e-05	0.543618	CL
ENSG00000223773	hsa-miR-223-3p	ENSG00000204103	5.42128e-05	0.543618	CL
ENSG00000223773	hsa-miR-425-5p	ENSG00000204103	5.42128e-05	0.543618	CL
ENSG00000243083	hsa-miR-203a-3p	ENSG00000232810	5.42479e-05	0.543601	CL
ENSG00000243083	hsa-miR-187-3p	ENSG00000232810	5.42479e-05	0.543601	CL
ENSG00000243083	hsa-miR-17-5p	ENSG00000232810	5.42479e-05	0.543601	CL
ENSG00000218510	hsa-miR-106a-5p	ENSG00000197548	5.44694e-05	0.543493	CL
ENSG00000260032	hsa-miR-378a-3p	ENSG00000141068	5.4649e-05	0.543406	CL
ENSG00000204282	hsa-miR-128-3p	ENSG00000154928	5.48564e-05	0.543306	CL
ENSG00000216775	hsa-miR-135b-5p	ENSG00000175175	5.49174e-05	0.543277	CL
ENSG00000216775	hsa-miR-135a-5p	ENSG00000175175	5.49174e-05	0.543277	CL
ENSG00000279873	hsa-miR-16-5p	ENSG00000196498	5.50755e-05	0.543201	CL
ENSG00000279873	hsa-miR-125b-5p	ENSG00000196498	5.50755e-05	0.543201	CL
ENSG00000204650	hsa-miR-186-5p	ENSG00000101349	5.52325e-05	0.543126	CL
ENSG00000279078	hsa-miR-29b-3p	ENSG00000068024	5.53482e-05	0.54307	CL
ENSG00000258867	hsa-miR-137	ENSG00000196136	5.59845e-05	0.542768	CL
ENSG00000248049	hsa-miR-141-3p	ENSG00000151247	5.59913e-05	0.542765	CL
ENSG00000248049	hsa-miR-497-5p	ENSG00000151247	5.59913e-05	0.542765	CL
ENSG00000245526	hsa-miR-31-5p	ENSG00000110436	5.60973e-05	0.542715	CL
ENSG00000245526	hsa-miR-200c-3p	ENSG00000110436	5.60973e-05	0.542715	CL
ENSG00000225470	hsa-miR-140-5p	ENSG00000081087	5.62101e-05	0.542662	CL
ENSG00000235958	hsa-miR-18b-5p	ENSG00000100354	5.62223e-05	0.542656	CL
ENSG00000260852	hsa-miR-145-5p	ENSG00000157764	5.6416e-05	0.542565	CL
ENSG00000260852	hsa-miR-143-3p	ENSG00000157764	5.6416e-05	0.542565	CL
ENSG00000245060	hsa-miR-133b	ENSG00000067225	5.64382e-05	0.542554	CL
ENSG00000272168	hsa-miR-223-3p	ENSG00000117569	5.64829e-05	0.542533	CL
ENSG00000280798	hsa-miR-200c-3p	ENSG00000067606	5.66405e-05	0.54246	CL
ENSG00000179840	hsa-miR-150-5p	ENSG00000141480	5.67076e-05	0.542428	CL
ENSG00000255693	hsa-miR-185-5p	ENSG00000172350	5.67171e-05	0.542424	CL
ENSG00000222041	hsa-miR-185-5p	ENSG00000067560	5.70918e-05	0.542249	CL
ENSG00000222041	hsa-miR-125a-3p	ENSG00000067560	5.70918e-05	0.542249	CL
ENSG00000234420	hsa-miR-146a-5p	ENSG00000134250	5.72555e-05	0.542174	CL
ENSG00000237125	hsa-miR-101-3p	ENSG00000104313	5.72806e-05	0.542162	CL
ENSG00000245573	hsa-miR-214-3p	ENSG00000101843	5.73825e-05	0.542115	CL
ENSG00000245573	hsa-miR-505-3p	ENSG00000101843	5.73825e-05	0.542115	CL
ENSG00000229619	hsa-miR-30c-5p	ENSG00000170606	5.75361e-05	0.542044	CL
ENSG00000245067	hsa-miR-27b-3p	ENSG00000111424	5.76259e-05	0.542003	CL
ENSG00000277147	hsa-miR-139-5p	ENSG00000114023	5.82517e-05	0.541716	CL
ENSG00000171101	hsa-miR-34a-5p	ENSG00000172216	5.8501e-05	0.541603	CL
ENSG00000234883	hsa-miR-495-3p	ENSG00000108691	5.85113e-05	0.541598	CL
ENSG00000234883	hsa-miR-98-5p	ENSG00000108691	5.85113e-05	0.541598	CL
ENSG00000248019	hsa-miR-302d-3p	ENSG00000213928	5.85264e-05	0.541591	CL
ENSG00000206337	hsa-miR-155-5p	ENSG00000182578	5.8527e-05	0.541591	CL
ENSG00000206337	hsa-miR-22-3p	ENSG00000182578	5.8527e-05	0.541591	CL
ENSG00000247240	hsa-let-7i-5p	ENSG00000168090	5.87006e-05	0.541512	CL
ENSG00000247240	hsa-let-7f-5p	ENSG00000168090	5.87006e-05	0.541512	CL
ENSG00000247240	hsa-let-7c-5p	ENSG00000168090	5.87006e-05	0.541512	CL
ENSG00000206344	hsa-miR-29a-3p	ENSG00000185499	5.87367e-05	0.541496	CL
ENSG00000206344	hsa-miR-125b-5p	ENSG00000185499	5.87367e-05	0.541496	CL
ENSG00000223773	hsa-miR-223-3p	ENSG00000081041	5.87841e-05	0.541474	CL
ENSG00000245526	hsa-miR-92b-3p	ENSG00000087095	5.88655e-05	0.541438	CL
ENSG00000249464	hsa-miR-449a	ENSG00000126458	5.88986e-05	0.541423	CL
ENSG00000260032	hsa-miR-21-5p	ENSG00000152409	5.89261e-05	0.54141	CL
ENSG00000269293	hsa-miR-10a-5p	ENSG00000105698	5.90654e-05	0.541347	CL
ENSG00000269293	hsa-miR-362-3p	ENSG00000105698	5.90654e-05	0.541347	CL
ENSG00000234883	hsa-miR-223-3p	ENSG00000128342	5.90667e-05	0.541347	CL
ENSG00000088970	hsa-miR-106a-5p	ENSG00000110092	5.91366e-05	0.541315	CL
ENSG00000237984	hsa-miR-204-5p	ENSG00000124766	5.91502e-05	0.541309	CL
ENSG00000237984	hsa-miR-129-5p	ENSG00000124766	5.91502e-05	0.541309	CL
ENSG00000237984	hsa-miR-211-5p	ENSG00000124766	5.91502e-05	0.541309	CL
ENSG00000237984	hsa-miR-338-3p	ENSG00000124766	5.91502e-05	0.541309	CL
ENSG00000250033	hsa-miR-137	ENSG00000069667	5.92959e-05	0.541244	CL
ENSG00000254377	hsa-miR-363-3p	ENSG00000109670	5.93279e-05	0.54123	CL
ENSG00000254377	hsa-miR-92a-3p	ENSG00000109670	5.93279e-05	0.54123	CL
ENSG00000254377	hsa-miR-27a-3p	ENSG00000109670	5.93279e-05	0.54123	CL
ENSG00000254377	hsa-miR-25-3p	ENSG00000109670	5.93279e-05	0.54123	CL
ENSG00000254377	hsa-miR-155-5p	ENSG00000109670	5.93279e-05	0.54123	CL
ENSG00000226051	hsa-miR-1-3p	ENSG00000271303	5.94726e-05	0.541165	CL
ENSG00000218510	hsa-miR-128-3p	ENSG00000168040	5.98462e-05	0.540998	CL
ENSG00000255198	hsa-miR-21-5p	ENSG00000171863	6.00788e-05	0.540895	CL
ENSG00000214106	hsa-miR-145-5p	ENSG00000158769	6.02526e-05	0.540818	CL
ENSG00000242516	hsa-miR-107	ENSG00000107295	6.0415e-05	0.540746	CL
ENSG00000156273	hsa-miR-194-5p	ENSG00000153922	6.06986e-05	0.540622	CL
ENSG00000245060	hsa-miR-124-3p	ENSG00000137312	6.07916e-05	0.540581	CL
ENSG00000245060	hsa-miR-485-5p	ENSG00000137312	6.07916e-05	0.540581	CL
ENSG00000214106	hsa-miR-145-5p	ENSG00000136379	6.0825e-05	0.540566	CL
ENSG00000204650	hsa-miR-145-5p	ENSG00000125821	6.08717e-05	0.540546	CL
ENSG00000229619	hsa-miR-101-3p	ENSG00000187098	6.12008e-05	0.540402	CL
ENSG00000229619	hsa-miR-218-5p	ENSG00000187098	6.12008e-05	0.540402	CL
ENSG00000204650	hsa-miR-205-5p	ENSG00000065361	6.12938e-05	0.540362	CL
ENSG00000204650	hsa-miR-199a-5p	ENSG00000065361	6.12938e-05	0.540362	CL
ENSG00000245526	hsa-miR-335-3p	ENSG00000007372	6.14569e-05	0.540291	CL
ENSG00000245526	hsa-miR-488-3p	ENSG00000007372	6.14569e-05	0.540291	CL
ENSG00000245526	hsa-miR-140-5p	ENSG00000007372	6.14569e-05	0.540291	CL
ENSG00000206337	hsa-miR-221-3p	ENSG00000184979	6.16009e-05	0.540228	CL
ENSG00000269293	hsa-miR-196a-5p	ENSG00000173465	6.16444e-05	0.54021	CL
ENSG00000225791	hsa-miR-9-5p	ENSG00000057663	6.17576e-05	0.540161	CL
ENSG00000279873	hsa-miR-125b-5p	ENSG00000063438	6.1954e-05	0.540076	CL
ENSG00000180769	hsa-miR-320a	ENSG00000240583	6.2026e-05	0.540045	CL
ENSG00000221990	hsa-miR-17-5p	ENSG00000170276	6.20928e-05	0.540016	CL
ENSG00000226051	hsa-miR-196a-5p	ENSG00000130592	6.21537e-05	0.53999	CL
ENSG00000269293	hsa-miR-129-5p	ENSG00000187778	6.25388e-05	0.539825	CL
ENSG00000230006	hsa-miR-374a-5p	ENSG00000277363	6.29266e-05	0.53966	CL
ENSG00000230006	hsa-miR-150-5p	ENSG00000277363	6.29266e-05	0.53966	CL
ENSG00000230006	hsa-miR-873-5p	ENSG00000277363	6.29266e-05	0.53966	CL
ENSG00000177640	hsa-miR-1-3p	ENSG00000117400	6.2988e-05	0.539634	CL
ENSG00000177640	hsa-miR-28-5p	ENSG00000117400	6.2988e-05	0.539634	CL
ENSG00000260455	hsa-miR-190a-5p	ENSG00000128573	6.30501e-05	0.539608	CL
ENSG00000227487	hsa-miR-125a-5p	ENSG00000179361	6.32622e-05	0.539518	CL
ENSG00000227487	hsa-miR-125b-5p	ENSG00000179361	6.32622e-05	0.539518	CL
ENSG00000245017	hsa-miR-122-5p	ENSG00000067560	6.39958e-05	0.53921	CL
ENSG00000171101	hsa-miR-185-5p	ENSG00000110324	6.40633e-05	0.539181	CL
ENSG00000156273	hsa-miR-224-5p	ENSG00000163661	6.46266e-05	0.538947	CL
ENSG00000245060	hsa-miR-146a-5p	ENSG00000198612	6.46426e-05	0.53894	CL
ENSG00000206337	hsa-let-7e-5p	ENSG00000017427	6.48038e-05	0.538874	CL
ENSG00000206337	hsa-miR-27a-3p	ENSG00000017427	6.48038e-05	0.538874	CL
ENSG00000206337	hsa-miR-128-3p	ENSG00000017427	6.48038e-05	0.538874	CL
ENSG00000206337	hsa-miR-29a-3p	ENSG00000017427	6.48038e-05	0.538874	CL
ENSG00000206337	hsa-miR-18b-5p	ENSG00000017427	6.48038e-05	0.538874	CL
ENSG00000206337	hsa-let-7i-5p	ENSG00000017427	6.48038e-05	0.538874	CL
ENSG00000279873	hsa-miR-144-3p	ENSG00000148400	6.49203e-05	0.538825	CL
ENSG00000279873	hsa-miR-326	ENSG00000148400	6.49203e-05	0.538825	CL
ENSG00000279873	hsa-miR-27b-3p	ENSG00000148400	6.49203e-05	0.538825	CL
ENSG00000206337	hsa-miR-211-5p	ENSG00000110324	6.50395e-05	0.538776	CL
ENSG00000206337	hsa-miR-15a-5p	ENSG00000110324	6.50395e-05	0.538776	CL
ENSG00000245573	hsa-let-7i-5p	ENSG00000139352	6.50623e-05	0.538767	CL
ENSG00000236824	hsa-miR-107	ENSG00000168539	6.53258e-05	0.538659	CL
ENSG00000269821	hsa-miR-106a-5p	ENSG00000118513	6.53966e-05	0.53863	CL
ENSG00000248698	hsa-miR-326	ENSG00000113578	6.55576e-05	0.538564	CL
ENSG00000229694	hsa-miR-222-3p	ENSG00000007908	6.58089e-05	0.538461	CL
ENSG00000223773	hsa-miR-200b-3p	ENSG00000010704	6.58363e-05	0.53845	CL
ENSG00000223773	hsa-miR-200c-3p	ENSG00000010704	6.58363e-05	0.53845	CL
ENSG00000215424	hsa-miR-130a-3p	ENSG00000066739	6.62174e-05	0.538295	CL
ENSG00000196951	hsa-miR-19a-3p	ENSG00000091513	6.62317e-05	0.538289	CL
ENSG00000180769	hsa-miR-1-3p	ENSG00000120742	6.64452e-05	0.538203	CL
ENSG00000224687	hsa-miR-140-5p	ENSG00000108960	6.65938e-05	0.538143	CL
ENSG00000280798	hsa-miR-107	ENSG00000100604	6.66093e-05	0.538137	CL
ENSG00000067992	hsa-miR-106a-5p	ENSG00000136634	6.66096e-05	0.538137	CL
ENSG00000223773	hsa-miR-375	ENSG00000107968	6.66407e-05	0.538124	CL
ENSG00000223773	hsa-miR-144-3p	ENSG00000107968	6.66407e-05	0.538124	CL
ENSG00000239265	hsa-miR-21-5p	ENSG00000034152	6.67705e-05	0.538072	CL
ENSG00000246582	hsa-miR-24-3p	ENSG00000102879	6.68544e-05	0.538038	CL
ENSG00000226051	hsa-miR-346	ENSG00000172638	6.71566e-05	0.537917	CL
ENSG00000273311	hsa-miR-192-5p	ENSG00000099956	6.72129e-05	0.537894	CL
ENSG00000280798	hsa-miR-107	ENSG00000107295	6.72848e-05	0.537866	CL
ENSG00000260455	hsa-miR-129-5p	ENSG00000124766	6.78692e-05	0.537633	CL
ENSG00000260455	hsa-miR-212-3p	ENSG00000124766	6.78692e-05	0.537633	CL
ENSG00000260455	hsa-miR-132-3p	ENSG00000124766	6.78692e-05	0.537633	CL
ENSG00000260455	hsa-miR-335-5p	ENSG00000124766	6.78692e-05	0.537633	CL
ENSG00000176124	hsa-miR-182-5p	ENSG00000183765	6.82456e-05	0.537484	CL
ENSG00000260032	hsa-miR-26b-5p	ENSG00000124486	6.82676e-05	0.537476	CL
ENSG00000237149	hsa-miR-106a-5p	ENSG00000165806	6.89283e-05	0.537217	CL
ENSG00000267858	hsa-miR-7-5p	ENSG00000171608	6.92836e-05	0.537078	CL
ENSG00000232656	hsa-miR-145-5p	ENSG00000148700	6.9819e-05	0.536871	CL
ENSG00000215417	hsa-miR-129-5p	ENSG00000114770	7.06099e-05	0.536567	CL
ENSG00000227487	hsa-miR-18a-5p	ENSG00000155111	7.07083e-05	0.536529	CL
ENSG00000237310	hsa-miR-106a-5p	ENSG00000137869	7.07684e-05	0.536506	CL
ENSG00000235703	hsa-let-7a-5p	ENSG00000134698	7.07929e-05	0.536497	CL
ENSG00000215417	hsa-miR-155-5p	ENSG00000176953	7.11862e-05	0.536347	CL
ENSG00000177112	hsa-miR-19a-3p	ENSG00000091513	7.12532e-05	0.536322	CL
ENSG00000267064	hsa-miR-210-3p	ENSG00000010671	7.18895e-05	0.536082	CL
ENSG00000177112	hsa-let-7a-5p	ENSG00000174775	7.19359e-05	0.536064	CL
ENSG00000177112	hsa-let-7b-5p	ENSG00000174775	7.19359e-05	0.536064	CL
ENSG00000206337	hsa-miR-92a-3p	ENSG00000110848	7.20682e-05	0.536015	CL
ENSG00000204282	hsa-miR-145-5p	ENSG00000163517	7.24001e-05	0.535891	CL
ENSG00000237984	hsa-miR-20a-5p	ENSG00000023287	7.25777e-05	0.535824	CL
ENSG00000237984	hsa-miR-20b-5p	ENSG00000023287	7.25777e-05	0.535824	CL
ENSG00000206337	hsa-miR-17-5p	ENSG00000120885	7.26101e-05	0.535812	CL
ENSG00000258867	hsa-miR-138-5p	ENSG00000114353	7.27575e-05	0.535757	CL
ENSG00000232520	hsa-miR-103a-3p	ENSG00000167588	7.28469e-05	0.535724	CL
ENSG00000225953	hsa-miR-330-5p	ENSG00000184588	7.30314e-05	0.535656	CL
ENSG00000214381	hsa-miR-192-5p	ENSG00000196639	7.3502e-05	0.535482	CL
ENSG00000245067	hsa-miR-27a-3p	ENSG00000188641	7.36424e-05	0.53543	CL
ENSG00000245067	hsa-miR-27b-3p	ENSG00000188641	7.36424e-05	0.53543	CL
ENSG00000245067	hsa-miR-302b-3p	ENSG00000188641	7.36424e-05	0.53543	CL
ENSG00000277147	hsa-miR-1-3p	ENSG00000247596	7.38263e-05	0.535363	CL
ENSG00000226051	hsa-miR-1-3p	ENSG00000169299	7.402e-05	0.535292	CL
ENSG00000176840	hsa-miR-138-5p	ENSG00000160678	7.40693e-05	0.535274	CL
ENSG00000223773	hsa-miR-27b-3p	ENSG00000132170	7.45559e-05	0.535096	CL
ENSG00000223773	hsa-miR-130a-3p	ENSG00000132170	7.45559e-05	0.535096	CL
ENSG00000223773	hsa-miR-20b-5p	ENSG00000132170	7.45559e-05	0.535096	CL
ENSG00000223773	hsa-miR-20a-5p	ENSG00000132170	7.45559e-05	0.535096	CL
ENSG00000223773	hsa-miR-27a-3p	ENSG00000132170	7.45559e-05	0.535096	CL
ENSG00000223773	hsa-miR-130b-3p	ENSG00000132170	7.45559e-05	0.535096	CL
ENSG00000260339	hsa-miR-145-5p	ENSG00000113742	7.46627e-05	0.535057	CL
ENSG00000260339	hsa-miR-26a-5p	ENSG00000113742	7.46627e-05	0.535057	CL
ENSG00000260339	hsa-let-7b-5p	ENSG00000113742	7.46627e-05	0.535057	CL
ENSG00000236824	hsa-miR-106b-5p	ENSG00000172465	7.49586e-05	0.53495	CL
ENSG00000236824	hsa-miR-22-3p	ENSG00000172465	7.49586e-05	0.53495	CL
ENSG00000236824	hsa-miR-17-5p	ENSG00000172465	7.49586e-05	0.53495	CL
ENSG00000236824	hsa-miR-20a-5p	ENSG00000172465	7.49586e-05	0.53495	CL
ENSG00000260032	hsa-miR-32-5p	ENSG00000131323	7.51944e-05	0.534865	CL
ENSG00000226051	hsa-miR-205-5p	ENSG00000008517	7.52933e-05	0.534829	CL
ENSG00000258708	hsa-miR-155-5p	ENSG00000198105	7.53752e-05	0.5348	CL
ENSG00000225791	hsa-miR-203a-3p	ENSG00000175334	7.53769e-05	0.534799	CL
ENSG00000249464	hsa-miR-23a-3p	ENSG00000198121	7.54348e-05	0.534778	CL
ENSG00000249464	hsa-miR-200c-3p	ENSG00000198121	7.54348e-05	0.534778	CL
ENSG00000273032	hsa-miR-203a-3p	ENSG00000104381	7.5502e-05	0.534754	CL
ENSG00000255571	hsa-miR-340-5p	ENSG00000138764	7.57808e-05	0.534654	CL
ENSG00000280798	hsa-miR-122-5p	ENSG00000123612	7.66192e-05	0.534355	CL
ENSG00000280798	hsa-miR-376b-3p	ENSG00000123612	7.66192e-05	0.534355	CL
ENSG00000280798	hsa-miR-376a-3p	ENSG00000123612	7.66192e-05	0.534355	CL
ENSG00000223773	hsa-miR-421	ENSG00000142082	7.67636e-05	0.534304	CL
ENSG00000215424	hsa-miR-155-5p	ENSG00000147548	7.68782e-05	0.534264	CL
ENSG00000227487	hsa-miR-125b-5p	ENSG00000112242	7.69427e-05	0.534241	CL
ENSG00000227487	hsa-miR-125a-5p	ENSG00000112242	7.69427e-05	0.534241	CL
ENSG00000234492	hsa-miR-203a-3p	ENSG00000068796	7.70519e-05	0.534202	CL
ENSG00000225791	hsa-miR-9-5p	ENSG00000075239	7.7068e-05	0.534197	CL
ENSG00000267586	hsa-miR-21-5p	ENSG00000163823	7.71088e-05	0.534182	CL
ENSG00000267272	hsa-miR-494-3p	ENSG00000091138	7.7235e-05	0.534138	CL
ENSG00000226137	hsa-miR-372-3p	ENSG00000150457	7.72864e-05	0.53412	CL
ENSG00000226137	hsa-miR-373-3p	ENSG00000150457	7.72864e-05	0.53412	CL
ENSG00000214106	hsa-miR-21-5p	ENSG00000152104	7.73819e-05	0.534086	CL
ENSG00000260032	hsa-miR-92a-3p	ENSG00000163349	7.86304e-05	0.533651	CL
ENSG00000245060	hsa-miR-211-5p	ENSG00000182287	7.89399e-05	0.533544	CL
ENSG00000245060	hsa-miR-204-5p	ENSG00000182287	7.89399e-05	0.533544	CL
ENSG00000176124	hsa-miR-372-3p	ENSG00000155366	7.89647e-05	0.533535	CL
ENSG00000176124	hsa-miR-493-5p	ENSG00000155366	7.89647e-05	0.533535	CL
ENSG00000178977	hsa-miR-106a-5p	ENSG00000137869	7.92742e-05	0.533428	CL
ENSG00000277147	hsa-miR-145-5p	ENSG00000175348	7.9462e-05	0.533364	CL
ENSG00000177757	hsa-miR-106a-5p	ENSG00000136634	7.95519e-05	0.533333	CL
ENSG00000177640	hsa-miR-32-5p	ENSG00000114166	7.95634e-05	0.533329	CL
ENSG00000177640	hsa-miR-181a-5p	ENSG00000114166	7.95634e-05	0.533329	CL
ENSG00000177640	hsa-miR-181b-5p	ENSG00000114166	7.95634e-05	0.533329	CL
ENSG00000177640	hsa-miR-92a-3p	ENSG00000114166	7.95634e-05	0.533329	CL
ENSG00000177640	hsa-miR-17-5p	ENSG00000114166	7.95634e-05	0.533329	CL
ENSG00000177640	hsa-miR-25-3p	ENSG00000114166	7.95634e-05	0.533329	CL
ENSG00000267106	hsa-miR-203a-3p	ENSG00000116473	7.98303e-05	0.533238	CL
ENSG00000214106	hsa-miR-181b-5p	ENSG00000150457	8.03378e-05	0.533065	CL
ENSG00000214106	hsa-miR-31-5p	ENSG00000150457	8.03378e-05	0.533065	CL
ENSG00000214106	hsa-miR-181c-5p	ENSG00000150457	8.03378e-05	0.533065	CL
ENSG00000214106	hsa-miR-93-5p	ENSG00000150457	8.03378e-05	0.533065	CL
ENSG00000215424	hsa-miR-24-3p	ENSG00000061938	8.04261e-05	0.533035	CL
ENSG00000258867	hsa-miR-376a-3p	ENSG00000064012	8.05019e-05	0.533009	CL
ENSG00000274956	hsa-miR-487b-3p	ENSG00000187391	8.05348e-05	0.532998	CL
ENSG00000280780	hsa-miR-143-3p	ENSG00000026508	8.12968e-05	0.532741	CL
ENSG00000280780	hsa-miR-708-5p	ENSG00000026508	8.12968e-05	0.532741	CL
ENSG00000260339	hsa-miR-26a-5p	ENSG00000188042	8.15781e-05	0.532647	CL
ENSG00000236333	hsa-miR-21-5p	ENSG00000163536	8.20488e-05	0.53249	CL
ENSG00000176840	hsa-miR-335-5p	ENSG00000155093	8.22223e-05	0.532432	CL
ENSG00000180769	hsa-miR-296-3p	ENSG00000168329	8.25376e-05	0.532327	CL
ENSG00000272168	hsa-miR-148a-3p	ENSG00000100784	8.32737e-05	0.532084	CL
ENSG00000223773	hsa-miR-145-5p	ENSG00000144746	8.35734e-05	0.531986	CL
ENSG00000267454	hsa-miR-181b-5p	ENSG00000118785	8.36456e-05	0.531962	CL
ENSG00000279873	hsa-miR-27a-3p	ENSG00000040199	8.37796e-05	0.531919	CL
ENSG00000255153	hsa-miR-124-3p	ENSG00000177105	8.39553e-05	0.531861	CL
ENSG00000205885	hsa-miR-384	ENSG00000044574	8.40191e-05	0.53184	CL
ENSG00000234420	hsa-miR-146b-5p	ENSG00000138668	8.45419e-05	0.53167	CL
ENSG00000263812	hsa-miR-17-5p	ENSG00000007908	8.47699e-05	0.531597	CL
ENSG00000214106	hsa-miR-21-5p	ENSG00000153904	8.48144e-05	0.531582	CL
ENSG00000248049	hsa-miR-16-5p	ENSG00000213465	8.48747e-05	0.531563	CL
ENSG00000248049	hsa-miR-195-5p	ENSG00000213465	8.48747e-05	0.531563	CL
ENSG00000175061	hsa-miR-215-5p	ENSG00000178585	8.4943e-05	0.531541	CL
ENSG00000214106	hsa-miR-27a-3p	ENSG00000151012	8.50222e-05	0.531515	CL
ENSG00000156273	hsa-miR-302b-3p	ENSG00000188641	8.51325e-05	0.53148	CL
ENSG00000232656	hsa-miR-34a-5p	ENSG00000067715	8.51328e-05	0.53148	CL
ENSG00000258867	hsa-miR-205-5p	ENSG00000068366	8.5366e-05	0.531405	CL
ENSG00000131797	hsa-miR-155-5p	ENSG00000134698	8.54747e-05	0.53137	CL
ENSG00000204282	hsa-miR-145-5p	ENSG00000001626	8.58713e-05	0.531243	CL
ENSG00000240990	hsa-miR-224-5p	ENSG00000128710	8.61164e-05	0.531164	CL
ENSG00000206344	hsa-miR-17-5p	ENSG00000095383	8.62078e-05	0.531135	CL
ENSG00000218510	hsa-miR-221-3p	ENSG00000102879	8.6279e-05	0.531113	CL
ENSG00000177640	hsa-miR-135b-5p	ENSG00000067208	8.65648e-05	0.531022	CL
ENSG00000204623	hsa-miR-125b-5p	ENSG00000063438	8.67412e-05	0.530966	CL
ENSG00000267586	hsa-miR-21-5p	ENSG00000164342	8.72042e-05	0.53082	CL
ENSG00000227115	hsa-miR-211-5p	ENSG00000265972	8.75148e-05	0.530722	CL
ENSG00000227115	hsa-miR-204-5p	ENSG00000265972	8.75148e-05	0.530722	CL
ENSG00000267106	hsa-miR-106a-5p	ENSG00000197548	8.77216e-05	0.530657	CL
ENSG00000234390	hsa-miR-335-5p	ENSG00000155816	8.79161e-05	0.530596	CL
ENSG00000279873	hsa-miR-195-5p	ENSG00000112242	8.82778e-05	0.530483	CL
ENSG00000279873	hsa-miR-503-5p	ENSG00000112242	8.82778e-05	0.530483	CL
ENSG00000279873	hsa-miR-125b-5p	ENSG00000112242	8.82778e-05	0.530483	CL
ENSG00000279873	hsa-miR-497-5p	ENSG00000112242	8.82778e-05	0.530483	CL
ENSG00000279873	hsa-miR-125a-5p	ENSG00000112242	8.82778e-05	0.530483	CL
ENSG00000279873	hsa-miR-195-5p	ENSG00000007202	8.89665e-05	0.53027	CL
ENSG00000260032	hsa-miR-203a-3p	ENSG00000129473	8.93799e-05	0.530142	CL
ENSG00000214106	hsa-miR-21-5p	ENSG00000172575	8.9445e-05	0.530122	CL
ENSG00000269293	hsa-miR-181b-5p	ENSG00000114209	8.96032e-05	0.530073	CL
ENSG00000245526	hsa-miR-15a-5p	ENSG00000109572	8.96241e-05	0.530067	CL
ENSG00000237984	hsa-miR-21-5p	ENSG00000277443	8.98309e-05	0.530003	CL
ENSG00000231290	hsa-miR-106a-5p	ENSG00000106683	9.03512e-05	0.529844	CL
ENSG00000231290	hsa-miR-20b-5p	ENSG00000106683	9.03512e-05	0.529844	CL
ENSG00000231290	hsa-miR-20a-5p	ENSG00000106683	9.03512e-05	0.529844	CL
ENSG00000231290	hsa-miR-17-5p	ENSG00000106683	9.03512e-05	0.529844	CL
ENSG00000215424	hsa-miR-15b-5p	ENSG00000176920	9.04045e-05	0.529828	CL
ENSG00000245526	hsa-miR-139-5p	ENSG00000178764	9.05893e-05	0.529772	CL
ENSG00000279685	hsa-miR-141-3p	ENSG00000169554	9.14986e-05	0.529496	CL
ENSG00000279685	hsa-miR-154-5p	ENSG00000169554	9.14986e-05	0.529496	CL
ENSG00000206337	hsa-miR-125b-5p	ENSG00000111424	9.17135e-05	0.529432	CL
ENSG00000206337	hsa-miR-27b-3p	ENSG00000111424	9.17135e-05	0.529432	CL
ENSG00000279078	hsa-miR-15a-5p	ENSG00000110092	9.22899e-05	0.529259	CL
ENSG00000279078	hsa-miR-16-5p	ENSG00000110092	9.22899e-05	0.529259	CL
ENSG00000279078	hsa-miR-708-5p	ENSG00000110092	9.22899e-05	0.529259	CL
ENSG00000279078	hsa-miR-195-5p	ENSG00000110092	9.22899e-05	0.529259	CL
ENSG00000279078	hsa-miR-15b-5p	ENSG00000110092	9.22899e-05	0.529259	CL
ENSG00000279078	hsa-miR-211-5p	ENSG00000110092	9.22899e-05	0.529259	CL
ENSG00000279078	hsa-miR-101-3p	ENSG00000110092	9.22899e-05	0.529259	CL
ENSG00000279078	hsa-miR-19a-3p	ENSG00000110092	9.22899e-05	0.529259	CL
ENSG00000279078	hsa-miR-490-3p	ENSG00000110092	9.22899e-05	0.529259	CL
ENSG00000234420	hsa-miR-129-5p	ENSG00000134982	9.24557e-05	0.529209	CL
ENSG00000206337	hsa-miR-23a-3p	ENSG00000026103	9.25335e-05	0.529186	CL
ENSG00000206337	hsa-miR-106a-5p	ENSG00000026103	9.25335e-05	0.529186	CL
ENSG00000206337	hsa-miR-146a-5p	ENSG00000026103	9.25335e-05	0.529186	CL
ENSG00000272168	hsa-miR-130b-3p	ENSG00000198719	9.30599e-05	0.529029	CL
ENSG00000236824	hsa-miR-193a-3p	ENSG00000041353	9.31162e-05	0.529012	CL
ENSG00000255693	hsa-miR-143-3p	ENSG00000189283	9.31296e-05	0.529008	CL
ENSG00000277147	hsa-miR-148b-3p	ENSG00000111725	9.3297e-05	0.528959	CL
ENSG00000277147	hsa-miR-1-3p	ENSG00000120742	9.39941e-05	0.528753	CL
ENSG00000067992	hsa-miR-106a-5p	ENSG00000026103	9.43229e-05	0.528657	CL
ENSG00000227487	hsa-miR-125b-5p	ENSG00000063438	9.4538e-05	0.528594	CL
ENSG00000226711	hsa-miR-195-5p	ENSG00000140807	9.46354e-05	0.528565	CL
ENSG00000214106	hsa-miR-127-3p	ENSG00000170542	9.48863e-05	0.528492	CL
ENSG00000274602	hsa-miR-338-3p	ENSG00000243708	9.51051e-05	0.528428	CL
ENSG00000249859	hsa-miR-29a-3p	ENSG00000076604	9.52626e-05	0.528382	CL
ENSG00000171101	hsa-miR-34a-5p	ENSG00000105851	9.57415e-05	0.528243	CL
ENSG00000171101	hsa-miR-7-5p	ENSG00000105851	9.57415e-05	0.528243	CL
ENSG00000156273	hsa-miR-155-5p	ENSG00000073921	9.59493e-05	0.528183	CL
ENSG00000260852	hsa-miR-106a-5p	ENSG00000177169	9.6015e-05	0.528164	CL
ENSG00000260032	hsa-miR-155-5p	ENSG00000157933	9.62641e-05	0.528093	CL
ENSG00000223773	hsa-miR-27b-3p	ENSG00000149418	9.63734e-05	0.528061	CL
ENSG00000247271	hsa-miR-146a-5p	ENSG00000198712	9.64888e-05	0.528028	CL
ENSG00000082929	hsa-miR-129-5p	ENSG00000168398	9.65489e-05	0.528011	CL
ENSG00000272168	hsa-miR-29a-3p	ENSG00000117020	9.66538e-05	0.527981	CL
ENSG00000222041	hsa-miR-129-5p	ENSG00000026025	9.69129e-05	0.527906	CL
ENSG00000222041	hsa-miR-320a	ENSG00000026025	9.69129e-05	0.527906	CL
ENSG00000274956	hsa-miR-129-5p	ENSG00000134982	9.72486e-05	0.52781	CL
ENSG00000274956	hsa-miR-590-3p	ENSG00000134982	9.72486e-05	0.52781	CL
ENSG00000245573	hsa-miR-10a-5p	ENSG00000105698	9.7307e-05	0.527794	CL
ENSG00000234883	hsa-let-7a-5p	ENSG00000174775	9.76264e-05	0.527703	CL
ENSG00000234883	hsa-miR-143-3p	ENSG00000174775	9.76264e-05	0.527703	CL
ENSG00000234883	hsa-let-7b-5p	ENSG00000174775	9.76264e-05	0.527703	CL
ENSG00000223773	hsa-miR-124-3p	ENSG00000108691	9.77928e-05	0.527656	CL
ENSG00000204282	hsa-miR-128-3p	ENSG00000189056	9.79063e-05	0.527623	CL
ENSG00000245573	hsa-miR-224-5p	ENSG00000089220	9.79299e-05	0.527617	CL
ENSG00000255571	hsa-miR-182-5p	ENSG00000170873	9.81198e-05	0.527563	CL
ENSG00000255571	hsa-miR-96-5p	ENSG00000170873	9.81198e-05	0.527563	CL
ENSG00000237984	hsa-miR-338-3p	ENSG00000179456	9.81307e-05	0.52756	CL
ENSG00000225791	hsa-miR-383-5p	ENSG00000165672	9.82053e-05	0.527539	CL
ENSG00000280798	hsa-miR-200c-3p	ENSG00000149294	9.83676e-05	0.527493	CL
ENSG00000280798	hsa-miR-122-5p	ENSG00000149294	9.83676e-05	0.527493	CL
ENSG00000277147	hsa-miR-128-3p	ENSG00000168040	9.8377e-05	0.52749	CL
ENSG00000277147	hsa-miR-155-5p	ENSG00000168040	9.8377e-05	0.52749	CL
ENSG00000245573	hsa-miR-145-5p	ENSG00000151665	9.84096e-05	0.527481	CL
ENSG00000204241	hsa-miR-138-5p	ENSG00000189056	9.84184e-05	0.527479	CL
ENSG00000237372	hsa-miR-182-5p	ENSG00000128594	9.86179e-05	0.527422	CL
ENSG00000214106	hsa-miR-497-5p	ENSG00000183742	9.86477e-05	0.527414	CL
ENSG00000214106	hsa-miR-590-3p	ENSG00000183742	9.86477e-05	0.527414	CL
ENSG00000214106	hsa-miR-338-3p	ENSG00000183742	9.86477e-05	0.527414	CL
ENSG00000245573	hsa-miR-224-5p	ENSG00000158793	9.87155e-05	0.527395	CL
ENSG00000227477	hsa-miR-106a-5p	ENSG00000137869	9.89567e-05	0.527327	CL
ENSG00000245060	hsa-miR-218-5p	ENSG00000169242	9.89858e-05	0.527319	CL
ENSG00000255198	hsa-miR-106a-5p	ENSG00000085871	9.94387e-05	0.527192	CL
ENSG00000177640	hsa-miR-17-5p	ENSG00000105855	9.94848e-05	0.527179	CL
ENSG00000177640	hsa-miR-20a-5p	ENSG00000105855	9.94848e-05	0.527179	CL
ENSG00000245067	hsa-miR-302c-3p	ENSG00000204520	9.9781e-05	0.527097	CL
ENSG00000231690	hsa-miR-196a-5p	ENSG00000074527	9.98666e-05	0.527073	CL
ENSG00000279873	hsa-miR-15b-5p	ENSG00000123908	9.99889e-05	0.527039	CL
ENSG00000279873	hsa-miR-132-3p	ENSG00000123908	9.99889e-05	0.527039	CL
ENSG00000272168	hsa-miR-155-5p	ENSG00000185305	0.000100113	0.527004	CL
ENSG00000232973	hsa-miR-125b-5p	ENSG00000163577	0.000100479	0.526903	CL
ENSG00000232973	hsa-miR-30b-5p	ENSG00000163577	0.000100479	0.526903	CL
ENSG00000280798	hsa-miR-19a-3p	ENSG00000012124	0.000100498	0.526898	CL
ENSG00000226287	hsa-miR-7-5p	ENSG00000189043	0.000100691	0.526844	CL
ENSG00000226287	hsa-miR-145-5p	ENSG00000189043	0.000100691	0.526844	CL
ENSG00000225470	hsa-miR-138-5p	ENSG00000222041	0.000100694	0.526843	CL
ENSG00000227372	hsa-miR-155-5p	ENSG00000056736	0.000101121	0.526726	CL
ENSG00000214106	hsa-miR-338-3p	ENSG00000128602	0.000101217	0.526699	CL
ENSG00000273032	hsa-miR-34a-5p	ENSG00000198719	0.000101222	0.526698	CL
ENSG00000175061	hsa-miR-218-5p	ENSG00000089685	0.000101275	0.526683	CL
ENSG00000231419	hsa-miR-205-5p	ENSG00000065361	0.000101792	0.526542	CL
ENSG00000230006	hsa-miR-145-5p	ENSG00000124920	0.00010251	0.526346	CL
ENSG00000258867	hsa-miR-495-3p	ENSG00000108691	0.000102638	0.526311	CL
ENSG00000235597	hsa-miR-34a-5p	ENSG00000134323	0.000102676	0.526301	CL
ENSG00000235597	hsa-miR-449b-5p	ENSG00000134323	0.000102676	0.526301	CL
ENSG00000235597	hsa-let-7e-5p	ENSG00000134323	0.000102676	0.526301	CL
ENSG00000235597	hsa-miR-449a	ENSG00000134323	0.000102676	0.526301	CL
ENSG00000235597	hsa-miR-34c-5p	ENSG00000134323	0.000102676	0.526301	CL
ENSG00000204650	hsa-miR-106b-5p	ENSG00000237984	0.000102694	0.526296	CL
ENSG00000204650	hsa-miR-93-5p	ENSG00000237984	0.000102694	0.526296	CL
ENSG00000185837	hsa-miR-214-3p	ENSG00000111653	0.000102694	0.526296	CL
ENSG00000186594	hsa-miR-30a-3p	ENSG00000137801	0.000102919	0.526235	CL
ENSG00000249464	hsa-miR-1-3p	ENSG00000205542	0.000102922	0.526234	CL
ENSG00000214106	hsa-miR-21-5p	ENSG00000034152	0.000103656	0.526036	CL
ENSG00000214106	hsa-miR-214-3p	ENSG00000034152	0.000103656	0.526036	CL
ENSG00000247982	hsa-miR-199b-5p	ENSG00000163660	0.000103727	0.526017	CL
ENSG00000248698	hsa-miR-320a	ENSG00000136238	0.000103929	0.525962	CL
ENSG00000248698	hsa-miR-224-5p	ENSG00000136238	0.000103929	0.525962	CL
ENSG00000248698	hsa-miR-146a-5p	ENSG00000136238	0.000103929	0.525962	CL
ENSG00000237149	hsa-miR-138-5p	ENSG00000155366	0.000103988	0.525947	CL
ENSG00000177640	hsa-miR-124-3p	ENSG00000169083	0.000104482	0.525814	CL
ENSG00000177640	hsa-miR-185-5p	ENSG00000169083	0.000104482	0.525814	CL
ENSG00000266709	hsa-let-7e-5p	ENSG00000116017	0.000104486	0.525813	CL
ENSG00000237149	hsa-miR-106a-5p	ENSG00000197548	0.000105028	0.525669	CL
ENSG00000237737	hsa-miR-16-5p	ENSG00000135423	0.000105084	0.525654	CL
ENSG00000228784	hsa-miR-338-3p	ENSG00000046889	0.000105209	0.525621	CL
ENSG00000222041	hsa-miR-24-3p	ENSG00000117592	0.000105274	0.525604	CL
ENSG00000237125	hsa-miR-372-3p	ENSG00000147862	0.000105413	0.525567	CL
ENSG00000237125	hsa-miR-21-5p	ENSG00000147862	0.000105413	0.525567	CL
ENSG00000237125	hsa-miR-373-3p	ENSG00000147862	0.000105413	0.525567	CL
ENSG00000274026	hsa-miR-28-5p	ENSG00000117400	0.000105556	0.525529	CL
ENSG00000223756	hsa-miR-125a-5p	ENSG00000102125	0.000105565	0.525527	CL
ENSG00000230749	hsa-miR-106a-5p	ENSG00000085871	0.000105776	0.525471	CL
ENSG00000218510	hsa-miR-214-3p	ENSG00000111653	0.000106274	0.52534	CL
ENSG00000248019	hsa-miR-223-3p	ENSG00000117407	0.000106275	0.525339	CL
ENSG00000279873	hsa-miR-503-5p	ENSG00000092847	0.000106281	0.525338	CL
ENSG00000152931	hsa-miR-133a-3p	ENSG00000172889	0.000106413	0.525303	CL
ENSG00000272142	hsa-miR-299-3p	ENSG00000165060	0.000106445	0.525295	CL
ENSG00000227487	hsa-miR-10b-5p	ENSG00000075856	0.000106649	0.525241	CL
ENSG00000184608	hsa-miR-373-3p	ENSG00000136936	0.000106965	0.525158	CL
ENSG00000185904	hsa-miR-455-5p	ENSG00000099246	0.000107104	0.525122	CL
ENSG00000223773	hsa-miR-145-5p	ENSG00000151883	0.000107571	0.525	CL
ENSG00000258867	hsa-miR-15b-5p	ENSG00000106785	0.000107675	0.524973	CL
ENSG00000185837	hsa-miR-214-3p	ENSG00000087088	0.000107801	0.52494	CL
ENSG00000216775	hsa-miR-9-5p	ENSG00000119547	0.000107878	0.524921	CL
ENSG00000216775	hsa-miR-429	ENSG00000119547	0.000107878	0.524921	CL
ENSG00000231439	hsa-miR-503-5p	ENSG00000142632	0.000108119	0.524858	CL
ENSG00000225791	hsa-miR-24-3p	ENSG00000101844	0.000108168	0.524845	CL
ENSG00000225791	hsa-miR-24-3p	ENSG00000121022	0.000108228	0.52483	CL
ENSG00000214381	hsa-miR-21-5p	ENSG00000243414	0.000108239	0.524827	CL
ENSG00000255153	hsa-miR-124-3p	ENSG00000245848	0.000108482	0.524764	CL
ENSG00000203499	hsa-miR-10b-5p	ENSG00000156299	0.000108615	0.52473	CL
ENSG00000203499	hsa-miR-182-5p	ENSG00000156299	0.000108615	0.52473	CL
ENSG00000203499	hsa-miR-22-3p	ENSG00000156299	0.000108615	0.52473	CL
ENSG00000269293	hsa-miR-135b-5p	ENSG00000109919	0.000108984	0.524635	CL
ENSG00000239265	hsa-miR-24-3p	ENSG00000169692	0.000109625	0.524471	CL
ENSG00000222041	hsa-miR-129-5p	ENSG00000184182	0.000109675	0.524458	CL
ENSG00000267278	hsa-miR-1-3p	ENSG00000117400	0.000109748	0.524439	CL
ENSG00000231028	hsa-miR-133b	ENSG00000158234	0.000110957	0.524132	CL
ENSG00000250033	hsa-miR-424-5p	ENSG00000033800	0.000111149	0.524084	CL
ENSG00000249859	hsa-miR-145-5p	ENSG00000106268	0.000111496	0.523996	CL
ENSG00000223773	hsa-miR-335-5p	ENSG00000184182	0.000111815	0.523916	CL
ENSG00000235597	hsa-miR-30d-5p	ENSG00000105647	0.000111893	0.523896	CL
ENSG00000235597	hsa-miR-30a-5p	ENSG00000105647	0.000111893	0.523896	CL
ENSG00000249464	hsa-miR-137	ENSG00000070831	0.000112072	0.523851	CL
ENSG00000249464	hsa-miR-30c-5p	ENSG00000070831	0.000112072	0.523851	CL
ENSG00000260032	hsa-miR-203a-3p	ENSG00000177463	0.000112138	0.523835	CL
ENSG00000260032	hsa-miR-26b-5p	ENSG00000177463	0.000112138	0.523835	CL
ENSG00000248019	hsa-miR-133a-3p	ENSG00000151067	0.000112219	0.523815	CL
ENSG00000171101	hsa-miR-329-3p	ENSG00000177885	0.000112377	0.523775	CL
ENSG00000231419	hsa-miR-122-5p	ENSG00000154917	0.000112685	0.523698	CL
ENSG00000214106	hsa-miR-146a-5p	ENSG00000134070	0.000112734	0.523686	CL
ENSG00000279078	hsa-miR-194-5p	ENSG00000114739	0.00011284	0.523659	CL
ENSG00000263812	hsa-miR-10a-5p	ENSG00000176697	0.000112868	0.523652	CL
ENSG00000263812	hsa-miR-124-3p	ENSG00000176697	0.000112868	0.523652	CL
ENSG00000243701	hsa-miR-204-5p	ENSG00000165168	0.000113417	0.523516	CL
ENSG00000234616	hsa-miR-106a-5p	ENSG00000116688	0.00011342	0.523515	CL
ENSG00000214381	hsa-miR-144-3p	ENSG00000107968	0.00011343	0.523513	CL
ENSG00000248698	hsa-miR-326	ENSG00000113318	0.000113432	0.523512	CL
ENSG00000245060	hsa-miR-224-5p	ENSG00000076554	0.000113439	0.523511	CL
ENSG00000177410	hsa-miR-16-5p	ENSG00000213465	0.00011351	0.523493	CL
ENSG00000177410	hsa-miR-195-5p	ENSG00000213465	0.00011351	0.523493	CL
ENSG00000234741	hsa-miR-21-5p	ENSG00000156976	0.000113525	0.523489	CL
ENSG00000175061	hsa-miR-181d-5p	ENSG00000127314	0.00011373	0.523439	CL
ENSG00000260339	hsa-miR-145-5p	ENSG00000158769	0.000114099	0.523348	CL
ENSG00000174365	hsa-miR-19a-3p	ENSG00000006327	0.000114131	0.52334	CL
ENSG00000225470	hsa-miR-193a-3p	ENSG00000169016	0.000114304	0.523297	CL
ENSG00000260032	hsa-miR-203a-3p	ENSG00000163848	0.000114617	0.52322	CL
ENSG00000214106	hsa-miR-27b-3p	ENSG00000079156	0.000114735	0.523191	CL
ENSG00000233382	hsa-miR-106a-5p	ENSG00000085871	0.000114865	0.523159	CL
ENSG00000203930	hsa-miR-24-3p	ENSG00000061938	0.000115149	0.52309	CL
ENSG00000249464	hsa-miR-125b-5p	ENSG00000156171	0.000115485	0.523008	CL
ENSG00000233208	hsa-miR-23b-3p	ENSG00000142875	0.000116766	0.522697	CL
ENSG00000111850	hsa-miR-155-5p	ENSG00000148229	0.000116956	0.522651	CL
ENSG00000067992	hsa-miR-106a-5p	ENSG00000137869	0.000117395	0.522546	CL
ENSG00000179840	hsa-miR-485-5p	ENSG00000137312	0.00011755	0.522508	CL
ENSG00000267339	hsa-miR-200c-3p	ENSG00000148053	0.000117795	0.52245	CL
ENSG00000253438	hsa-miR-106a-5p	ENSG00000085871	0.000117851	0.522436	CL
ENSG00000228486	hsa-miR-129-5p	ENSG00000114770	0.000117907	0.522423	CL
ENSG00000179314	hsa-miR-22-3p	ENSG00000131473	0.000118232	0.522345	CL
ENSG00000272168	hsa-miR-27a-3p	ENSG00000196132	0.000118255	0.52234	CL
ENSG00000223773	hsa-miR-29b-3p	ENSG00000105329	0.000118676	0.52224	CL
ENSG00000223773	hsa-miR-144-3p	ENSG00000105329	0.000118676	0.52224	CL
ENSG00000223773	hsa-miR-422a	ENSG00000105329	0.000118676	0.52224	CL
ENSG00000223773	hsa-miR-130a-3p	ENSG00000105329	0.000118676	0.52224	CL
ENSG00000232656	hsa-miR-221-3p	ENSG00000172465	0.00011876	0.52222	CL
ENSG00000232656	hsa-miR-222-3p	ENSG00000172465	0.00011876	0.52222	CL
ENSG00000232656	hsa-miR-224-5p	ENSG00000172465	0.00011876	0.52222	CL
ENSG00000175967	hsa-miR-29a-3p	ENSG00000169855	0.000118763	0.522219	CL
ENSG00000243701	hsa-miR-200a-3p	ENSG00000168036	0.000118874	0.522192	CL
ENSG00000243701	hsa-miR-370-3p	ENSG00000168036	0.000118874	0.522192	CL
ENSG00000243701	hsa-miR-101-3p	ENSG00000168036	0.000118874	0.522192	CL
ENSG00000272168	hsa-miR-1-3p	ENSG00000164107	0.000118941	0.522177	CL
ENSG00000257242	hsa-miR-182-5p	ENSG00000102678	0.000119239	0.522106	CL
ENSG00000229980	hsa-miR-145-5p	ENSG00000181449	0.000119738	0.521988	CL
ENSG00000273032	hsa-miR-34a-5p	ENSG00000198910	0.000119926	0.521944	CL
ENSG00000237372	hsa-miR-342-3p	ENSG00000172201	0.000120192	0.521881	CL
ENSG00000249087	hsa-miR-145-5p	ENSG00000185499	0.000120525	0.521803	CL
ENSG00000249087	hsa-miR-125b-5p	ENSG00000185499	0.000120525	0.521803	CL
ENSG00000225733	hsa-miR-106a-5p	ENSG00000197548	0.000120918	0.521711	CL
ENSG00000249464	hsa-miR-1-3p	ENSG00000169299	0.00012142	0.521594	CL
ENSG00000245105	hsa-miR-223-3p	ENSG00000082397	0.000121573	0.521558	CL
ENSG00000231419	hsa-miR-7-5p	ENSG00000117461	0.000121657	0.521539	CL
ENSG00000230006	hsa-miR-181a-5p	ENSG00000082175	0.000121668	0.521536	CL
ENSG00000267339	hsa-miR-376a-3p	ENSG00000163884	0.000121894	0.521484	CL
ENSG00000242516	hsa-miR-125a-5p	ENSG00000158089	0.000122244	0.521402	CL
ENSG00000177640	hsa-miR-335-5p	ENSG00000155816	0.000122396	0.521367	CL
ENSG00000230006	hsa-miR-129-5p	ENSG00000162552	0.000122576	0.521326	CL
ENSG00000230006	hsa-miR-16-5p	ENSG00000162552	0.000122576	0.521326	CL
ENSG00000260339	hsa-miR-155-5p	ENSG00000056736	0.000122844	0.521264	CL
ENSG00000237941	hsa-miR-15b-5p	ENSG00000136535	0.000123139	0.521196	CL
ENSG00000214106	hsa-miR-497-5p	ENSG00000104365	0.000123272	0.521165	CL
ENSG00000222041	hsa-miR-149-5p	ENSG00000172936	0.000123296	0.52116	CL
ENSG00000248698	hsa-miR-29a-3p	ENSG00000142166	0.000123442	0.521126	CL
ENSG00000231419	hsa-miR-140-5p	ENSG00000068024	0.000123792	0.521046	CL
ENSG00000234883	hsa-miR-223-3p	ENSG00000135363	0.000124393	0.520909	CL
ENSG00000279078	hsa-miR-195-5p	ENSG00000140807	0.00012445	0.520896	CL
ENSG00000225470	hsa-miR-29c-3p	ENSG00000139372	0.000124458	0.520894	CL
ENSG00000225470	hsa-miR-29b-3p	ENSG00000139372	0.000124458	0.520894	CL
ENSG00000225470	hsa-miR-29a-3p	ENSG00000139372	0.000124458	0.520894	CL
ENSG00000214106	hsa-miR-146a-5p	ENSG00000133961	0.000124655	0.520849	CL
ENSG00000214106	hsa-miR-31-5p	ENSG00000133961	0.000124655	0.520849	CL
ENSG00000156273	hsa-miR-206	ENSG00000152818	0.000125581	0.52064	CL
ENSG00000269293	hsa-miR-9-5p	ENSG00000115738	0.000125772	0.520596	CL
ENSG00000247271	hsa-miR-224-5p	ENSG00000089220	0.000125793	0.520592	CL
ENSG00000177410	hsa-miR-182-5p	ENSG00000169021	0.000125829	0.520583	CL
ENSG00000223773	hsa-miR-101-3p	ENSG00000214575	0.000126233	0.520493	CL
ENSG00000153187	hsa-miR-424-5p	ENSG00000137807	0.000126428	0.520449	CL
ENSG00000222041	hsa-miR-503-5p	ENSG00000101017	0.000126791	0.520367	CL
ENSG00000267339	hsa-miR-200c-3p	ENSG00000149294	0.000127499	0.520209	CL
ENSG00000243701	hsa-miR-204-5p	ENSG00000120742	0.000127663	0.520173	CL
ENSG00000260032	hsa-miR-363-3p	ENSG00000148400	0.000127745	0.520155	CL
ENSG00000260032	hsa-miR-410-3p	ENSG00000148400	0.000127745	0.520155	CL
ENSG00000260032	hsa-miR-144-3p	ENSG00000148400	0.000127745	0.520155	CL
ENSG00000176124	hsa-miR-31-5p	ENSG00000076242	0.000127921	0.520115	CL
ENSG00000176124	hsa-miR-148b-3p	ENSG00000076242	0.000127921	0.520115	CL
ENSG00000239332	hsa-miR-30e-5p	ENSG00000057663	0.000127966	0.520105	CL
ENSG00000239332	hsa-miR-30d-5p	ENSG00000057663	0.000127966	0.520105	CL
ENSG00000220575	hsa-miR-185-5p	ENSG00000172350	0.000128576	0.51997	CL
ENSG00000249859	hsa-miR-9-5p	ENSG00000109113	0.00012873	0.519936	CL
ENSG00000239265	hsa-miR-21-5p	ENSG00000120889	0.000129206	0.519831	CL
ENSG00000235703	hsa-miR-223-3p	ENSG00000117407	0.000130049	0.519646	CL
ENSG00000215424	hsa-miR-26a-5p	ENSG00000149311	0.000130637	0.519518	CL
ENSG00000215424	hsa-miR-106a-5p	ENSG00000149311	0.000130637	0.519518	CL
ENSG00000215424	hsa-miR-181b-5p	ENSG00000149311	0.000130637	0.519518	CL
ENSG00000267270	hsa-miR-194-5p	ENSG00000111206	0.00013078	0.519487	CL
ENSG00000267270	hsa-miR-134-5p	ENSG00000111206	0.00013078	0.519487	CL
ENSG00000267270	hsa-miR-320a	ENSG00000111206	0.00013078	0.519487	CL
ENSG00000267270	hsa-miR-204-5p	ENSG00000111206	0.00013078	0.519487	CL
ENSG00000206337	hsa-miR-125b-5p	ENSG00000171608	0.000131048	0.519428	CL
ENSG00000206337	hsa-miR-30a-5p	ENSG00000171608	0.000131048	0.519428	CL
ENSG00000245573	hsa-miR-26b-5p	ENSG00000141741	0.000131448	0.519342	CL
ENSG00000156273	hsa-miR-24-3p	ENSG00000140564	0.000132024	0.519217	CL
ENSG00000235958	hsa-miR-20a-5p	ENSG00000008710	0.000132027	0.519216	CL
ENSG00000227372	hsa-miR-135a-5p	ENSG00000146587	0.000132451	0.519125	CL
ENSG00000227372	hsa-miR-155-5p	ENSG00000146587	0.000132451	0.519125	CL
ENSG00000186594	hsa-miR-137	ENSG00000073756	0.00013248	0.519119	CL
ENSG00000186594	hsa-miR-26b-5p	ENSG00000073756	0.00013248	0.519119	CL
ENSG00000237984	hsa-miR-26a-5p	ENSG00000102678	0.0001326	0.519093	CL
ENSG00000235597	hsa-miR-339-5p	ENSG00000139910	0.00013284	0.519042	CL
ENSG00000258057	hsa-miR-138-5p	ENSG00000189056	0.000133171	0.518971	CL
ENSG00000236859	hsa-miR-34a-5p	ENSG00000133731	0.000133365	0.518929	CL
ENSG00000260852	hsa-miR-181a-5p	ENSG00000040199	0.000133513	0.518898	CL
ENSG00000265688	hsa-miR-874-3p	ENSG00000127445	0.000133608	0.518877	CL
ENSG00000222041	hsa-miR-106a-5p	ENSG00000124762	0.000133669	0.518864	CL
ENSG00000222041	hsa-miR-503-5p	ENSG00000124762	0.000133669	0.518864	CL
ENSG00000176124	hsa-miR-200b-3p	ENSG00000121481	0.000133686	0.518861	CL
ENSG00000176124	hsa-miR-200c-3p	ENSG00000121481	0.000133686	0.518861	CL
ENSG00000248019	hsa-miR-144-3p	ENSG00000155657	0.000133812	0.518834	CL
ENSG00000237984	hsa-miR-340-5p	ENSG00000138764	0.000134312	0.518727	CL
ENSG00000247240	hsa-miR-200c-3p	ENSG00000127445	0.000134562	0.518674	CL
ENSG00000177640	hsa-miR-221-3p	ENSG00000117155	0.000134918	0.518599	CL
ENSG00000177640	hsa-miR-155-5p	ENSG00000117155	0.000134918	0.518599	CL
ENSG00000226746	hsa-miR-15a-5p	ENSG00000198792	0.000135152	0.518549	CL
ENSG00000236859	hsa-miR-34a-5p	ENSG00000125703	0.000135321	0.518514	CL
ENSG00000278916	hsa-miR-23a-3p	ENSG00000198830	0.000135528	0.51847	CL
ENSG00000234741	hsa-miR-21-5p	ENSG00000110801	0.000135566	0.518462	CL
ENSG00000226051	hsa-miR-378a-3p	ENSG00000137869	0.000135587	0.518458	CL
ENSG00000267586	hsa-miR-17-5p	ENSG00000196664	0.000136522	0.518261	CL
ENSG00000267339	hsa-miR-186-5p	ENSG00000089041	0.000136686	0.518227	CL
ENSG00000243701	hsa-miR-19a-3p	ENSG00000114166	0.000136865	0.51819	CL
ENSG00000243701	hsa-miR-19b-3p	ENSG00000114166	0.000136865	0.51819	CL
ENSG00000223773	hsa-miR-377-3p	ENSG00000142168	0.000137164	0.518127	CL
ENSG00000225470	hsa-miR-181b-5p	ENSG00000121481	0.000137589	0.518039	CL
ENSG00000231419	hsa-miR-203a-3p	ENSG00000119139	0.000137716	0.518012	CL
ENSG00000235703	hsa-miR-338-3p	ENSG00000243708	0.000138179	0.517916	CL
ENSG00000175061	hsa-miR-200a-3p	ENSG00000108064	0.000138193	0.517913	CL
ENSG00000234883	hsa-miR-19a-3p	ENSG00000143545	0.000138755	0.517797	CL
ENSG00000245067	hsa-miR-93-5p	ENSG00000169429	0.000138765	0.517795	CL
[truncated: 88,741 more rows]
